# Supplementary material for: Proteome and Physiological Characterization of Halotolerant Nodule Endophytes: The Case of Rahnella aquatilis and Serratia plymuthica
Source: MDPI journal article supplement (doi:10.3390/microorganisms10050890), 2022-04-24
Supplement: s1 [file s1]

# Proteome and physiological characterization of halotolerant nodule endophytes: the case of *Rahnella aquatilis* and *Serratia plymuthica*

Giorgia Novello<sup>1\*</sup>, Elisa Gamalero<sup>1</sup>, Nadia Massa<sup>1</sup>, Patrizia Cesaro<sup>1</sup>, Guido Lingua<sup>1</sup>, Valeria Todeschini<sup>1</sup>, Alice Caramaschi<sup>2</sup>, Francesco Favero<sup>3,4</sup>, Davide Corà<sup>3,4</sup>, Marcello Manfredi<sup>3,4</sup>, Emilio Marengo<sup>1</sup>, Elisa Bona<sup>2,3§</sup>

<sup>1</sup> Dipartimento di Scienze e Innovazione Tecnologica, Università del Piemonte Orientale, Alessandria, Italy; [giorgia.novello@uniupo.it](mailto:giorgia.novello@uniupo.it), [nadia.massa@uniupo.it](mailto:nadia.massa@uniupo.it), [patrizia.cesaro@uniupo.it](mailto:patrizia.cesaro@uniupo.it), [guido.lingua@uniupo.it](mailto:guido.lingua@uniupo.it), [valeria.todeschini@uniupo.it](mailto:valeria.todeschini@uniupo.it), [emilio.marengo@uniupo.it](mailto:emilio.marengo@uniupo.it), [elisa.gamalero@uniupo.it](mailto:elisa.gamalero@uniupo.it)

<sup>2</sup> Dipartimento per lo Sviluppo Sostenibile e la Transizione Ecologica, Vercelli, Italy; [elisa.bona@uniupo.it](mailto:elisa.bona@uniupo.it), [alice.caramaschi@uniupo.it](mailto:alice.caramaschi@uniupo.it)

<sup>3</sup> Center on Autoimmune and Allergic Diseases (CAAD), Università del Piemonte Orientale, Novara, Italy [francesco.favero@uniupo.it](mailto:francesco.favero@uniupo.it); [davide.cora@uniupo.it](mailto:davide.cora@uniupo.it)

<sup>4</sup> Dipartimento di Medicina Traslazionale, Università del Piemonte Orientale, Novara, Italy [marcello.manfredi@uniupo.it](mailto:marcello.manfredi@uniupo.it); [francesco.favero@uniupo.it](mailto:francesco.favero@uniupo.it); [davide.cora@uniupo.it](mailto:davide.cora@uniupo.it)

\* Correspondence: [\\*giorgia.novello@uniupo.it](mailto:giorgia.novello@uniupo.it); § [elisa.bona@uniupo.it](mailto:elisa.bona@uniupo.it).

## Supplementary materials:

**Table S1.** Identified proteins in Ra4 (*Rahnella aquatilis*).

**Table S2.** Identified proteins in Sp2 (*Serratia plymuthica*).

**Table S3.** Differential expression of proteins in Ra4 (*Rahnella aquatilis*) treated with 0.4% NaCl vs Control.

**Table S4.** Differential expression of proteins in Sp2 (*Serratia plymuthica*) treated with 0.4% NaCl vs Control.

**Table S5.** GO terms of proteins overexpressed both in Ra4 (*Rahnella aquatilis*) and in Sp2 (*Serratia plymuthica*) treated with 0.4% NaCl vs Control.

**Table S6.** GO terms of proteins overexpressed only in Ra4 (*Rahnella aquatilis*) treated with 0.4% NaCl vs Control.

**Table S7.** GO terms of proteins overexpressed only in Sp2 (*Serratia plymuthica*) treated with 0.4% NaCl vs Control.

**Table S8.** GO terms of proteins underexpressed both in Ra4 (*Rahnella aquatilis*) and in Sp2 (*Serratia plymuthica*) treated with 0.4% NaCl vs Control.

**Table S9.** GO terms of proteins underexpressed only in Ra4 (*Rahnella aquatilis*) treated with 0.4% NaCl vs Control.

**Table S10.** GO terms of proteins underexpressed only in Sp2 (*Serratia plymuthica*) treated with 0.4% NaCl vs Control.

**Table S1.** Identified proteins in Ra4 (*Rahnella aquatilis*).

| Protein code   | Protein identification                                                  | Reference organism                        |
|----------------|-------------------------------------------------------------------------|-------------------------------------------|
| KFD02968.1     | ATP-binding component of an ABC superfamily transporter                 | Rahnella aquatilis CIP 78.65 = ATCC 33071 |
| KFD16213.1     | hypothetical protein GRAQ_00881                                         | Rahnella aquatilis CIP 78.65 = ATCC 33071 |
| RKT66530.1     | shikimate kinase                                                        | Rahnella aquatilis                        |
| WP_001144069.1 | MULTISPECIES: 30S ribosomal protein S21                                 | Bacteria                                  |
| WP_002210155.1 | MULTISPECIES: 30S ribosomal protein S18                                 | Enterobacterales                          |
| WP_002221949.1 | MULTISPECIES: transcription antiterminator/RNA stability regulator CspE | Enterobacterales                          |
| WP_002227352.1 | MULTISPECIES: 50S ribosomal protein L36                                 | Enterobacterales                          |
| WP_002919219.1 | MULTISPECIES: DNA-directed RNA polymerase subunit alpha                 | Enterobacterales                          |
| WP_004089944.1 | MULTISPECIES: integration host factor subunit alpha                     | Enterobacterales                          |
| WP_004093904.1 | MULTISPECIES: F0F1 ATP synthase subunit C                               | Bacteria                                  |
| WP_004391423.1 | MULTISPECIES: 50S ribosomal protein L22                                 | Enterobacterales                          |
| WP_004392084.1 | MULTISPECIES: 50S ribosomal protein L33                                 | Enterobacterales                          |
| WP_004929731.1 | MULTISPECIES: 30S ribosomal protein S11                                 | Enterobacterales                          |
| WP_004929772.1 | MULTISPECIES: 30S ribosomal protein S19                                 | Enterobacterales                          |
| WP_004931195.1 | MULTISPECIES: 50S ribosomal protein L28                                 | Enterobacterales                          |
| WP_005969574.1 | MULTISPECIES: 30S ribosomal protein S7                                  | Enterobacterales                          |
| WP_008457164.1 | MULTISPECIES: 50S ribosomal protein L14                                 | Enterobacterales                          |
| WP_009634688.1 | MULTISPECIES: cell division protein FtsA                                | Yersiniaceae                              |
| WP_009637487.1 | MULTISPECIES: 50S ribosomal protein L34                                 | Yersiniaceae                              |
| WP_009639175.1 | MULTISPECIES: 30S ribosomal protein S10                                 | Gammaproteobacteria                       |
| WP_009639183.1 | MULTISPECIES: 50S ribosomal protein L16                                 | Yersiniaceae                              |
| WP_013573626.1 | MULTISPECIES: peptidylprolyl isomerase A                                | Rahnella sp.                              |
| WP_013573634.1 | MULTISPECIES: cAMP-activated global transcriptional regulator CRP       | Yersiniaceae                              |
| WP_013573668.1 | MULTISPECIES: 30S ribosomal protein S12                                 | Yersiniaceae                              |
| WP_013573670.1 | elongation factor Tu                                                    | Rahnella sp.                              |
| WP_013573688.1 | MULTISPECIES: 50S ribosomal protein L4                                  | Rahnella sp.                              |
| WP_013573689.1 | MULTISPECIES: 50S ribosomal protein L23                                 | Rahnella sp.                              |
| WP_013573691.1 | MULTISPECIES: 30S ribosomal protein S3                                  | Rahnella sp.                              |
| WP_013573692.1 | MULTISPECIES: 50S ribosomal protein L29                                 | Yersiniaceae                              |
| WP_013573695.1 | MULTISPECIES: 50S ribosomal protein L5                                  | Yersiniaceae                              |
| WP_013573696.1 | MULTISPECIES: 30S ribosomal protein S14                                 | Yersiniaceae                              |
| WP_013573697.1 | MULTISPECIES: 30S ribosomal protein S8                                  | Bacteria                                  |
| WP_013573699.1 | MULTISPECIES: 50S ribosomal protein L18                                 | Yersiniaceae                              |
| WP_013573700.1 | MULTISPECIES: 30S ribosomal protein S5                                  | Yersiniaceae                              |
| WP_013573701.1 | MULTISPECIES: 50S ribosomal protein L30                                 | Enterobacterales                          |
| WP_013573702.1 | MULTISPECIES: 50S ribosomal protein L15                                 | Rahnella sp.                              |
| WP_013573704.1 | MULTISPECIES: 30S ribosomal protein S13                                 | Yersiniaceae                              |
| WP_013573706.1 | MULTISPECIES: 50S ribosomal protein L17                                 | Yersiniaceae                              |
| WP_013573778.1 | MULTISPECIES: 50S ribosomal protein L9                                  | Yersiniaceae                              |
| WP_013573791.1 | MULTISPECIES: inorganic diphosphatase                                   | Rahnella sp.                              |
| WP_013573794.1 | MULTISPECIES: class 1 fructose-bisphosphatase                           | Rahnella sp.                              |
| WP_013573804.1 | MULTISPECIES: 50S ribosomal protein L21                                 | Rahnella sp.                              |
| WP_013573995.1 | MULTISPECIES: phosphopyruvate hydratase                                 | Rahnella sp.                              |
| WP_013574115.1 | MULTISPECIES: lysine--tRNA ligase                                       | Rahnella sp.                              |
| WP_013574196.1 | MULTISPECIES: ribosome recycling factor                                 | Rahnella sp.                              |
| WP_013574351.1 | MULTISPECIES: nitrogen regulatory protein P-II                          | Yersiniaceae                              |
| WP_013574367.1 | MULTISPECIES: nucleoside-diphosphate kinase                             | Yersiniaceae                              |
| WP_013574412.1 | MULTISPECIES: transketolase                                             | Rahnella sp.                              |
| WP_013574433.1 | MULTISPECIES: phosphocarrier protein Hpr                                | Rahnella sp.                              |
| WP_013574579.1 | MULTISPECIES: phosphate acetyltransferase                               | Rahnella sp.                              |
| WP_013574593.1 | MULTISPECIES: NADH-quinone oxidoreductase subunit NuoF                  | Rahnella sp.                              |
| WP_013574663.1 | MULTISPECIES: 1-phosphofructokinase                                     | Rahnella sp.                              |
| WP_013574775.1 | MULTISPECIES: leucine-responsive transcriptional regulator Lrp          | Yersiniaceae                              |
| WP_013574828.1 | formate C-acetyltransferase                                             | Rahnella sp.                              |
| WP_013575246.1 | MULTISPECIES: transcription antiterminator/RNA stability regulator CspE | Yersiniaceae                              |
| WP_013575313.1 | MULTISPECIES: pyruvate kinase                                           | Rahnella sp.                              |
| WP_013575323.1 | MULTISPECIES: cell division topological specificity factor MinE         | Rahnella sp.                              |

| Protein code   | Protein identification                                                    | Reference organism |
|----------------|---------------------------------------------------------------------------|--------------------|
| WP_013575324.1 | MULTISPECIES: septum site-determining protein MinD                        | Rahnella sp.       |
| WP_013575568.1 | MULTISPECIES: DUF1471 domain-containing protein                           | Rahnella sp.       |
| WP_013575778.1 | MULTISPECIES: FlhC/FlhB family flagellin                                  | Rahnella sp.       |
| WP_013575910.1 | MULTISPECIES: aconitate hydratase AcnA                                    | Rahnella sp.       |
| WP_013575930.1 | MULTISPECIES: BON domain-containing protein                               | Rahnella sp.       |
| WP_013575931.1 | MULTISPECIES: outer membrane protein OmpW                                 | Rahnella sp.       |
| WP_013575948.1 | MULTISPECIES: bifunctional acetaldehyde-CoA/alcohol dehydrogenase         | Rahnella sp.       |
| WP_013575950.1 | MULTISPECIES: DNA-binding transcriptional regulator H-NS                  | Rahnella sp.       |
| WP_013576093.1 | MULTISPECIES: major outer membrane lipoprotein                            | Yersiniaceae       |
| WP_013576134.1 | MULTISPECIES: 50S ribosomal protein L20                                   | Yersiniaceae       |
| WP_013576136.1 | MULTISPECIES: translation initiation factor IF-3                          | Yersiniaceae       |
| WP_013576150.1 | MULTISPECIES: carboxy terminal-processing peptidase                       | Rahnella sp.       |
| WP_013576192.1 | MULTISPECIES: PTS mannose transporter subunit IID                         | Rahnella sp.       |
| WP_013576210.1 | MULTISPECIES: NADP-dependent isocitrate dehydrogenase                     | Rahnella sp.       |
| WP_013576245.1 | MULTISPECIES: 3-oxoacyl-ACP reductase FabG                                | Rahnella sp.       |
| WP_013576250.1 | MULTISPECIES: 23S rRNA accumulation protein YceD                          | Rahnella sp.       |
| WP_013576426.1 | MULTISPECIES: peptidoglycan-associated lipoprotein Pal                    | Rahnella sp.       |
| WP_013576500.1 | MULTISPECIES: DUF493 family protein                                       | Rahnella sp.       |
| WP_013576637.1 | MULTISPECIES: DNA-binding protein HU-beta                                 | Rahnella sp.       |
| WP_013576663.1 | MULTISPECIES: transcription antitermination factor NusB                   | Yersiniaceae       |
| WP_013576670.1 | MULTISPECIES: preprotein translocase subunit YajC                         | Rahnella sp.       |
| WP_013577239.1 | MULTISPECIES: 50S ribosomal protein L13                                   | Yersiniaceae       |
| WP_013577291.1 | MULTISPECIES: rod shape-determining protein                               | Yersiniaceae       |
| WP_013577396.1 | MULTISPECIES: DNA-binding protein HU-alpha                                | Yersiniaceae       |
| WP_013577410.1 | MULTISPECIES: 50S ribosomal protein L7/L12                                | Yersiniaceae       |
| WP_013577414.1 | MULTISPECIES: transcription termination/antitermination protein NusG      | Rahnella sp.       |
| WP_013577536.1 | MULTISPECIES: transcription termination factor Rho                        | Rahnella sp.       |
| WP_013577537.1 | MULTISPECIES: thioredoxin TrxA                                            | Yersiniaceae       |
| WP_013577542.1 | MULTISPECIES: ketol-acid reductoisomerase                                 | Rahnella sp.       |
| WP_013577556.1 | MULTISPECIES: ABC transporter substrate-binding protein                   | Rahnella sp.       |
| WP_013577593.1 | MULTISPECIES: triose-phosphate isomerase                                  | Rahnella sp.       |
| WP_013577602.1 | MULTISPECIES: protein-export chaperone SecB                               | Rahnella sp.       |
| WP_013577652.1 | MULTISPECIES: glutamate--ammonia ligase                                   | Rahnella sp.       |
| WP_013577682.1 | MULTISPECIES: FOF1 ATP synthase subunit alpha                             | Rahnella sp.       |
| WP_014333460.1 | MULTISPECIES: universal stress protein UspA                               | Yersiniaceae       |
| WP_014333586.1 | elongation factor G                                                       | Rahnella aquatilis |
| WP_014333589.1 | MULTISPECIES: bacterioferritin                                            | Rahnella sp.       |
| WP_014333606.1 | MULTISPECIES: 30S ribosomal protein S4                                    | Rahnella sp.       |
| WP_014333640.1 | chaperonin GroEL                                                          | Rahnella aquatilis |
| WP_014333667.1 | 50S ribosomal protein L9                                                  | Rahnella aquatilis |
| WP_014333671.1 | bifunctional 2',3'-cyclic-nucleotide 2'-phosphodiesterase/3'-nucleotidase | Rahnella aquatilis |
| WP_014333680.1 | HAMP domain-containing protein                                            | Rahnella aquatilis |
| WP_014333706.1 | MULTISPECIES: 30S ribosomal protein S15                                   | Rahnella sp.       |
| WP_014333707.1 | polyribonucleotide nucleotidyltransferase                                 | Rahnella aquatilis |
| WP_014411489.1 | MULTISPECIES: glycerol-3-phosphate dehydrogenase                          | Rahnella sp.       |
| WP_014411563.1 | 30S ribosomal protein S6                                                  | Rahnella aquatilis |
| WP_014416698.1 | MULTISPECIES: NAD-dependent malic enzyme                                  | Rahnella sp.       |
| WP_015689898.1 | MULTISPECIES: thiol peroxidase                                            | Rahnella sp.       |
| WP_015690067.1 | aconitate hydratase AcnA                                                  | Rahnella aquatilis |
| WP_015690190.1 | MULTISPECIES: acyl carrier protein                                        | Yersiniaceae       |
| WP_015690312.1 | MULTISPECIES: protein translocase subunit SecD                            | Rahnella sp.       |
| WP_015690520.1 | 50S ribosomal protein L13                                                 | Rahnella aquatilis |
| WP_015695859.1 | outer membrane channel protein TolC                                       | Rahnella aquatilis |
| WP_015695890.1 | phosphopyruvate hydratase                                                 | Rahnella aquatilis |
| WP_015695926.1 | S-ribosylhomocysteine lyase                                               | Rahnella aquatilis |
| WP_015695958.1 | ATP-dependent chaperone ClpB                                              | Rahnella aquatilis |
| WP_015695975.1 | glycine betaine/L-proline ABC transporter substrate-binding protein ProX  | Rahnella aquatilis |
| WP_015696061.1 | NADP(H)-dependent aldo-keto reductase                                     | Rahnella aquatilis |

| Protein code   | Protein identification                                                | Reference organism |
|----------------|-----------------------------------------------------------------------|--------------------|
| WP_015696082.1 | LOG family protein                                                    | Rahnella aquatilis |
| WP_015696269.1 | IMP dehydrogenase                                                     | Rahnella aquatilis |
| WP_015696270.1 | glutamine-hydrolyzing GMP synthase                                    | Rahnella aquatilis |
| WP_015696299.1 | transketolase                                                         | Rahnella aquatilis |
| WP_015696300.1 | transaldolase                                                         | Rahnella aquatilis |
| WP_015696316.1 | phosphoenolpyruvate-protein phosphotransferase PtsI                   | Rahnella aquatilis |
| WP_015696434.1 | amidophosphoribosyltransferase                                        | Rahnella aquatilis |
| WP_015696452.1 | acetate kinase                                                        | Rahnella aquatilis |
| WP_015696607.1 | thioredoxin-disulfide reductase                                       | Rahnella aquatilis |
| WP_015696611.1 | MULTISPECIES: serine--tRNA ligase                                     | Rahnella sp.       |
| WP_015696652.1 | formate transporter FocA                                              | Rahnella aquatilis |
| WP_015696657.1 | (d)CMP kinase                                                         | Rahnella aquatilis |
| WP_015696675.1 | asparagine--tRNA ligase                                               | Rahnella aquatilis |
| WP_015696682.1 | quinone-dependent dihydroorotate dehydrogenase                        | Rahnella aquatilis |
| WP_015696692.1 | porin OmpA                                                            | Rahnella aquatilis |
| WP_015696862.1 | aspartate--tRNA ligase                                                | Rahnella aquatilis |
| WP_015697074.1 | UDP-glucose/GDP-mannose dehydrogenase family protein                  | Rahnella aquatilis |
| WP_015697077.1 | bifunctional acetaldehyde-CoA/alcohol dehydrogenase                   | Rahnella aquatilis |
| WP_015697179.1 | glucose-6-phosphate dehydrogenase                                     | Rahnella aquatilis |
| WP_015697208.1 | MULTISPECIES: PrkA family serine protein kinase                       | Rahnella sp.       |
| WP_015697217.1 | NAD(P)H nitroreductase                                                | Rahnella aquatilis |
| WP_015697381.1 | Re/Si-specific NAD(P)(+) transhydrogenase subunit beta                | Rahnella aquatilis |
| WP_015697784.1 | transcriptional regulator SlyA                                        | Rahnella aquatilis |
| WP_015697791.1 | MULTISPECIES: lactoylglutathione lyase                                | Rahnella sp.       |
| WP_015697793.1 | MULTISPECIES: Grx4 family monothiol glutaredoxin                      | Rahnella sp.       |
| WP_015697836.1 | phenylalanine--tRNA ligase subunit alpha                              | Rahnella aquatilis |
| WP_015697837.1 | threonine--tRNA ligase                                                | Rahnella aquatilis |
| WP_015697849.1 | carboxy terminal-processing peptidase                                 | Rahnella aquatilis |
| WP_015697850.1 | MULTISPECIES: RNA chaperone ProQ                                      | Rahnella sp.       |
| WP_015697878.1 | ATP-dependent RNA helicase DbpA                                       | Rahnella aquatilis |
| WP_015697886.1 | PTS mannose transporter subunit IID                                   | Rahnella aquatilis |
| WP_015697909.1 | adenylosuccinate lyase                                                | Rahnella aquatilis |
| WP_015697921.1 | alpha/beta hydrolase                                                  | Rahnella aquatilis |
| WP_015697927.1 | PTS glucose transporter subunit IIBC                                  | Rahnella aquatilis |
| WP_015697933.1 | beta-ketoacyl-ACP synthase II                                         | Rahnella aquatilis |
| WP_015697935.1 | ketoacyl-ACP synthase III                                             | Rahnella aquatilis |
| WP_015697963.1 | glucan biosynthesis protein G                                         | Rahnella aquatilis |
| WP_015698105.1 | Tol-Pal system protein TolB                                           | Rahnella aquatilis |
| WP_015698114.1 | succinate dehydrogenase iron-sulfur subunit                           | Rahnella aquatilis |
| WP_015698140.1 | MULTISPECIES: ferric iron uptake transcriptional regulator            | Rahnella sp.       |
| WP_015698255.1 | phosphoribosylformylglycinamide cyclo-ligase                          | Rahnella aquatilis |
| WP_015698322.1 | MULTISPECIES: endopeptidase La                                        | Rahnella sp.       |
| WP_015698812.1 | leucyl aminopeptidase                                                 | Rahnella aquatilis |
| WP_015698880.1 | stringent starvation protein A                                        | Rahnella aquatilis |
| WP_015698881.1 | 30S ribosomal protein S9                                              | Rahnella aquatilis |
| WP_015698929.1 | acetyl-CoA carboxylase biotin carboxyl carrier protein                | Rahnella aquatilis |
| WP_015698930.1 | acetyl-CoA carboxylase biotin carboxylase subunit                     | Rahnella aquatilis |
| WP_015699039.1 | MULTISPECIES: DNA-directed RNA polymerase subunit beta                | Rahnella sp.       |
| WP_015699040.1 | 50S ribosomal protein L1                                              | Rahnella aquatilis |
| WP_015699041.1 | 50S ribosomal protein L11                                             | Rahnella aquatilis |
| WP_015699185.1 | HslU--HslV peptidase ATPase subunit                                   | Rahnella aquatilis |
| WP_015699238.1 | MULTISPECIES: DNA-directed RNA polymerase subunit omega               | Rahnella sp.       |
| WP_015699278.1 | MULTISPECIES: FOF1 ATP synthase subunit beta                          | Rahnella sp.       |
| WP_015699282.1 | glutamine--fructose-6-phosphate transaminase (isomerizing)            | Rahnella aquatilis |
| WP_037033577.1 | MULTISPECIES: transaldolase                                           | Rahnella sp.       |
| WP_037035133.1 | MULTISPECIES: proline--tRNA ligase                                    | Rahnella sp.       |
| WP_037035301.1 | MULTISPECIES: pyruvate kinase PykF                                    | Rahnella sp.       |
| WP_037035864.1 | MULTISPECIES: ATP-independent periplasmic protein-refolding chaperone | Rahnella sp.       |
| WP_037037332.1 | MULTISPECIES: ACP S-malonyltransferase                                | Rahnella sp.       |
| WP_037038559.1 | NADH-quinone oxidoreductase subunit C/D                               | Rahnella aquatilis |
| WP_041673196.1 | MULTISPECIES: NADH-quinone oxidoreductase subunit NuoE                | Rahnella sp.       |

| Protein code   | Protein identification                                                                                     | Reference organism |
|----------------|------------------------------------------------------------------------------------------------------------|--------------------|
| WP_047605728.1 | purine-nucleoside phosphorylase                                                                            | Rahnella aquatilis |
| WP_047605737.1 | zinc-binding alcohol dehydrogenase family protein                                                          | Rahnella aquatilis |
| WP_047606028.1 | L,D-transpeptidase family protein                                                                          | Rahnella aquatilis |
| WP_047606070.1 | alcohol dehydrogenase AdhP                                                                                 | Rahnella aquatilis |
| WP_047606344.1 | aminopeptidase N                                                                                           | Rahnella aquatilis |
| WP_047606403.1 | aspartate aminotransferase family protein                                                                  | Rahnella aquatilis |
| WP_047606593.1 | DNA topoisomerase (ATP-hydrolyzing) subunit B                                                              | Rahnella aquatilis |
| WP_047606852.1 | 3-deoxy-8-phosphooctulonate synthase                                                                       | Rahnella aquatilis |
| WP_047607346.1 | aminopeptidase PepB                                                                                        | Rahnella aquatilis |
| WP_047607355.1 | serine hydroxymethyltransferase                                                                            | Rahnella aquatilis |
| WP_047607742.1 | trifunctional transcriptional regulator/proline dehydrogenase/L-glutamate gamma-semialdehyde dehydrogenase | Rahnella aquatilis |
| WP_047607744.1 | cystine ABC transporter substrate-binding protein                                                          | Rahnella aquatilis |
| WP_047608290.1 | glutamate--ammonia ligase                                                                                  | Rahnella aquatilis |
| WP_047608317.1 | transketolase                                                                                              | Rahnella aquatilis |
| WP_047608551.1 | ABC transporter substrate-binding protein                                                                  | Rahnella aquatilis |
| WP_047608595.1 | NADH-quinone oxidoreductase subunit NuoG                                                                   | Rahnella aquatilis |
| WP_047608630.1 | 50S ribosomal protein L3                                                                                   | Rahnella aquatilis |
| WP_047608693.1 | DNA starvation/stationary phase protection protein Dps                                                     | Rahnella aquatilis |
| WP_047608834.1 | N-acetylglucosamine-6-phosphate deacetylase                                                                | Rahnella aquatilis |
| WP_047608839.1 | LPS assembly lipoprotein LptE                                                                              | Rahnella aquatilis |
| WP_047608889.1 | phosphoribosylaminoimidazolesuccinocarboxamide synthase                                                    | Rahnella aquatilis |
| WP_047609265.1 | iron-sulfur cluster carrier protein ApbC                                                                   | Rahnella aquatilis |
| WP_047609285.1 | NADP-dependent phosphogluconate dehydrogenase                                                              | Rahnella aquatilis |
| WP_047609302.1 | chemotaxis protein CheW                                                                                    | Rahnella aquatilis |
| WP_047609330.1 | protein phosphatase CheZ                                                                                   | Rahnella aquatilis |
| WP_047609634.1 | glutathione transferase Gsta                                                                               | Rahnella aquatilis |
| WP_047609790.1 | murein transglycosylase                                                                                    | Rahnella aquatilis |
| WP_047609795.1 | phosphopentomutase                                                                                         | Rahnella aquatilis |
| WP_047609862.1 | aspartate-semialdehyde dehydrogenase                                                                       | Rahnella aquatilis |
| WP_047609936.1 | glycine--tRNA ligase subunit beta                                                                          | Rahnella aquatilis |
| WP_047611609.1 | lysine--tRNA ligase                                                                                        | Rahnella aquatilis |
| WP_047612217.1 | excinuclease ABC subunit UvrA                                                                              | Rahnella aquatilis |
| WP_047612647.1 | ribonuclease R                                                                                             | Rahnella aquatilis |
| WP_047612656.1 | translation initiation factor IF-2                                                                         | Rahnella aquatilis |
| WP_047612675.1 | anaerobic ribonucleoside-triphosphate reductase                                                            | Rahnella aquatilis |
| WP_047612676.1 | alpha,alpha-phosphotrehalase                                                                               | Rahnella aquatilis |
| WP_047612794.1 | assimilatory sulfite reductase (NADPH) hemoprotein subunit                                                 | Rahnella aquatilis |
| WP_047612859.1 | pitrilysin                                                                                                 | Rahnella aquatilis |
| WP_052184388.1 | MetQ/NlpA family lipoprotein                                                                               | Rahnella aquatilis |
| WP_056772785.1 | MULTISPECIES: 30S ribosomal protein S16                                                                    | Yersiniaceae       |
| WP_056778537.1 | MULTISPECIES: 1-phosphofructokinase                                                                        | Yersiniaceae       |
| WP_056781756.1 | MULTISPECIES: DUF3461 family protein                                                                       | Yersiniaceae       |
| WP_071823626.1 | MULTISPECIES: ribose-phosphate pyrophosphokinase                                                           | Rahnella sp.       |
| WP_081481095.1 | MULTISPECIES: co-chaperone GroES                                                                           | Yersiniaceae       |
| WP_081481112.1 | MULTISPECIES: transcription antiterminator/RNA stability regulator CspE                                    | Rahnella sp.       |
| WP_086935265.1 | MULTISPECIES: 3-hydroxyacyl-ACP dehydratase FabZ                                                           | Rahnella sp.       |
| WP_086935273.1 | MULTISPECIES: glyceraldehyde-3-phosphate dehydrogenase                                                     | Yersiniaceae       |
| WP_086935295.1 | 30S ribosomal protein S1                                                                                   | Rahnella aquatilis |
| WP_095923131.1 | MULTISPECIES: D-sedoheptulose 7-phosphate isomerase                                                        | Rahnella sp.       |
| WP_095923207.1 | MULTISPECIES: 3-hydroxyacyl-ACP dehydratase FabZ                                                           | Rahnella sp.       |
| WP_095923217.1 | MULTISPECIES: 30S ribosomal protein S2                                                                     | Rahnella sp.       |
| WP_095923499.1 | MULTISPECIES: 50S ribosomal protein L19                                                                    | Rahnella sp.       |
| WP_095923752.1 | MULTISPECIES: 50S ribosomal protein L24                                                                    | Rahnella sp.       |
| WP_095924049.1 | MULTISPECIES: F0F1 ATP synthase subunit beta                                                               | Rahnella sp.       |
| WP_095924051.1 | MULTISPECIES: F0F1 ATP synthase subunit B                                                                  | Rahnella sp.       |
| WP_095924286.1 | DNA-directed RNA polymerase subunit beta'                                                                  | Rahnella sp.       |
| WP_095924349.1 | MULTISPECIES: single-stranded DNA-binding protein                                                          | Rahnella sp.       |
| WP_095924927.1 | MULTISPECIES: peroxiredoxin C                                                                              | Rahnella sp.       |
| WP_095924936.1 | MULTISPECIES: 6,7-dimethyl-8-ribityllumazine synthase                                                      | Rahnella sp.       |
| WP_095925026.1 | MULTISPECIES: uracil phosphoribosyltransferase                                                             | Rahnella sp.       |



| Protein code   | Protein identification                                                                                          | Reference organism |
|----------------|-----------------------------------------------------------------------------------------------------------------|--------------------|
| WP_095925051.1 | MULTISPECIES: bifunctional methylenetetrahydrofolate dehydrogenase/methenyltetrahydrofolate cyclohydrolase Fold | Rahnella sp.       |
| WP_101077378.1 | MULTISPECIES: succinate--CoA ligase subunit alpha                                                               | Rahnella sp.       |
| WP_101079205.1 | MULTISPECIES: acetyl-CoA carboxylase carboxyl transferase subunit alpha                                         | Rahnella sp.       |
| WP_101079222.1 | MULTISPECIES: 2,3,4,5-tetrahydropyridine-2,6-dicarboxylate N-succinyltransferase                                | Rahnella sp.       |
| WP_112151011.1 | MULTISPECIES: thymidine phosphorylase                                                                           | Rahnella sp.       |
| WP_112151804.1 | MULTISPECIES: aspartate--tRNA ligase                                                                            | Rahnella sp.       |
| WP_112151951.1 | MULTISPECIES: glutathione-disulfide reductase                                                                   | Rahnella sp.       |
| WP_112152041.1 | MULTISPECIES: UDP-N-acetylmuramate:L-alanyl-gamma-D-glutamyl-meso-diaminopimelate ligase                        | Rahnella sp.       |
| WP_112152056.1 | MULTISPECIES: alpha,alpha-phosphotrehalase                                                                      | Rahnella sp.       |
| WP_112152149.1 | MULTISPECIES: PTS mannose transporter subunit IIAB                                                              | Rahnella sp.       |
| WP_112168192.1 | MULTISPECIES: two-component system response regulator ArcA                                                      | Rahnella sp.       |
| WP_112197122.1 | MULTISPECIES: undecaprenyl-phosphate 4-deoxy-4-formamido-L-arabinose transferase                                | Rahnella sp.       |
| WP_112197123.1 | MULTISPECIES: bifunctional UDP-4-amino-4-deoxy-L-arabinose formyltransferase/UDP-glucuronic acid oxidase ArnA   | Rahnella sp.       |
| WP_112198666.1 | MULTISPECIES: ribonucleotide-diphosphate reductase subunit beta                                                 | Rahnella sp.       |
| WP_112198685.1 | MULTISPECIES: redox-regulated ATPase YchF                                                                       | Rahnella sp.       |
| WP_112286789.1 | MULTISPECIES: translation initiation factor IF-2                                                                | Rahnella sp.       |
| WP_112286790.1 | MULTISPECIES: transcription termination/antitermination protein NusA                                            | Rahnella sp.       |
| WP_112286795.1 | MULTISPECIES: ATP-dependent zinc metalloprotease FtsH                                                           | Rahnella sp.       |
| WP_112286828.1 | MULTISPECIES: protease modulator HflC                                                                           | Rahnella sp.       |
| WP_112286849.1 | MULTISPECIES: signal recognition particle protein                                                               | Rahnella sp.       |
| WP_112286851.1 | MULTISPECIES: S-ribosylhomocysteine lyase                                                                       | Rahnella sp.       |
| WP_112286910.1 | MULTISPECIES: bifunctional aconitate hydratase 2/2-methylisocitrate dehydratase                                 | Rahnella sp.       |
| WP_112286922.1 | MULTISPECIES: dihydrolipoyl dehydrogenase                                                                       | Rahnella sp.       |
| WP_112286924.1 | MULTISPECIES: pyruvate dehydrogenase (acetyl-transferring), homodimeric type                                    | Rahnella sp.       |
| WP_112286939.1 | MULTISPECIES: preprotein translocase subunit SecA                                                               | Rahnella sp.       |
| WP_112286943.1 | MULTISPECIES: cell division protein FtsZ                                                                        | Rahnella sp.       |
| WP_112286987.1 | MULTISPECIES: carbamoyl-phosphate synthase large subunit                                                        | Rahnella sp.       |
| WP_112287000.1 | MULTISPECIES: molecular chaperone DnaJ                                                                          | Rahnella sp.       |
| WP_112287226.1 | MULTISPECIES: heat shock chaperone IbpA                                                                         | Rahnella sp.       |
| WP_112287456.1 | MULTISPECIES: ABC transporter substrate-binding protein                                                         | Rahnella sp.       |
| WP_112287489.1 | MULTISPECIES: protein translocase subunit SecD                                                                  | Rahnella sp.       |
| WP_112287507.1 | MULTISPECIES: trigger factor                                                                                    | Rahnella sp.       |
| WP_112287508.1 | MULTISPECIES: ATP-dependent protease ATP-binding subunit ClpX                                                   | Rahnella sp.       |
| WP_112287544.1 | MULTISPECIES: adenylate kinase                                                                                  | Rahnella sp.       |
| WP_112287579.1 | MULTISPECIES: thioredoxin-dependent thiol peroxidase                                                            | Rahnella sp.       |
| WP_112287581.1 | MULTISPECIES: outer membrane protein assembly factor BamC                                                       | Rahnella sp.       |
| WP_112287628.1 | MULTISPECIES: D-alanyl-D-alanine carboxypeptidase DacA                                                          | Rahnella sp.       |
| WP_112287808.1 | MULTISPECIES: RNA polymerase-binding protein DksA                                                               | Rahnella sp.       |
| WP_112287850.1 | MULTISPECIES: elongation factor P-like protein YeiP                                                             | Rahnella sp.       |
| WP_112288137.1 | MULTISPECIES: 50S ribosomal protein L2                                                                          | Rahnella sp.       |
| WP_112288138.1 | MULTISPECIES: 50S ribosomal protein L6                                                                          | Rahnella sp.       |
| WP_112288147.1 | MULTISPECIES: peptide deformylase                                                                               | Rahnella sp.       |
| WP_112288177.1 | MULTISPECIES: autonomous glycyl radical cofactor GrcA                                                           | Rahnella sp.       |
| WP_112288325.1 | MULTISPECIES: elongation factor Ts                                                                              | Rahnella sp.       |
| WP_112288331.1 | MULTISPECIES: outer membrane protein assembly factor BamA                                                       | Rahnella sp.       |
| WP_112288332.1 | MULTISPECIES: molecular chaperone Skp                                                                           | Rahnella sp.       |
| WP_112288368.1 | MULTISPECIES: LPS export ABC transporter ATP-binding protein                                                    | Rahnella sp.       |
| WP_112288379.1 | MULTISPECIES: UDP-N-acetylglucosamine 1-carboxyvinyltransferase                                                 | Rahnella sp.       |
| WP_112288384.1 | MULTISPECIES: stringent starvation protein A                                                                    | Rahnella sp.       |
| WP_112288545.1 | MULTISPECIES: 50S ribosomal protein L10                                                                         | Rahnella sp.       |
| WP_112288599.1 | MULTISPECIES: peptidylprolyl isomerase                                                                          | Rahnella sp.       |
| WP_112288878.1 | MULTISPECIES: energy-dependent translational throttle protein EttA                                              | Rahnella sp.       |
| WP_112288890.1 | MULTISPECIES: transketolase                                                                                     | Rahnella sp.       |

| Protein code   | Protein identification                                                                    | Reference organism |
|----------------|-------------------------------------------------------------------------------------------|--------------------|
| WP_112288984.1 | MULTISPECIES: class II fructose-bisphosphate aldolase                                     | Rahnella sp.       |
| WP_112288996.1 | MULTISPECIES: methionine adenosyltransferase                                              | Rahnella sp.       |
| WP_112289028.1 | MULTISPECIES: thymidine phosphorylase                                                     | Rahnella sp.       |
| WP_112289029.1 | MULTISPECIES: deoxyribose-phosphate aldolase                                              | Rahnella sp.       |
| WP_112289032.1 | MULTISPECIES: molecular chaperone OsmY                                                    | Rahnella sp.       |
| WP_112289179.1 | MULTISPECIES: citrate synthase                                                            | Rahnella sp.       |
| WP_112289181.1 | MULTISPECIES: succinate dehydrogenase flavoprotein subunit                                | Rahnella sp.       |
| WP_112289184.1 | MULTISPECIES: cytochrome ubiquinol oxidase subunit I                                      | Rahnella sp.       |
| WP_112289187.1 | MULTISPECIES: Tol-Pal system protein TolB                                                 | Rahnella sp.       |
| WP_112289283.1 | MULTISPECIES: thiol:disulfide interchange protein DsbA                                    | Rahnella sp.       |
| WP_112289290.1 | MULTISPECIES: ribosome-dependent GTPase TypA                                              | Rahnella sp.       |
| WP_112289323.1 | MULTISPECIES: ADP-glyceromanno-heptose 6-epimerase                                        | Rahnella sp.       |
| WP_112289334.1 | MULTISPECIES: 6-phosphofructokinase                                                       | Rahnella sp.       |
| WP_112289342.1 | MULTISPECIES: glycerol kinase GlpK                                                        | Rahnella sp.       |
| WP_112289354.1 | MULTISPECIES: phosphoenolpyruvate carboxylase                                             | Rahnella sp.       |
| WP_112289432.1 | MULTISPECIES: outer membrane protein OmpX                                                 | Rahnella sp.       |
| WP_112289497.1 | MULTISPECIES: DNA topoisomerase (ATP-hydrolyzing) subunit A                               | Rahnella sp.       |
| WP_112289500.1 | MULTISPECIES: ribonucleoside-diphosphate reductase subunit alpha                          | Rahnella sp.       |
| WP_112289754.1 | MULTISPECIES: chaperonin GroEL                                                            | Rahnella sp.       |
| WP_112289929.1 | MULTISPECIES: NADH-quinone oxidoreductase subunit Nuof                                    | Rahnella sp.       |
| WP_112290300.1 | MULTISPECIES: ATP-dependent RNA helicase RhlB                                             | Rahnella sp.       |
| WP_112290409.1 | MULTISPECIES: acetyl-CoA carboxylase biotin carboxylase subunit                           | Rahnella sp.       |
| WP_112290456.1 | MULTISPECIES: glycine betaine/L-proline ABC transporter substrate-binding protein ProX    | Rahnella sp.       |
| WP_112290596.1 | MULTISPECIES: outer membrane protein assembly factor BamD                                 | Rahnella sp.       |
| WP_112290698.1 | MULTISPECIES: sulfate ABC transporter substrate-binding protein                           | Rahnella sp.       |
| WP_112290707.1 | MULTISPECIES: PTS glucose transporter subunit IIA                                         | Rahnella sp.       |
| WP_112290709.1 | MULTISPECIES: phosphoenolpyruvate-protein phosphotransferase PtsI                         | Rahnella sp.       |
| WP_112290710.1 | MULTISPECIES: cysteine synthase A                                                         | Rahnella sp.       |
| WP_112290844.1 | MULTISPECIES: ribose ABC transporter substrate-binding protein RbsB                       | Rahnella sp.       |
| WP_112290861.1 | MULTISPECIES: F0F1 ATP synthase subunit gamma                                             | Rahnella sp.       |
| WP_112290864.1 | MULTISPECIES: glutamine--fructose-6-phosphate transaminase (isomerizing)                  | Rahnella sp.       |
| WP_112290918.1 | MULTISPECIES: xanthine phosphoribosyltransferase                                          | Rahnella sp.       |
| WP_112290958.1 | MULTISPECIES: 4-hydroxy-3-polyprenylbenzoate decarboxylase                                | Rahnella sp.       |
| WP_112291457.1 | MULTISPECIES: recombinase RecA                                                            | Rahnella sp.       |
| WP_112291485.1 | MULTISPECIES: nucleoside-specific channel-forming protein Tsx                             | Rahnella sp.       |
| WP_112291869.1 | MULTISPECIES: 2,3-diphosphoglycerate-dependent phosphoglycerate mutase                    | Rahnella sp.       |
| WP_112291902.1 | MULTISPECIES: transaldolase                                                               | Rahnella sp.       |
| WP_113875968.1 | MULTISPECIES: serine hydroxymethyltransferase                                             | Rahnella sp.       |
| WP_113875973.1 | inositol-1-monophosphatase                                                                | Rahnella aquatilis |
| WP_113875978.1 | MULTISPECIES: histidine--tRNA ligase                                                      | Rahnella sp.       |
| WP_113875981.1 | MULTISPECIES: ribosome biogenesis GTPase Der                                              | Rahnella sp.       |
| WP_113876027.1 | MULTISPECIES: ADP-forming succinate--CoA ligase subunit beta                              | Rahnella sp.       |
| WP_113876048.1 | glutamine--tRNA ligase                                                                    | Rahnella aquatilis |
| WP_113876050.1 | MULTISPECIES: N-acetylglucosamine-6-phosphate deacetylase                                 | Rahnella sp.       |
| WP_113876055.1 | MULTISPECIES: PhoH family protein                                                         | Rahnella sp.       |
| WP_113876058.1 | MULTISPECIES: leucine--tRNA ligase                                                        | Rahnella sp.       |
| WP_113876146.1 | MULTISPECIES: cytochrome o ubiquinol oxidase subunit I                                    | Rahnella sp.       |
| WP_113876187.1 | MULTISPECIES: elongation factor 4                                                         | Rahnella sp.       |
| WP_113876194.1 | MULTISPECIES: nucleotide exchange factor GrpE                                             | Rahnella sp.       |
| WP_113876237.1 | HD domain-containing protein                                                              | Rahnella aquatilis |
| WP_113876297.1 | phosphopentomutase                                                                        | Rahnella aquatilis |
| WP_113876315.1 | isoleucine--tRNA ligase                                                                   | Rahnella aquatilis |
| WP_113876357.1 | MULTISPECIES: pyruvate dehydrogenase complex dihydrolipoylysine-residue acetyltransferase | Rahnella sp.       |
| WP_113876396.1 | MULTISPECIES: serine endoprotease DegP                                                    | Rahnella sp.       |
| WP_113876539.1 | MetQ/NlpA family lipoprotein                                                              | Rahnella aquatilis |
| WP_113876559.1 | phage tail tape measure protein                                                           | Rahnella aquatilis |

| Protein code   | Protein identification                                                   | Reference organism |
|----------------|--------------------------------------------------------------------------|--------------------|
| WP_113876669.1 | MULTISPECIES: glucose-6-phosphate isomerase                              | Rahnella sp.       |
| WP_113876759.1 | MULTISPECIES: valine--tRNA ligase                                        | Rahnella sp.       |
| WP_113876789.1 | lysine-sensitive aspartokinase 3                                         | Rahnella aquatilis |
| WP_113876814.1 | MULTISPECIES: NAD(P)H-dependent oxidoreductase                           | Rahnella sp.       |
| WP_113876859.1 | MULTISPECIES: superoxide dismutase Mn                                    | Rahnella sp.       |
| WP_113876926.1 | peptidyl-dipeptidase Dcp                                                 | Rahnella aquatilis |
| WP_113876936.1 | MULTISPECIES: glutathione-disulfide reductase                            | Rahnella sp.       |
| WP_113876955.1 | glutamate--tRNA ligase                                                   | Rahnella aquatilis |
| WP_113877028.1 | MULTISPECIES: acetyl-CoA carboxylase, carboxyltransferase subunit beta   | Rahnella sp.       |
| WP_113877044.1 | acetate kinase                                                           | Rahnella aquatilis |
| WP_113877045.1 | MULTISPECIES: sugar phosphatase                                          | Rahnella sp.       |
| WP_113877047.1 | MULTISPECIES: pyridoxal phosphate-dependent aminotransferase             | Rahnella sp.       |
| WP_113877056.1 | MULTISPECIES: catalase                                                   | Rahnella sp.       |
| WP_113877073.1 | aspartate ammonia-lyase                                                  | Rahnella aquatilis |
| WP_113877087.1 | MULTISPECIES: FtsH protease activity modulator HfIK                      | Rahnella sp.       |
| WP_113877088.1 | MULTISPECIES: adenylosuccinate synthase                                  | Rahnella sp.       |
| WP_113877103.1 | MULTISPECIES: malate dehydrogenase                                       | Rahnella sp.       |
| WP_113877112.1 | MULTISPECIES: polyribonucleotide nucleotidyltransferase                  | Rahnella sp.       |
| WP_113877113.1 | MULTISPECIES: DEAD/DEAH family ATP-dependent RNA helicase                | Rahnella sp.       |
| WP_113877151.1 | maltose/maltodextrin ABC transporter substrate-binding protein Male      | Rahnella aquatilis |
| WP_113877173.1 | DUF853 domain-containing protein                                         | Rahnella aquatilis |
| WP_113877246.1 | FKBP-type peptidyl-prolyl cis-trans isomerase                            | Rahnella aquatilis |
| WP_113877256.1 | diaminobutyrate--2-oxoglutarate transaminase                             | Rahnella aquatilis |
| WP_113877369.1 | RNA polymerase sigma factor RpoD                                         | Rahnella aquatilis |
| WP_113877382.1 | DNA topoisomerase IV subunit A                                           | Rahnella aquatilis |
| WP_113877398.1 | CTP synthase (glutamine hydrolyzing)                                     | Rahnella aquatilis |
| WP_113877411.1 | MULTISPECIES: murein hydrolase activator NlpD                            | Rahnella sp.       |
| WP_113877444.1 | FliC/FljB family flagellin                                               | Rahnella aquatilis |
| WP_113877445.1 | FliC/FljB family flagellin                                               | Rahnella aquatilis |
| WP_113877475.1 | MULTISPECIES: fused PTS fructose transporter subunit IIA/HPr protein     | Rahnella sp.       |
| WP_113877481.1 | MULTISPECIES: porin                                                      | Rahnella sp.       |
| WP_113877533.1 | glycine betaine/L-proline ABC transporter substrate-binding protein ProX | Rahnella aquatilis |
| WP_113877598.1 | N-acetylmuramoyl-L-alanine amidase                                       | Rahnella aquatilis |
| WP_113877602.1 | pitrilysin                                                               | Rahnella aquatilis |
| WP_113877622.1 | MULTISPECIES: sulfate ABC transporter substrate-binding protein          | Rahnella sp.       |
| WP_113877630.1 | glycine C-acetyltransferase                                              | Rahnella aquatilis |
| WP_113877644.1 | MULTISPECIES: orotate phosphoribosyltransferase                          | Rahnella sp.       |
| WP_113877923.1 | 3-deoxy-7-phosphoheptulonate synthase AroG                               | Rahnella aquatilis |
| WP_113878003.1 | MULTISPECIES: NAD(P)H-flavin reductase                                   | Rahnella sp.       |
| WP_113878010.1 | 5-methyltetrahydropteroyltriglutamate--homocysteine S-methyltransferase  | Rahnella aquatilis |
| WP_113878090.1 | MULTISPECIES: DNA helicase II                                            | Rahnella sp.       |
| WP_113878108.1 | ketol-acid reductoisomerase                                              | Rahnella aquatilis |
| WP_113878162.1 | phosphomannomutase CpsG                                                  | Rahnella aquatilis |
| WP_113878167.1 | class I fructose-bisphosphate aldolase                                   | Rahnella aquatilis |
| WP_113878210.1 | proline--tRNA ligase                                                     | Rahnella aquatilis |
| WP_113878222.1 | UMP kinase                                                               | Rahnella aquatilis |
| WP_113878238.1 | transketolase                                                            | Rahnella aquatilis |
| WP_113878239.1 | MULTISPECIES: phosphoglycerate kinase                                    | Rahnella sp.       |
| WP_113878243.1 | MULTISPECIES: oxidative stress defense protein                           | Rahnella sp.       |
| WP_113878247.1 | phosphoglycerate dehydrogenase                                           | Rahnella aquatilis |
| WP_113878254.1 | aminomethyl-transferring glycine dehydrogenase                           | Rahnella aquatilis |
| WP_113878291.1 | MULTISPECIES: Trk system potassium transporter TrkA                      | Rahnella sp.       |
| WP_119261052.1 | DNA topoisomerase (ATP-hydrolyzing) subunit B                            | Rahnella aquatilis |
| WP_119261115.1 | two-component system response regulator OmpR                             | Rahnella aquatilis |
| WP_119261123.1 | nitrite reductase large subunit                                          | Rahnella aquatilis |
| WP_119261152.1 | succinate dehydrogenase/fumarate reductase iron-sulfur subunit           | Rahnella aquatilis |
| WP_119261153.1 | fumarate reductase (quinol) flavoprotein subunit                         | Rahnella aquatilis |



| Protein code   | Protein identification                                                                    | Reference organism |
|----------------|-------------------------------------------------------------------------------------------|--------------------|
| WP_119261168.1 | DEAD/DEAH family ATP-dependent RNA helicase                                               | Rahnella aquatilis |
| WP_119261248.1 | alanine--tRNA ligase                                                                      | Rahnella aquatilis |
| WP_119261297.1 | MetQ/NlpA family lipoprotein                                                              | Rahnella aquatilis |
| WP_119261318.1 | glutamate 5-kinase                                                                        | Rahnella aquatilis |
| WP_119261434.1 | aspartate/tyrosine/aromatic aminotransferase                                              | Rahnella aquatilis |
| WP_119261438.1 | bifunctional 3-hydroxydecanoyl-ACP dehydratase/trans-2-decenoyl-ACP isomerase             | Rahnella aquatilis |
| WP_119261653.1 | Re/Si-specific NAD(P)(+) transhydrogenase subunit alpha                                   | Rahnella aquatilis |
| WP_119261728.1 | porin OmpC                                                                                | Rahnella aquatilis |
| WP_119261854.1 | alpha-D-glucose phosphate-specific phosphoglucomutase                                     | Rahnella aquatilis |
| WP_119261859.1 | lipoyl synthase                                                                           | Rahnella aquatilis |
| WP_119261922.1 | glycine cleavage system aminomethyltransferase GcvT                                       | Rahnella aquatilis |
| WP_119261924.1 | ribose-5-phosphate isomerase RpiA                                                         | Rahnella aquatilis |
| WP_119262138.1 | Do family serine endopeptidase                                                            | Rahnella aquatilis |
| WP_119262197.1 | triose-phosphate isomerase                                                                | Rahnella aquatilis |
| WP_121019126.1 | bifunctional phosphoribosylaminoimidazolecarboxamide formyltransferase/IMP cyclohydrolase | Rahnella aquatilis |
| WP_121019215.1 | oligopeptide ABC transporter substrate-binding protein OppA                               | Rahnella aquatilis |
| WP_121019217.1 | tryptophan synthase subunit beta                                                          | Rahnella aquatilis |
| WP_121019425.1 | chemotaxis protein CheA                                                                   | Rahnella aquatilis |
| WP_121019630.1 | MULTISPECIES: porin OmpC                                                                  | Rahnella sp.       |
| WP_121019727.1 | polysaccharide export protein                                                             | Rahnella aquatilis |
| WP_121019733.1 | phosphomannomutase CpsG                                                                   | Rahnella aquatilis |
| WP_121019993.1 | phosphoenolpyruvate carboxykinase (ATP)                                                   | Rahnella aquatilis |
| WP_121020019.1 | MULTISPECIES: insulinase family protein                                                   | Rahnella sp.       |
| WP_121020032.1 | glycine--tRNA ligase subunit beta                                                         | Rahnella aquatilis |
| WP_121020042.1 | 2-oxoglutarate dehydrogenase E1 component                                                 | Rahnella aquatilis |
| WP_121020187.1 | PLP-dependent aminotransferase family protein                                             | Rahnella aquatilis |
| WP_126124167.1 | phospholipid-binding lipoprotein MlaA                                                     | Rahnella aquatilis |
| WP_126124176.1 | ATP phosphoribosyltransferase                                                             | Rahnella aquatilis |
| WP_126124308.1 | preprotein translocase subunit SecA                                                       | Rahnella aquatilis |
| WP_126124580.1 | oligopeptidase A                                                                          | Rahnella aquatilis |
| WP_126124653.1 | beta-Ala-His dipeptidase                                                                  | Rahnella aquatilis |
| WP_126124678.1 | transaldolase                                                                             | Rahnella aquatilis |
| WP_126124886.1 | DUF945 domain-containing protein                                                          | Rahnella aquatilis |
| WP_126124940.1 | iron uptake system protein EfeO                                                           | Rahnella aquatilis |
| WP_126124945.1 | GrxA family glutaredoxin                                                                  | Rahnella aquatilis |
| WP_126124983.1 | phenylalanine--tRNA ligase subunit beta                                                   | Rahnella aquatilis |
| WP_126124992.1 | MBL fold metallo-hydrolase                                                                | Rahnella aquatilis |
| WP_126125055.1 | 2-oxoglutarate dehydrogenase complex dihydrolipoyllysine-residue succinyltransferase      | Rahnella aquatilis |
| WP_126125223.1 | 2-iminobutanoate/2-iminopropanoate deaminase                                              | Rahnella aquatilis |
| WP_126125249.1 | glycerol-3-phosphate 1-O-acyltransferase PlsB                                             | Rahnella aquatilis |
| WP_126125280.1 | phosphate ABC transporter substrate-binding protein PstS                                  | Rahnella aquatilis |
| WP_131637279.1 | porin OmpC                                                                                | Rahnella aquatilis |
| WP_131637507.1 | type VI secretion system ATPase TssH                                                      | Rahnella aquatilis |
| WP_131637863.1 | NAD-dependent epimerase                                                                   | Rahnella aquatilis |
| WP_131637894.1 | galactonate dehydratase                                                                   | Rahnella aquatilis |
| WP_131638012.1 | phage tail sheath protein                                                                 | Rahnella aquatilis |
| WP_131638044.1 | ribonuclease E                                                                            | Rahnella aquatilis |
| WP_131638158.1 | 4-hydroxy-tetrahydrodipicolinate synthase                                                 | Rahnella aquatilis |
| WP_131638170.1 | molecular chaperone HtpG                                                                  | Rahnella aquatilis |
| WP_131638206.1 | phosphoribosylformylglycinamide synthase                                                  | Rahnella aquatilis |
| WP_131638346.1 | glutamate-1-semialdehyde 2,1-aminomutase                                                  | Rahnella aquatilis |
| WP_131638362.1 | GMP reductase                                                                             | Rahnella aquatilis |
| WP_131638366.1 | glutamine-hydrolyzing carbamoyl-phosphate synthase small subunit                          | Rahnella aquatilis |
| WP_131638370.1 | molecular chaperone DnaK                                                                  | Rahnella aquatilis |
| WP_131638459.1 | RNA-binding transcriptional accessory protein                                             | Rahnella aquatilis |
| WP_131638465.1 | glycerol-3-phosphate dehydrogenase                                                        | Rahnella aquatilis |
| WP_131638510.1 | heat shock chaperone IbpB                                                                 | Rahnella aquatilis |
| WP_131638522.1 | guanylate kinase                                                                          | Rahnella aquatilis |
| WP_131638540.1 | glycine C-acetyltransferase                                                               | Rahnella aquatilis |

| Protein code   | Protein identification                                                     | Reference organism |
|----------------|----------------------------------------------------------------------------|--------------------|
| WP_131638567.1 | dipeptidase PepE                                                           | Rahnella aquatilis |
| WP_131638597.1 | phospholipid-binding protein MlaC                                          | Rahnella aquatilis |
| WP_131638630.1 | NADPH-dependent assimilatory sulfite reductase flavoprotein subunit        | Rahnella aquatilis |
| WP_131638703.1 | alanine transaminase                                                       | Rahnella aquatilis |
| WP_131638762.1 | S-(hydroxymethyl)glutathione dehydrogenase/class III alcohol dehydrogenase | Rahnella aquatilis |
| WP_131638766.1 | ATP-dependent Clp protease ATP-binding subunit ClpA                        | Rahnella aquatilis |
| WP_147243271.1 | MULTISPECIES: ribosome maturation factor RimP                              | Rahnella sp.       |
| WP_147423484.1 | methionine--tRNA ligase                                                    | Rahnella aquatilis |
| WP_148271887.1 | leucyl aminopeptidase                                                      | Rahnella aquatilis |

**Table S2.** Identified proteins in Sp2 (*Serratia plymuthica*).

| Protein code | Protein identification                                                       | Reference organism               |
|--------------|------------------------------------------------------------------------------|----------------------------------|
| AGO53372.1   | Phosphoglucosamine mutase GlmM                                               | <i>Serratia plymuthica</i> 4Rx13 |
| AGO53866.1   | Transporter                                                                  | <i>Serratia plymuthica</i> 4Rx13 |
| AGO53983.1   | YbbN                                                                         | <i>Serratia plymuthica</i> 4Rx13 |
| AGO54427.1   | Methionine-tRNA ligase MetG                                                  | <i>Serratia plymuthica</i> 4Rx13 |
| AGO54965.1   | Phosphoenolpyruvate synthase PpsA                                            | <i>Serratia plymuthica</i> 4Rx13 |
| AGO54981.1   | Riboflavin synthase rRbE                                                     | <i>Serratia plymuthica</i> 4Rx13 |
| AGO55780.1   | Methyl-accepting chemotaxis serine transducer                                | <i>Serratia plymuthica</i> 4Rx13 |
| AGO55878.1   | Alpha-galactosidase MeIA                                                     | <i>Serratia plymuthica</i> 4Rx13 |
| AGO57515.1   | Vitamin B12 transporter BtuB                                                 | <i>Serratia plymuthica</i> 4Rx13 |
| AGP46727.1   | Hypothetical protein M621_02115                                              | <i>Serratia plymuthica</i> S13   |
| AHY05214.1   | Hypothetical protein sch_01130                                               | <i>Serratia plymuthica</i>       |
| AHY05458.1   | Hypothetical protein sch_02450                                               | <i>Serratia plymuthica</i>       |
| AHY05506.1   | Hypothetical protein sch_02715                                               | <i>Serratia plymuthica</i>       |
| AHY05780.1   | Tail sheath protein                                                          | <i>Serratia plymuthica</i>       |
| AHY05781.1   | Tail assembly protein                                                        | <i>Serratia plymuthica</i>       |
| AHY05782.1   | Phage tail protein                                                           | <i>Serratia plymuthica</i>       |
| AHY05833.1   | Ligand-gated channel protein                                                 | <i>Serratia plymuthica</i>       |
| AHY05874.1   | Glycerophosphodiester phosphodiesterase                                      | <i>Serratia plymuthica</i>       |
| AHY06324.1   | Succinate-semialdehyde dehydrogenase                                         | <i>Serratia plymuthica</i>       |
| AHY06546.1   | Phosphomannomutase                                                           | <i>Serratia plymuthica</i>       |
| AHY06610.1   | Lipoprotein                                                                  | <i>Serratia plymuthica</i>       |
| AHY06682.1   | Aminopeptidase N                                                             | <i>Serratia plymuthica</i>       |
| AHY07005.1   | Hypothetical protein sch_10780                                               | <i>Serratia plymuthica</i>       |
| AHY07155.1   | ABC transporter substrate-binding protein                                    | <i>Serratia plymuthica</i>       |
| AHY07389.1   | Entry exclusion protein 2                                                    | <i>Serratia plymuthica</i>       |
| AHY08628.1   | Nitrate reductase                                                            | <i>Serratia plymuthica</i>       |
| AHY08795.1   | NAD synthetase                                                               | <i>Serratia plymuthica</i>       |
| AHY09250.1   | Filamentous hemagglutinin                                                    | <i>Serratia plymuthica</i>       |
| AHY09484.1   | Membrane protein                                                             | <i>Serratia plymuthica</i>       |
| AHY09490.1   | Hemolysin                                                                    | <i>Serratia plymuthica</i>       |
| AHY09911.1   | Hypothetical protein sch_10595                                               | <i>Serratia plymuthica</i>       |
| ANJ91604.1   | Chitin-binding protein                                                       | <i>Serratia plymuthica</i>       |
| ANJ92775.1   | Signal recognition particle                                                  | <i>Serratia plymuthica</i>       |
| ANJ93567.1   | Hypothetical protein ADP72_11505                                             | <i>Serratia plymuthica</i>       |
| ANJ96163.1   | Hypothetical protein ADP72_25480                                             | <i>Serratia plymuthica</i>       |
| AYG77889.1   | RNA polymerase II subunit, partial                                           | <i>Alternaria tenuissima</i>     |
| KYG15170.1   | Filamentous hemagglutinin                                                    | <i>Serratia plymuthica</i>       |
| OJT42892.1   | Hypothetical protein BSR04_08075                                             | <i>Serratia plymuthica</i>       |
| pdb          | 3GBE                                                                         |                                  |
| RMN16896.1   | Hypothetical protein ALQ63_00259                                             | <i>Serratia plymuthica</i>       |
| RMN17212.1   | Hypothetical protein ALQ63_01830                                             | <i>Serratia plymuthica</i>       |
| RMN17366.1   | Hypothetical protein ALQ63_02794                                             | <i>Serratia plymuthica</i>       |
| RMN18076.1   | Hypothetical protein ALQ63_02431                                             | <i>Serratia plymuthica</i>       |
| RMN18164.1   | Hypothetical protein ALQ63_00091                                             | <i>Serratia plymuthica</i>       |
| RMN18602.1   | Hypothetical protein ALQ63_02924                                             | <i>Serratia plymuthica</i>       |
| RMN18940.1   | Hypothetical protein ALQ63_04066                                             | <i>Serratia plymuthica</i>       |
| RMN19543.1   | Hypothetical protein ALQ63_00888                                             | <i>Serratia plymuthica</i>       |
| RMN19950.1   | Hypothetical protein ALQ63_04057                                             | <i>Serratia plymuthica</i>       |
| RMN20703.1   | Hypothetical protein ALQ63_01148                                             | <i>Serratia plymuthica</i>       |
| RMN20967.1   | Hypothetical protein ALQ63_00124                                             | <i>Serratia plymuthica</i>       |
| SQI30255.1   | ATP-dependent zinc metalloprotease FtsH                                      | <i>Serratia plymuthica</i>       |
| SQI33180.1   | Acriflavine resistance protein A precursor                                   | <i>Serratia plymuthica</i>       |
| SQI34124.1   | Phosphate starvation-inducible protein psiF precursor                        | <i>Serratia plymuthica</i>       |
| SQI39343.1   | Chitinase D precursor                                                        | <i>Serratia plymuthica</i>       |
| SQI45366.1   | PTS-dependent dihydroxyacetone kinase, dihydroxyacetone-binding subunit DhaK | <i>Serratia plymuthica</i>       |
| SQI46070.1   | 30s ribosomal protein S3                                                     | <i>Serratia plymuthica</i>       |
| VEA62507.1   | Aspartokinase I/homoserine dehydrogenase I                                   | <i>Serratia plymuthica</i>       |
| VEA67671.1   | Pyruvate dehydrogenase E1 component                                          | <i>Serratia plymuthica</i>       |
| VEA68775.1   | Ornithine/acetylornithine aminotransferase                                   | <i>Serratia plymuthica</i>       |
| VEI18669.1   | Uncharacterised protein                                                      | <i>Serratia plymuthica</i>       |

| Protein code   | Protein identification                                     | Reference organism  |
|----------------|------------------------------------------------------------|---------------------|
| WP_001181005.1 | 30S ribosomal protein S10                                  | Gammaproteobacteria |
| WP_002210315.1 | Transcription antiterminator/RNA stability regulator CspE  | Yersiniaceae        |
| WP_004090925.1 | cAMP-activated global transcriptional regulator CRP        | Enterobacterales    |
| WP_004093983.1 | 50S ribosomal protein L34                                  | Enterobacterales    |
| WP_004391482.1 | Shikimate kinase AroK                                      | Enterobacterales    |
| WP_004709363.1 | Two-component system response regulator OmpR               | Enterobacterales    |
| WP_004719003.1 | Acyl carrier protein                                       | Enterobacterales    |
| WP_004847623.1 | Nitrogen regulatory protein P-II                           | Enterobacterales    |
| WP_004928318.1 | Leucine-responsive transcriptional regulator Lrp           | Enterobacterales    |
| WP_004929726.1 | 50S ribosomal protein L17                                  | Serratia sp.        |
| WP_004929779.1 | 50S ribosomal protein L4                                   | Enterobacterales    |
| WP_004930426.1 | 30S ribosomal protein S12                                  | Enterobacterales    |
| WP_004932501.1 | 30S ribosomal protein S16                                  | Enterobacterales    |
| WP_004933502.1 | 30S ribosomal protein s15                                  | Proteobacteria      |
| WP_004933536.1 | Ribosome assembly RNA-binding protein YhbY                 | Enterobacterales    |
| WP_004933559.1 | 50S ribosomal protein L27                                  | Enterobacterales    |
| WP_004933561.1 | 50S ribosomal protein L21                                  | Enterobacterales    |
| WP_004941818.1 | 2,3-diphosphoglycerate-dependent phosphoglycerate mutase   | Serratia sp.        |
| WP_004942247.1 | Outer membrane protein OmpX                                | Serratia sp.        |
| WP_004942332.1 | Glutathione ABC transporter substrate-binding protein GsiB | Serratia plymuthica |
| WP_004942358.1 | NAD-dependent malic enzyme                                 | Serratia sp.        |
| WP_004942530.1 | Arginine ABC transporter substrate-binding protein         | Serratia sp.        |
| WP_004942542.1 | Heavy metal-binding domain-containing protein              | Serratia sp.        |
| WP_004942608.1 | Thioredoxin-disulfide reductase                            | Serratia sp.        |
| WP_004942614.1 | Outer membrane lipoprotein chaperone LolA                  | Serratia sp.        |
| WP_004942617.1 | Serine-tRNA ligase                                         | Serratia sp.        |
| WP_004942650.1 | 30S ribosomal protein S1                                   | Serratia sp.        |
| WP_004942697.1 | L,D-transpeptidase                                         | Serratia sp.        |
| WP_004942906.1 | Universal stress protein                                   | Serratia sp.        |
| WP_004943006.1 | Hypothetical protein                                       | Serratia sp.        |
| WP_004943016.1 | YceI family protein                                        | Serratia sp.        |
| WP_004943122.1 | CopC domain-containing protein YobA                        | Serratia sp.        |
| WP_004943136.1 | Trans-2-enoyl-CoA reductase family protein                 | Serratia sp.        |
| WP_004943172.1 | Hypothetical protein                                       | Serratia plymuthica |
| WP_004943364.1 | SDR family oxidoreductase                                  | Serratia sp.        |
| WP_004943591.1 | 50S ribosomal protein L35                                  | Serratia sp.        |
| WP_004943595.1 | 50S ribosomal protein L20                                  | Serratia sp.        |
| WP_004943598.1 | Phenylalanine-tRNA ligase subunit alpha                    | Serratia sp.        |
| WP_004943604.1 | Integration host factor subunit alpha                      | Yersiniaceae        |
| WP_004943717.1 | Major outer membrane lipoprotein                           | Serratia sp.        |
| WP_004943789.1 | Transcriptional regulator SlyA                             | Serratia sp.        |
| WP_004943793.1 | Glycine zipper 2TM domain-containing protein               | Serratia sp.        |
| WP_004944077.1 | Alpha-glucosidase                                          | Serratia plymuthica |
| WP_004944994.1 | DUF1471 domain-containing protein                          | Serratia plymuthica |
| WP_004945038.1 | 2-hydroxyacid dehydrogenase                                | Serratia sp.        |
| WP_004945089.1 | Thiol peroxidase                                           | Serratia sp.        |
| WP_004945257.1 | BON domain-containing protein                              | Serratia sp.        |
| WP_004945391.1 | Glyceraldehyde-3-phosphate dehydrogenase                   | Serratia sp.        |
| WP_004945472.1 | Cell division topological specificity factor MinE          | Serratia sp.        |
| WP_004945505.1 | Pyruvate kinase                                            | Serratia plymuthica |
| WP_004945950.1 | FliC/FljB family flagellin                                 | Serratia plymuthica |
| WP_004945953.1 | Flagellar filament capping protein FljD                    | Serratia sp.        |
| WP_004946072.1 | Flagellar hook-filament junction protein FlgL              | Serratia sp.        |
| WP_004946081.1 | Flagellar basal-body rod protein FlgG                      | Serratia sp.        |
| WP_004946278.1 | Transcription antiterminator/RNA stability regulator CspE  | Yersiniaceae        |
| WP_004946879.1 | DUF1440 domain-containing protein                          | Serratia sp.        |
| WP_004947039.1 | Fused PTS fructose transporter subunit Ila/HPr protein     | Serratia plymuthica |
| WP_004947644.1 | ABC transporter substrate-binding protein                  | Serratia plymuthica |
| WP_004947678.1 | Cysteine synthase A                                        | Serratia sp.        |
| WP_004947686.1 | PTS glucose transporter subunit Ila                        | Serratia sp.        |
| WP_004947713.1 | Sulfate ABC transporter substrate-binding protein          | Serratia sp.        |
| WP_004947785.1 | M48 family metallopeptidase                                | Serratia sp.        |

| Protein code   | Protein identification                                            | Reference organism  |
|----------------|-------------------------------------------------------------------|---------------------|
| WP_004947911.1 | Hypoxanthine phosphoribosyltransferase                            | Serratia sp.        |
| WP_004947931.1 | Bifunctional aconitate hydratase 2/2-methylisocitrate dehydratase | Serratia sp.        |
| WP_004947949.1 | Pyruvate dehydrogenase complex transcriptional repressor PdhR     | Serratia sp.        |
| WP_004948431.1 | DUF883 domain-containing protein                                  | Serratia sp.        |
| WP_004948486.1 | Stringent starvation protein A                                    | Serratia sp.        |
| WP_004948488.1 | 30S ribosomal protein S9                                          | Serratia sp.        |
| WP_004948491.1 | 50S ribosomal protein L13                                         | Serratia sp.        |
| WP_004948506.1 | UDP-N-acetylglucosamine 1-carboxyvinyltransferase                 | Serratia sp.        |
| WP_004948518.1 | Phospholipid-binding protein MlaC                                 | Serratia sp.        |
| WP_004949058.1 | D-sedoheptulose 7-phosphate isomerase                             | Serratia sp.        |
| WP_004949189.1 | Pyrimidine/purine nucleoside phosphorylase                        | Serratia sp.        |
| WP_004949238.1 | Peroxiredoxin C                                                   | Serratia sp.        |
| WP_004949246.1 | Preprotein translocase subunit YajC                               | Serratia sp.        |
| WP_004949262.1 | 6,7-dimethyl-8-ribityllumazine synthase                           | Serratia sp.        |
| WP_004949342.1 | Hypothetical protein                                              | Serratia sp.        |
| WP_004949394.1 | Bifunctional UDP-sugar hydrolase/5'-nucleotidase                  | Serratia sp.        |
| WP_004949579.1 | DUF493 family protein                                             | Serratia sp.        |
| WP_004949631.1 | CNNM family magnesium/cobalt transport protein CorC               | Serratia sp.        |
| WP_004949671.1 | Glutamine-tRNA ligase                                             | Serratia sp.        |
| WP_004949690.1 | Flavodoxin FldA                                                   | Serratia sp.        |
| WP_004949756.1 | ADP-forming succinate-CoA ligase subunit beta                     | Serratia sp.        |
| WP_004949773.1 | Tol-Pal system protein TolB                                       | Serratia sp.        |
| WP_004949927.1 | Purine-nucleoside phosphorylase                                   | Serratia sp.        |
| WP_004949970.1 | OmpA family protein                                               | Serratia sp.        |
| WP_004949986.1 | Protein CreA                                                      | Serratia plymuthica |
| WP_004949989.1 | Two-component system response regulator ArcA                      | Serratia sp.        |
| WP_004950026.1 | Molecular chaperone DnaK                                          | Serratia sp.        |
| WP_004950148.1 | Cell division protein FtsA                                        | Serratia sp.        |
| WP_004950216.1 | CTP synthase (glutamine hydrolyzing)                              | Serratia sp.        |
| WP_004950328.1 | Carbon storage regulator CsrA                                     | Serratia sp.        |
| WP_004950372.1 | 50S ribosomal protein L19                                         | Serratia sp.        |
| WP_004950476.1 | F0F1 ATP synthase subunit B                                       | Serratia sp.        |
| WP_004950485.1 | F0F1 ATP synthase subunit gamma                                   | Serratia sp.        |
| WP_004950512.1 | ABC transporter substrate-binding protein                         | Serratia sp.        |
| WP_004950559.1 | DNA topoisomerase (ATP-hydrolyzing) subunit B                     | Serratia sp.        |
| WP_004950614.1 | OmpA family lipoprotein                                           | Serratia sp.        |
| WP_004950637.1 | DUF3053 domain-containing protein                                 | Serratia sp.        |
| WP_004950859.1 | Insulinase family protein                                         | Serratia sp.        |
| WP_004950949.1 | DUF1795 domain-containing protein                                 | Serratia sp.        |
| WP_004951125.1 | 30S ribosomal protein S4                                          | Serratia sp.        |
| WP_004951128.1 | 30S ribosomal protein S11                                         | Serratia sp.        |
| WP_004951130.1 | 30S ribosomal protein S13                                         | Serratia sp.        |
| WP_004951135.1 | 50S ribosomal protein L15                                         | Serratia sp.        |
| WP_004951140.1 | 30S ribosomal protein S5                                          | Serratia sp.        |
| WP_004951145.1 | 50S ribosomal protein L6                                          | Serratia sp.        |
| WP_004951149.1 | 30S ribosomal protein S8                                          | Serratia sp.        |
| WP_004951154.1 | 30S ribosomal protein S14                                         | Serratia sp.        |
| WP_004951155.1 | 50S ribosomal protein L5                                          | Serratia sp.        |
| WP_004951158.1 | 50S ribosomal protein L24                                         | Serratia sp.        |
| WP_004951161.1 | 50S ribosomal protein L14                                         | Serratia sp.        |
| WP_004951166.1 | 30S ribosomal protein S17                                         | Serratia sp.        |
| WP_004951169.1 | 50S ribosomal protein L29                                         | Serratia sp.        |
| WP_004951171.1 | 50S ribosomal protein L16                                         | Serratia sp.        |
| WP_004951174.1 | 50S ribosomal protein L22                                         | Serratia sp.        |
| WP_004951177.1 | 50S ribosomal protein L2                                          | Serratia sp.        |
| WP_004951179.1 | 50S ribosomal protein L23                                         | Serratia sp.        |
| WP_004951181.1 | 50S ribosomal protein L3                                          | Serratia sp.        |
| WP_004951196.1 | Elongation factor G                                               | Serratia sp.        |
| WP_004951199.1 | 30S ribosomal protein S7                                          | Serratia sp.        |
| WP_004951488.1 | Fimbrial protein                                                  | Serratia plymuthica |
| WP_004952064.1 | Outer membrane protein assembly factor BamB                       | Serratia sp.        |
| WP_004952077.1 | Nucleoside-diphosphate kinase [yersiniaceae]                      | Yersiniaceae        |



| Protein code   | Protein identification                                                         | Reference organism  |
|----------------|--------------------------------------------------------------------------------|---------------------|
| WP_004952090.1 | Fe-S cluster assembly scaffold IscU                                            | Yersiniaceae        |
| WP_004952096.1 | Fe-S cluster assembly transcriptional regulator IscR                           | Serratia sp.        |
| WP_004952206.1 | Acetyl-CoA carboxylase carboxyl transferase subunit alpha                      | Serratia plymuthica |
| WP_004952213.1 | Molecular chaperone Skp                                                        | Serratia sp.        |
| WP_004952223.1 | UMP kinase                                                                     | Serratia sp.        |
| WP_004952224.1 | Elongation factor Ts                                                           | Serratia sp.        |
| WP_004952226.1 | 30S ribosomal protein S2                                                       | Serratia sp.        |
| WP_004952287.1 | YgdI/YgdR family lipoprotein                                                   | Serratia sp.        |
| WP_004952361.1 | Peptidoglycan DD-metalloendopeptidase family protein                           | Serratia sp.        |
| WP_004952400.1 | Lysine-tRNA ligase                                                             | Serratia sp.        |
| WP_004952410.1 | Bifunctional protein-disulfide isomerase/oxidoreductase DsbC                   | Serratia sp.        |
| WP_004952521.1 | Oxidative stress defense protein                                               | Serratia sp.        |
| WP_004952575.1 | Class II fructose-bisphosphate aldolase                                        | Serratia sp.        |
| WP_004952634.1 | Co-chaperone GroES                                                             | Enterobacterales    |
| WP_004952713.1 | Protease modulator HflC                                                        | Serratia sp.        |
| WP_004952751.1 | 50S ribosomal protein L9                                                       | Serratia sp.        |
| WP_004952787.1 | Inorganic diphosphatase                                                        | Serratia sp.        |
| WP_004952791.1 | Class 1 fructose-bisphosphatase                                                | Serratia sp.        |
| WP_004952830.1 | Serine-type D-Ala-D-Ala carboxypeptidase                                       | Serratia sp.        |
| WP_004952832.1 | Transcription elongation factor GreA                                           | Serratia sp.        |
| WP_004952855.1 | Transcription termination/antitermination protein NusA                         | Serratia sp.        |
| WP_004953176.1 | 50S ribosomal protein L31                                                      | Serratia sp.        |
| WP_004953193.1 | Septal ring assembly protein ZapB                                              | Serratia sp.        |
| WP_004953227.1 | 6-phosphofructokinase                                                          | Serratia sp.        |
| WP_004953231.1 | Periplasmic heavy metal sensor                                                 | Serratia sp.        |
| WP_004953234.1 | Envelope stress response regulator transcription factor CpxR                   | Serratia sp.        |
| WP_004953342.1 | 50S ribosomal protein L28                                                      | Yersiniaceae        |
| WP_004953385.1 | DNA-directed RNA polymerase subunit omega                                      | Serratia sp.        |
| WP_004953623.1 | Autonomous glycyl radical cofactor GrcA                                        | Serratia sp.        |
| WP_004953928.1 | Transcription termination/antitermination protein NusG                         | Serratia sp.        |
| WP_004953932.1 | 50S ribosomal protein L1                                                       | Serratia sp.        |
| WP_006316755.1 | 3-deoxy-8-phosphooctulonate synthase                                           | Serratia sp.        |
| WP_006316879.1 | Thioredoxin-dependent thiol peroxidase                                         | Serratia sp.        |
| WP_006316936.1 | Aspartate-tRNA ligase                                                          | Serratia plymuthica |
| WP_006317091.1 | 30S ribosomal protein S9                                                       | Serratia sp.        |
| WP_006317092.1 | 50S ribosomal protein L13                                                      | Serratia sp.        |
| WP_006317094.1 | DUF1043 family protein                                                         | Serratia sp.        |
| WP_006317106.1 | LPS export abc transporter ATP-binding protein                                 | Serratia sp.        |
| WP_006317219.1 | Matrixin family metalloprotease                                                | Serratia plymuthica |
| WP_006317459.1 | 30S ribosomal protein S6                                                       | Serratia sp.        |
| WP_006317468.1 | Peptidyl-prolyl cis-trans isomerase                                            | Serratia sp.        |
| WP_006317617.1 | Cell division protein FtsZ                                                     | Serratia sp.        |
| WP_006317741.1 | Triose-phosphate isomerase                                                     | Serratia sp.        |
| WP_006317766.1 | Argininosuccinate synthase                                                     | Serratia plymuthica |
| WP_006318001.1 | NADH-quinone oxidoreductase subunit C/D                                        | Serratia plymuthica |
| WP_006318476.1 | Autonomous glycyl radical cofactor GrcA                                        | Serratia sp.        |
| WP_006318638.1 | MetQ/NlpA family lipoprotein                                                   | Serratia sp.        |
| WP_006319070.1 | Ribulose-phosphate 3-epimerase                                                 | Serratia sp.        |
| WP_006319342.1 | Hypothetical protein                                                           | Serratia plymuthica |
| WP_006319550.1 | Thiol peroxidase                                                               | Serratia sp.        |
| WP_006319787.1 | ATP-dependent Clp endopeptidase proteolytic subunit ClpP                       | Serratia sp.        |
| WP_006319788.1 | ATP-dependent protease ATP-binding subunit ClpX                                | Serratia sp.        |
| WP_006320726.1 | Bifunctional 3-hydroxydecanoyl-ACP dehydratase/trans-2-decenoyl-ACP- isomerase | Serratia sp.        |
| WP_006320904.1 | Serine protease inhibitor ecotin                                               | Serratia plymuthica |
| WP_006321188.1 | DNA-binding transcriptional regulator H-NS                                     | Serratia sp.        |
| WP_006321294.1 | Xanthine phosphoribosyltransferase                                             | Serratia sp.        |
| WP_006321446.1 | Flagellar basal body rod protein flgC                                          | Serratia sp.        |
| WP_006321571.1 | ATP-binding cassette domain-containing protein                                 | Serratia plymuthica |
| WP_006321728.1 | Glycine-tRNA ligase subunit alpha                                              | Serratia sp.        |
| WP_006321789.1 | Phosphate ABC transporter substrate-binding protein PstS                       | Serratia sp.        |
| WP_006321796.1 | F0F1 ATP synthase subunit gamma                                                | Serratia sp.        |
| WP_006321797.1 | F0F1 ATP synthase subunit alpha                                                | Serratia sp.        |

| Protein code   | Protein identification                                                                                   | Reference organism  |
|----------------|----------------------------------------------------------------------------------------------------------|---------------------|
| WP_006321798.1 | F0F1 atp synthase subunit delta                                                                          | Serratia sp.        |
| WP_006322046.1 | Elongation factor P                                                                                      | Serratia sp.        |
| WP_006322050.1 | DUF4156 domain-containing protein                                                                        | Serratia sp.        |
| WP_006322224.1 | Hypothetical protein                                                                                     | Serratia plymuthica |
| WP_006322514.1 | 23S rRNA accumulation protein YceD                                                                       | Serratia sp.        |
| WP_006322834.1 | Hypothetical protein, partial                                                                            | Serratia sp.        |
| WP_006322974.1 | ABC transporter substrate-binding protein                                                                | Serratia plymuthica |
| WP_006323135.1 | 50S ribosomal protein L11                                                                                | Serratia sp.        |
| WP_006323136.1 | 50S ribosomal protein L10                                                                                | Serratia sp.        |
| WP_006323137.1 | 50S ribosomal protein L7/L12                                                                             | Serratia sp.        |
| WP_006323187.1 | Entericidin A/B family lipoprotein                                                                       | Serratia sp.        |
| WP_006323248.1 | Bifunctional 2',3'-cyclic-nucleotide 2'-phosphodiesterase/3'-nucleotidase                                | Serratia plymuthica |
| WP_006323429.1 | L,D-transpeptidase family protein                                                                        | Serratia sp.        |
| WP_006323548.1 | Isoleucine--tRNA ligase                                                                                  | Serratia sp.        |
| WP_006323695.1 | Phage major tail tube protein                                                                            | Serratia sp.        |
| WP_006323696.1 | Phage tail sheath protein                                                                                | Serratia plymuthica |
| WP_006323718.1 | Outer membrane protein assembly factor BamD                                                              | Serratia sp.        |
| WP_006323817.1 | ABC transporter substrate-binding protein                                                                | Serratia sp.        |
| WP_006323877.1 | DUF1471 domain-containing protein                                                                        | Serratia sp.        |
| WP_006323924.1 | 6,7-dimethyl-8-ribityllumazine synthase                                                                  | Serratia sp.        |
| WP_006323936.1 | DNA-binding protein HU-beta                                                                              | Serratia sp.        |
| WP_006324117.1 | Tol-Pal system protein TolQ                                                                              | Serratia sp.        |
| WP_006324221.1 | D-alanine--D-alanine ligase                                                                              | Serratia sp.        |
| WP_006324338.1 | DNA starvation/stationary phase protection protein Dps                                                   | Serratia sp.        |
| WP_006324437.1 | NADP-dependent phosphogluconate dehydrogenase                                                            | Serratia plymuthica |
| WP_006324520.1 | Arginine ABC transporter substrate-binding protein                                                       | Serratia plymuthica |
| WP_006324547.1 | Formate C-acetyltransferase                                                                              | Serratia sp.        |
| WP_006324584.1 | Porin OmpA                                                                                               | Serratia plymuthica |
| WP_006324721.1 | Penicillin-binding protein activator LpoB                                                                | Serratia sp.        |
| WP_006325002.1 | DUF945 domain-containing protein                                                                         | Serratia sp.        |
| WP_006325067.1 | Peptidyl-dipeptidase Dcp                                                                                 | Serratia plymuthica |
| WP_006325615.1 | Hypothetical protein                                                                                     | Serratia sp.        |
| WP_006325706.1 | GTP cyclohydrolase II                                                                                    | Serratia plymuthica |
| WP_006325792.1 | Bifunctional acetaldehyde-CoA/alcohol dehydrogenase                                                      | Serratia plymuthica |
| WP_006325948.1 | Peptidoglycan-binding protein LysM                                                                       | Serratia sp.        |
| WP_006326731.1 | Deoxyribonuclease IV                                                                                     | Serratia plymuthica |
| WP_006326771.1 | Porin OmpC                                                                                               | Serratia plymuthica |
| WP_006326780.1 | Ribonucleoside-diphosphate reductase subunit alpha                                                       | Serratia sp.        |
| WP_006326854.1 | NADH-quinone oxidoreductase subunit NuoG                                                                 | Serratia sp.        |
| WP_006327417.1 | N-acetyltransferase                                                                                      | Serratia plymuthica |
| WP_006327784.1 | Phosphoglycerate kinase                                                                                  | Serratia sp.        |
| WP_006327880.1 | Hypothetical protein                                                                                     | Serratia sp.        |
| WP_006327884.1 | Pyruvate dehydrogenase complex dihydrolipoyllysine-residue acetyltransferase                             | Serratia plymuthica |
| WP_006327890.1 | Pyruvate dehydrogenase (acetyl-transferring), homodimeric type                                           | Serratia plymuthica |
| WP_006327903.1 | Pyrroline-5-carboxylate reductase                                                                        | Serratia plymuthica |
| WP_006328168.1 | Outer membrane channel protein TolC                                                                      | Serratia plymuthica |
| WP_006328270.1 | Lipopolysaccharide ABC transporter substrate-binding protein LptA                                        | Serratia sp.        |
| WP_006328507.1 | Peptidylprolyl isomerase a                                                                               | Serratia sp.        |
| WP_006328854.1 | Sulfate ABC transporter substrate-binding protein                                                        | Serratia plymuthica |
| WP_006328929.1 | YicC family protein                                                                                      | Serratia sp.        |
| WP_006329006.1 | Aspartate--ammonia ligase                                                                                | Serratia sp.        |
| WP_012004757.1 | DNA-binding protein HU-alpha                                                                             | Serratia sp.        |
| WP_012006065.1 | Deoxyribose-phosphate aldolase                                                                           | Serratia sp.        |
| WP_013810959.1 | HAMP domain-containing protein                                                                           | Serratia sp.        |
| WP_013811104.1 | Bifunctional demethylmenaquinone methyltransferase/2-methoxy-6-polyprenyl-1,4-benzoquinol methylase UbiE | Serratia sp.        |
| WP_013811124.1 | Elongation factor Tu                                                                                     | Serratia sp.        |
| WP_013811127.1 | DNA-directed RNA polymerase subunit beta'                                                                | Serratia sp.        |
| WP_013811241.1 | Protease modulator HflC                                                                                  | Serratia sp.        |
| WP_013811258.1 | YtfJ family protein                                                                                      | Serratia sp.        |
| WP_013811266.1 | Malate dehydrogenase                                                                                     | Serratia sp.        |
| WP_013811278.1 | Polyribonucleotide nucleotidyltransferase                                                                | Serratia sp.        |

| Protein code   | Protein identification                                                                                                              | Reference organism  |
|----------------|-------------------------------------------------------------------------------------------------------------------------------------|---------------------|
| WP_013811321.1 | 2-iminobutanoate/2-iminopropanoate deaminase                                                                                        | Serratia sp.        |
| WP_013811442.1 | Transaldolase                                                                                                                       | Serratia sp.        |
| WP_013811470.1 | Peptidylprolyl isomerase SurA                                                                                                       | Serratia sp.        |
| WP_013811512.1 | Glutamate-1-semialdehyde 2,1-aminomutase                                                                                            | Serratia sp.        |
| WP_013811522.1 | Phosphopyruvate hydratase                                                                                                           | Serratia sp.        |
| WP_013811550.1 | S-ribosylhomocysteine lyase                                                                                                         | Serratia sp.        |
| WP_013811555.1 | Phage tail tape measure protein                                                                                                     | Serratia sp.        |
| WP_013811573.1 | Ribosome-associated translation inhibitor RaiA                                                                                      | Serratia sp.        |
| WP_013811790.1 | Adenylate kinase                                                                                                                    | Serratia sp.        |
| WP_013811875.1 | LPS assembly lipoprotein LptE                                                                                                       | Serratia sp.        |
| WP_013811881.1 | Amino acid ABC transporter substrate-binding protein                                                                                | Serratia sp.        |
| WP_013811900.1 | Ferric iron uptake transcriptional regulator                                                                                        | Serratia sp.        |
| WP_013811925.1 | Cytochrome ubiquinol oxidase subunit I                                                                                              | Serratia sp.        |
| WP_013811938.1 | 2,3-diphosphoglycerate-dependent phosphoglycerate mutase                                                                            | Serratia sp.        |
| WP_013812016.1 | ABC transporter substrate-binding protein                                                                                           | Serratia sp.        |
| WP_013812121.1 | DNA starvation/stationary phase protection protein Dps                                                                              | Serratia sp.        |
| WP_013812141.1 | Fimbria/pilus periplasmic chaperone                                                                                                 | Serratia sp.        |
| WP_013812178.1 | Galactose/glucose ABC transporter substrate-binding protein MglB                                                                    | Serratia sp.        |
| WP_013812257.1 | Arginine ABC transporter substrate-binding protein                                                                                  | Serratia sp.        |
| WP_013812293.1 | 3-phosphoserine/phosphohydroxythreonine transaminase                                                                                | Serratia sp.        |
| WP_013812310.1 | Aspartate/tyrosine/aromatic aminotransferase                                                                                        | Serratia sp.        |
| WP_013812357.1 | DNA/RNA non-specific endonuclease                                                                                                   | Serratia sp.        |
| WP_013812467.1 | DUF2511 domain-containing protein                                                                                                   | Serratia sp.        |
| WP_013812491.1 | Hypothetical protein                                                                                                                | Serratia sp.        |
| WP_013812632.1 | Threonine-tRNA ligase                                                                                                               | Serratia sp.        |
| WP_013812633.1 | Translation initiation factor IF-3                                                                                                  | Serratia sp.        |
| WP_013812961.1 | Glu/Leu/Phe/Val dehydrogenase                                                                                                       | Serratia sp.        |
| WP_013813138.1 | YciK family oxidoreductase                                                                                                          | Serratia sp.        |
| WP_013813311.1 | Septum site-determining protein MinD                                                                                                | Serratia sp.        |
| WP_013813492.1 | Flagellar hook protein FlgE                                                                                                         | Serratia sp.        |
| WP_013813653.1 | Atp-grasp domain-containing protein                                                                                                 | Serratia sp.        |
| WP_013813723.1 | DUF1440 domain-containing protein                                                                                                   | Serratia sp.        |
| WP_013813877.1 | Stress response protein ElaB                                                                                                        | Serratia sp.        |
| WP_013813948.1 | Phospholipid-binding lipoprotein MlaA                                                                                               | Serratia sp.        |
| WP_013814033.1 | Nitrate reductase catalytic subunit NapA                                                                                            | Serratia sp.        |
| WP_013814057.1 | Outer membrane protein assembly factor BamC                                                                                         | Serratia sp.        |
| WP_013814058.1 | 4-hydroxy-tetrahydrodipicolinate synthase                                                                                           | Serratia sp.        |
| WP_013814237.1 | Glycine betaine/L-proline ABC transporter substrate-binding protein prox                                                            | Serratia sp.        |
| WP_013814266.1 | Outer membrane protein assembly factor BamA                                                                                         | Serratia sp.        |
| WP_013814397.1 | Glycine cleavage system aminomethyltransferase GcvT                                                                                 | Serratia sp.        |
| WP_013814611.1 | Cell division protein FtsP                                                                                                          | Serratia sp.        |
| WP_013814716.1 | Acetyl-CoA carboxylase biotin carboxylase subunit                                                                                   | Serratia sp.        |
| WP_013814788.1 | Large-conductance mechanosensitive channel protein MscL                                                                             | Serratia sp.        |
| WP_013814793.1 | 50S ribosomal protein L30                                                                                                           | Serratia sp.        |
| WP_013814794.1 | Bacterioferritin                                                                                                                    | Serratia sp.        |
| WP_013814922.1 | Oligopeptidase A                                                                                                                    | Serratia sp.        |
| WP_013814996.1 | HslU-HslV peptidase ATPase subunit                                                                                                  | Serratia sp.        |
| WP_013815010.1 | 2,3-bisphosphoglycerate-independent phosphoglycerate mutase                                                                         | Serratia sp.        |
| WP_013815013.1 | Glycine C-acetyltransferase                                                                                                         | Serratia sp.        |
| WP_013815047.1 | Glutamate-ammonia ligase                                                                                                            | Serratia sp.        |
| WP_020438512.1 | Beta-Ala-His dipeptidase                                                                                                            | Serratia plymuthica |
| WP_020438630.1 | Asparagine synthase B                                                                                                               | Serratia plymuthica |
| WP_020438738.1 | Type 1 fimbrial protein                                                                                                             | Serratia sp.        |
| WP_020439242.1 | FlhC/FlhB family flagellin                                                                                                          | Serratia sp.        |
| WP_020439536.1 | Sulfate ABC transporter substrate-binding protein                                                                                   | Serratia plymuthica |
| WP_020439542.1 | Transketolase                                                                                                                       | Serratia plymuthica |
| WP_020439668.1 | Glycine betaine/L-proline ABC transporter ATP-binding protein ProV                                                                  | Serratia plymuthica |
| WP_020439672.1 | Rcs stress response system protein RcsF                                                                                             | Serratia sp.        |
| WP_020439674.1 | Envelope stress response activation lipoprotein NlpE                                                                                | Serratia sp.        |
| WP_020439835.1 | Bifunctional D-glycero-beta-D-manno-heptose-7-phosphate kinase/D-glycero-beta-D-manno-heptose 1-phosphate adenyllyltransferase HldE | Serratia sp.        |
| WP_020439912.1 | 50S ribosomal protein L30                                                                                                           | Serratia sp.        |

| Protein code   | Protein identification                                                                           | Reference organism  |
|----------------|--------------------------------------------------------------------------------------------------|---------------------|
| WP_020439923.1 | Tryptophan--tRNA ligase                                                                          | Serratia plymuthica |
| WP_020453915.1 | Uracil phosphoribosyltransferase                                                                 | Serratia plymuthica |
| WP_020825678.1 | Succinate--CoA ligase subunit alpha                                                              | Serratia sp.        |
| WP_020837234.1 | 50S ribosomal protein L18                                                                        | Serratia sp.        |
| WP_020837240.1 | 50S ribosomal protein L14                                                                        | Serratia sp.        |
| WP_024484477.1 | Phosphocarrier protein Hpr                                                                       | Serratia sp.        |
| WP_024912205.1 | 50s ribosomal protein l2                                                                         | Yersiniaceae        |
| WP_032693575.1 | ABC transporter permease                                                                         | Enterobacterales    |
| WP_037425599.1 | 6-phosphofructokinase                                                                            | Serratia sp.        |
| WP_037429949.1 | Hypothetical protein                                                                             | Serratia plymuthica |
| WP_037430486.1 | Type 1 fimbrial protein                                                                          | Serratia plymuthica |
| WP_037431412.1 | Phosphate acetyltransferase                                                                      | Serratia plymuthica |
| WP_037431691.1 | Biosynthetic arginine decarboxylase                                                              | Serratia plymuthica |
| WP_037432055.1 | Uroporphyrinogen-III C-methyltransferase                                                         | Serratia plymuthica |
| WP_037432192.1 | Phage major tail tube protein                                                                    | Serratia plymuthica |
| WP_037432304.1 | Helix-turn-helix domain-containing protein                                                       | Serratia plymuthica |
| WP_037432390.1 | Molybdate ABC transporter substrate-binding protein                                              | Serratia plymuthica |
| WP_037432618.1 | Asparagine--tRNA ligase                                                                          | Serratia plymuthica |
| WP_037433008.1 | Outer membrane protein OmpW                                                                      | Serratia plymuthica |
| WP_037433374.1 | GSH-dependent disulfide bond oxidoreductase                                                      | Serratia plymuthica |
| WP_037433529.1 | Inositol-1-monophosphatase                                                                       | Serratia sp.        |
| WP_037433563.1 | NADP(H)-dependent aldo-keto reductase                                                            | Serratia plymuthica |
| WP_037433725.1 | Glucose-6-phosphate isomerase                                                                    | Serratia sp.        |
| WP_041415851.1 | ATP-dependent zinc metalloprotease FtsH                                                          | Serratia sp.        |
| WP_041416326.1 | Ribosome recycling factor                                                                        | Serratia sp.        |
| WP_041416570.1 | Bifunctional UDP-4-amino-4-deoxy-l-arabinose formyltransferase/UDP-glucuronic acid oxidase AnA   | Serratia sp.        |
| WP_041416879.1 | Ribonuclease E                                                                                   | Serratia plymuthica |
| WP_041417326.1 | Methionine ABC transporter substrate-binding protein                                             | Serratia plymuthica |
| WP_041417366.1 | Hypothetical protein                                                                             | Serratia plymuthica |
| WP_041417724.1 | Hypothetical protein                                                                             | Serratia sp.        |
| WP_043912776.1 | dUTP diphosphatase                                                                               | Serratia sp.        |
| WP_043912966.1 | Ferrichrome porin FhuA                                                                           | Serratia plymuthica |
| WP_043912969.1 | Bifunctional indole-3-glycerol-phosphate synthase TrpC/phosphoribosylanthranilate isomerase TrpF | Serratia plymuthica |
| WP_043913104.1 | Diaminobutyrate--2-oxoglutarate transaminase                                                     | Serratia sp.        |
| WP_043913327.1 | Ycel family protein                                                                              | Serratia plymuthica |
| WP_044554947.1 | 50S ribosomal protein L22                                                                        | Serratia sp.        |
| WP_052028166.1 | Peptide ABC transporter substrate-binding protein                                                | Serratia plymuthica |
| WP_062790903.1 | ABC transporter substrate-binding protein                                                        | Serratia sp.        |
| WP_062791335.1 | Murein hydrolase activator NlpD                                                                  | Serratia plymuthica |
| WP_062791847.1 | UDP-glucose/gGDP-mannose dehydrogenase family protein                                            | Serratia sp.        |
| WP_062791875.1 | Elongation factor Tu, partial                                                                    | Serratia sp.        |
| WP_062792110.1 | Acetate kinase                                                                                   | Serratia sp.        |
| WP_062792216.1 | NAD(P)H-dependent oxidoreductase                                                                 | Serratia sp.        |
| WP_062792956.1 | Spermidine/putrescine ABC transporter substrate-binding protein PotF                             | Serratia sp.        |
| WP_062793098.1 | Peptidylprolyl isomerase B                                                                       | Serratia sp.        |
| WP_062868083.1 | Porin                                                                                            | Serratia plymuthica |
| WP_062868132.1 | Beta-ketoacyl-ACP synthase I                                                                     | Serratia sp.        |
| WP_062868304.1 | Phosphoribosylformylglycinamide synthase                                                         | Serratia plymuthica |
| WP_062868384.1 | Thymidylate synthase                                                                             | Serratia plymuthica |
| WP_062868532.1 | Phosphoglycerate dehydrogenase                                                                   | Serratia plymuthica |
| WP_062868575.1 | Agmatinase                                                                                       | Serratia plymuthica |
| WP_062868807.1 | DUF883 domain-containing protein                                                                 | Serratia plymuthica |
| WP_062868870.1 | Transporter substrate-binding domain-containing protein                                          | Serratia plymuthica |
| WP_062868872.1 | Quinone oxidoreductase                                                                           | Serratia plymuthica |
| WP_062868886.1 | Lysine-sensitive aspartokinase 3                                                                 | Serratia plymuthica |
| WP_062868899.1 | L-threonylcarbamoyladenylate synthase type 1 TsaC                                                | Serratia plymuthica |
| WP_062868906.1 | DNA+BT4-directed RNA polymerase subunit alpha                                                    | Enterobacterales    |
| WP_062868943.1 | Glycerol-3-phosphate dehydrogenase                                                               | Serratia plymuthica |
| WP_062869022.1 | Atp-independent periplasmic protein-refolding chaperone                                          | Serratia plymuthica |
| WP_062869058.1 | Murein hydrolase activator EnvC                                                                  | Serratia plymuthica |



| Protein code   | Protein identification                                                  | Reference organism  |
|----------------|-------------------------------------------------------------------------|---------------------|
| WP_062869060.1 | ADP-glyceromanno-heptose 6-epimerase                                    | Serratia plymuthica |
| WP_062869220.1 | Glycerophosphodiester phosphodiesterase                                 | Serratia plymuthica |
| WP_062869242.1 | 5-methyltetrahydropteroyltriglutamate--homocysteine S-methyltransferase | Serratia plymuthica |
| WP_062869375.1 | Alpha, alpha-phosphotrehalase                                           | Serratia plymuthica |
| WP_062869593.1 | Molecular chaperone DnaJ                                                | Serratia plymuthica |
| WP_062869629.1 | Cell division protein FtsZ                                              | Serratia plymuthica |
| WP_062869659.1 | Assimilatory sulfite reductase (NADPH) hemoprotein subunit              | Serratia plymuthica |
| WP_062869793.1 | DUF2501 domain-containing protein                                       | Serratia plymuthica |
| WP_062869846.1 | Trigger factor                                                          | Serratia plymuthica |
| WP_062869945.1 | Citrate synthase                                                        | Serratia plymuthica |
| WP_062869947.1 | Bifunctional metallophosphatase/5'-nucleotidase                         | Serratia plymuthica |
| WP_062869988.1 | Hypothetical protein                                                    | Serratia plymuthica |
| WP_062870112.1 | ABC transporter substrate-binding protein                               | Serratia plymuthica |
| WP_062870323.1 | NADP-dependent phosphogluconate dehydrogenase                           | Serratia plymuthica |
| WP_062870397.1 | Porin OmpC                                                              | Serratia plymuthica |
| WP_062870486.1 | Metal-dependent hydrolase                                               | Serratia plymuthica |
| WP_062870514.1 | Hypothetical protein                                                    | Serratia plymuthica |
| WP_062870578.1 | Hypothetical protein                                                    | Serratia plymuthica |
| WP_062870646.1 | Pyruvate kinase PykF                                                    | Serratia plymuthica |
| WP_062870706.1 | Class C beta-lactamase                                                  | Serratia plymuthica |
| WP_062870776.1 | LLM class flavin-dependent oxidoreductase                               | Serratia plymuthica |
| WP_062871046.1 | MipA/OmpV family protein                                                | Serratia plymuthica |
| WP_063177426.1 | Acetolactate synthase AlsS                                              | Serratia plymuthica |
| WP_063177448.1 | Aconitate hydratase AcnA                                                | Serratia plymuthica |
| WP_063196854.1 | Osmotically-inducible lipoprotein OsmE                                  | Serratia plymuthica |
| WP_063196881.1 | PTS fructose transporter subunit IIBC                                   | Serratia plymuthica |
| WP_063197154.1 | Hypothetical protein                                                    | Serratia plymuthica |
| WP_063197869.1 | Phosphatase                                                             | Serratia plymuthica |
| WP_063197910.1 | LPS assembly lipoprotein LptE                                           | Serratia plymuthica |
| WP_063198069.1 | Endopeptidase La                                                        | Serratia plymuthica |
| WP_063198203.1 | Hypothetical protein                                                    | Serratia plymuthica |
| WP_063198541.1 | Class II fumarate hydratase                                             | Serratia plymuthica |
| WP_063198636.1 | Energy-dependent translational throttle protein EttA                    | Serratia plymuthica |
| WP_063198645.1 | Murein transglycosylase                                                 | Serratia plymuthica |
| WP_063198674.1 | Co2+/Mg2+ efflux protein ApaG                                           | Serratia plymuthica |
| WP_063198800.1 | Baseplate assembly protein                                              | Serratia plymuthica |
| WP_063198805.1 | Phage baseplate assembly protein V                                      | Serratia plymuthica |
| WP_063198834.1 | FOF1 ATP synthase subunit beta                                          | Serratia plymuthica |
| WP_063198840.1 | Glutamine--fructose-6-phosphate transaminase (isomerizing)              | Serratia plymuthica |
| WP_063199187.1 | Dihydroorotase                                                          | Serratia plymuthica |
| WP_063199821.1 | Serine protease inhibitor ecotin                                        | Serratia plymuthica |
| WP_063199886.1 | UDP-glucose 4-epimerase Gale                                            | Serratia plymuthica |
| WP_063200017.1 | Fimbrial biogenesis outer membrane usher protein                        | Serratia plymuthica |
| WP_063200032.1 | Betaine-aldehyde dehydrogenase                                          | Serratia plymuthica |
| WP_063200275.1 | Pitrilysin                                                              | Serratia plymuthica |
| WP_063200407.1 | PfaD family polyunsaturated fatty acid/polyketide biosynthesis protein  | Serratia plymuthica |
| WP_063200412.1 | Amidohydrolase                                                          | Serratia plymuthica |
| WP_063200622.1 | Phosphoenolpyruvate carboxykinase (ATP)                                 | Serratia plymuthica |
| WP_063200869.1 | Glycerol dehydrogenase                                                  | Serratia plymuthica |
| WP_063201108.1 | Oligopeptide ABC transporter substrate-binding protein OppA             | Serratia plymuthica |
| WP_063201285.1 | Endonuclease                                                            | Serratia plymuthica |
| WP_063201305.1 | Long-chain fatty acid transporter FadL                                  | Serratia plymuthica |
| WP_063201373.1 | Glutamate--tRNA ligase                                                  | Serratia plymuthica |
| WP_063201803.1 | Hypothetical protein                                                    | Serratia plymuthica |
| WP_063201917.1 | Cystine ABC transporter substrate-binding protein                       | Serratia plymuthica |
| WP_063201935.1 | Iron uptake system protein EfeO                                         | Serratia plymuthica |
| WP_063202579.1 | DUF1795 domain-containing protein                                       | Serratia plymuthica |
| WP_063202720.1 | Peptidoglycan-binding protein LysM                                      | Serratia plymuthica |
| WP_063202862.1 | L-asparaginase 2, partial                                               | Serratia plymuthica |
| WP_063203027.1 | DUF1481 domain-containing protein                                       | Serratia plymuthica |
| WP_063203045.1 | DNA-directed RNA polymerase subunit beta'                               | Serratia plymuthica |
| WP_063203173.1 | FKBP-type peptidyl-prolyl cis-trans isomerase                           | Serratia plymuthica |



| Protein code   | Protein identification                                                               | Reference organism  |
|----------------|--------------------------------------------------------------------------------------|---------------------|
| WP_064798650.1 | Two-component system response regulator ArcA                                         | Serratia sp.        |
| WP_064798662.1 | Alanine--tRNA ligase                                                                 | Serratia plymuthica |
| WP_064798698.1 | 3',5'-cyclic-nucleotide phosphodiesterase                                            | Serratia plymuthica |
| WP_064798746.1 | UTP--glucose-1-phosphate uridylyltransferase GalU                                    | Serratia plymuthica |
| WP_064798747.1 | Polysaccharide export protein                                                        | Serratia plymuthica |
| WP_064798756.1 | Hypothetical protein                                                                 | Serratia plymuthica |
| WP_064798761.1 | Phosphomannomutase CpsG                                                              | Serratia plymuthica |
| WP_064798779.1 | Hypothetical protein                                                                 | Serratia plymuthica |
| WP_064798816.1 | Aldehyde dehydrogenase                                                               | Serratia plymuthica |
| WP_064798855.1 | Hypothetical protein                                                                 | Serratia plymuthica |
| WP_064798864.1 | D-hexose-6-phosphate mutarotase                                                      | Serratia plymuthica |
| WP_064798956.1 | Flagellar basal body rod protein FlgF                                                | Serratia plymuthica |
| WP_064799070.1 | Lytic murein transglycosylase B                                                      | Serratia plymuthica |
| WP_064799075.1 | NADP-dependent oxaloacetate-decarboxylating malate dehydrogenase                     | Serratia plymuthica |
| WP_064799080.1 | Nitrate reductase catalytic subunit NapA                                             | Serratia plymuthica |
| WP_064799183.1 | Non-ribosomal peptide synthetase                                                     | Serratia plymuthica |
| WP_064799229.1 | Glutathione-disulfide reductase                                                      | Serratia plymuthica |
| WP_064799257.1 | Tyrosine-protein kinase Wzc                                                          | Serratia plymuthica |
| WP_064799364.1 | Lipoprotein localization protein LolB                                                | Serratia plymuthica |
| WP_064799697.1 | Bifunctional glycosyl transferase/transpeptidase                                     | Serratia plymuthica |
| WP_065505698.1 | Thioredoxin TrxA                                                                     | Serratia sp.        |
| WP_065505744.1 | DNA-directed RNA polymerase subunit beta                                             | Serratia sp.        |
| WP_065505781.1 | Polyribonucleotide nucleotidyltransferase                                            | Serratia sp.        |
| WP_065505783.1 | DEAD/DEAH family ATP-dependent RNA helicase                                          | Serratia sp.        |
| WP_065505885.1 | Glutamate--cysteine ligase                                                           | Serratia sp.        |
| WP_065505898.1 | Phage tail protein I                                                                 | Serratia plymuthica |
| WP_065505914.1 | 23S rRNA pseudouridine(1911/1915/1917) synthase RluD                                 | Serratia sp.        |
| WP_065505963.1 | Succinate dehydrogenase iron-sulfur subunit                                          | Serratia sp.        |
| WP_065505965.1 | 2-oxoglutarate dehydrogenase complex dihydrolipoyllysine-residue succinyltransferase | Serratia sp.        |
| WP_065505971.1 | Cell division protein CpoB                                                           | Serratia sp.        |
| WP_065506192.1 | Glycine zipper 2TM domain-containing protein                                         | Serratia sp.        |
| WP_065506275.1 | Peptidyl-dipeptidase Dcp                                                             | Serratia plymuthica |
| WP_065506321.1 | Pyruvate kinase                                                                      | Serratia sp.        |
| WP_065506399.1 | Penicillin-insensitive murein endopeptidase                                          | Serratia sp.        |
| WP_065506404.1 | Acetyl-CoA C-acyltransferase FadI                                                    | Serratia sp.        |
| WP_065506483.1 | Serine hydroxymethyltransferase                                                      | Serratia sp.        |
| WP_065506613.1 | Formate dehydrogenase subunit alpha                                                  | Serratia sp.        |
| WP_065506637.1 | Divisome-associated lipoprotein YraP                                                 | Serratia sp.        |
| WP_065506702.1 | Peptide deformylase                                                                  | Serratia sp.        |
| WP_065506761.1 | Molybdopterin-dependent oxidoreductase                                               | Serratia plymuthica |
| WP_071531447.1 | Ribose-phosphate pyrophosphokinase                                                   | Serratia plymuthica |
| WP_071825589.1 | S-type pyocin domain-containing protein                                              | Serratia plymuthica |
| WP_073439042.1 | NADH:flavin oxidoreductase/NADH oxidase                                              | Serratia plymuthica |
| WP_073439169.1 | Carboxylating nicotinate-nucleotide diphosphorylase                                  | Serratia plymuthica |
| WP_073439268.1 | PLP-dependent transferase                                                            | Serratia plymuthica |
| WP_073439293.1 | Flagellar hook assembly protein FlgD                                                 | Serratia plymuthica |
| WP_073439433.1 | Alcohol dehydrogenase AdhP                                                           | Serratia plymuthica |
| WP_073439450.1 | Lipoprotein                                                                          | Serratia plymuthica |
| WP_073439459.1 | ABC transporter substrate-binding protein                                            | Serratia plymuthica |
| WP_073439488.1 | Adenine phosphoribosyltransferase                                                    | Serratia plymuthica |
| WP_073439559.1 | M48 family metallopeptidase                                                          | Serratia plymuthica |
| WP_073439566.1 | Peptidylprolyl isomerase                                                             | Serratia plymuthica |
| WP_073439704.1 | Hypothetical protein                                                                 | Serratia plymuthica |
| WP_073439740.1 | Antibiotic biosynthesis monooxygenase                                                | Serratia plymuthica |
| WP_073439779.1 | DUF1496 domain-containing protein                                                    | Serratia plymuthica |
| WP_073439813.1 | Aldose 1-epimerase family protein                                                    | Serratia plymuthica |
| WP_073439860.1 | Carboxy terminal-processing peptidase                                                | Serratia plymuthica |
| WP_073439872.1 | Patatin-like phospholipase family protein                                            | Serratia plymuthica |
| WP_073440018.1 | Beta-glucosidase BglX                                                                | Serratia plymuthica |
| WP_073440037.1 | Colicin-B                                                                            | Serratia plymuthica |
| WP_073440047.1 | Ribonucleotide-diphosphate reductase subunit beta                                    | Serratia plymuthica |

| Protein code   | Protein identification                                                       | Reference organism  |
|----------------|------------------------------------------------------------------------------|---------------------|
| WP_073440048.1 | Catalase                                                                     | Serratia plymuthica |
| WP_073440058.1 | Metal ABC transporter substrate-binding protein                              | Serratia plymuthica |
| WP_073440102.1 | Nucleotide exchange factor GrpE                                              | Serratia plymuthica |
| WP_073440120.1 | NAD-dependent epimerase/dehydratase family protein                           | Serratia plymuthica |
| WP_073440145.1 | Adenylosuccinate lyase                                                       | Serratia plymuthica |
| WP_073440158.1 | NAD-dependent succinate-semialdehyde dehydrogenase                           | Serratia plymuthica |
| WP_073440218.1 | Thioredoxin domain-containing protein                                        | Serratia plymuthica |
| WP_073440246.1 | NADP-dependent oxaloacetate-decarboxylating malate dehydrogenase             | Serratia plymuthica |
| WP_073440254.1 | NAD-dependent DNA ligase LigA                                                | Serratia plymuthica |
| WP_073440262.1 | Aspartate-semialdehyde dehydrogenase                                         | Serratia plymuthica |
| WP_073440264.1 | P1 family peptidase                                                          | Serratia plymuthica |
| WP_073440272.1 | GrxA family glutaredoxin                                                     | Serratia plymuthica |
| WP_073440294.1 | Glu/Leu/Phe/val dehydrogenase                                                | Serratia plymuthica |
| WP_073440327.1 | Ribosome maturation factor RimpP                                             | Serratia sp.        |
| WP_073440332.1 | Glutathione ABC transporter substrate-binding protein GsiB                   | Serratia plymuthica |
| WP_073440375.1 | Peptidase inhibitor I78 family protein                                       | Serratia plymuthica |
| WP_073440417.1 | ECA polysaccharide chain length modulation protein                           | Serratia plymuthica |
| WP_073440429.1 | Alpha-D-glucose phosphate-specific phosphoglucomutase                        | Serratia plymuthica |
| WP_073440668.1 | Glutamine-hydrolyzing carbamoyl-phosphate synthase small subunit             | Serratia plymuthica |
| WP_073440736.1 | Phosphoadenylyl-sulfate reductase                                            | Serratia plymuthica |
| WP_073440737.1 | NADPH-dependent assimilatory sulfite reductase flavoprotein subunit          | Serratia plymuthica |
| WP_073440786.1 | 1-deoxy-D-xylulose-5-phosphate synthase                                      | Serratia plymuthica |
| WP_073440800.1 | Recombination-associated protein RdgC                                        | Serratia plymuthica |
| WP_073440841.1 | Glutamine-hydrolyzing GMP synthase                                           | Serratia plymuthica |
| WP_073440858.1 | DUF1090 domain-containing protein                                            | Serratia plymuthica |
| WP_073440881.1 | N-acetylmuramoyl-L-alanine amidase                                           | Serratia plymuthica |
| WP_073440890.1 | Fused PTS fructose transporter subunit IIa/HPr protein                       | Serratia plymuthica |
| WP_073440891.1 | Trimethylamine N-oxide reductase catalytic subunit TorA                      | Serratia plymuthica |
| WP_073440955.1 | Pyruvate dehydrogenase complex dihydrolipoyllysine-residue acetyltransferase | Serratia plymuthica |
| WP_073440965.1 | Glutathione synthase                                                         | Serratia plymuthica |
| WP_073441180.1 | Oxidoreductase                                                               | Serratia plymuthica |
| WP_073441184.1 | Carbonic anhydrase                                                           | Serratia plymuthica |
| WP_073441200.1 | Capsule assembly Wzi family protein                                          | Serratia plymuthica |
| WP_073441219.1 | N-acetylmuramoyl-L-alanine amidase                                           | Serratia plymuthica |
| WP_073999785.1 | Multifunctional acyl-CoA thioesterase I/protease I/lysophospholipase L1      | Serratia plymuthica |
| WP_086012862.1 | Molecular chaperone HtpG                                                     | Serratia plymuthica |
| WP_086012891.1 | Aminopeptidase PepB                                                          | Serratia plymuthica |
| WP_086012895.1 | Dihydrolipoyl dehydrogenase                                                  | Serratia sp.        |
| WP_086016609.1 | Glucans biosynthesis protein mdog                                            | Serratia sp.        |
| WP_110605874.1 | Glucans biosynthesis protein MdoG                                            | Serratia plymuthica |
| WP_110605936.1 | Hypothetical protein                                                         | Serratia plymuthica |
| WP_111738404.1 | Peptidoglycan glycosyltransferase FtsI                                       | Serratia plymuthica |
| WP_111738524.1 | Outer membrane channel protein TolC                                          | Serratia plymuthica |
| WP_111738537.1 | Bacterioferritin                                                             | Serratia plymuthica |
| WP_119802578.1 | DUF2498 family protein                                                       | Serratia sp.        |
| WP_119803235.1 | NADP-dependent isocitrate dehydrogenase                                      | Serratia sp.        |
| WP_120978333.1 | Transketolase                                                                | Serratia plymuthica |
| WP_120978363.1 | Molecular chaperone HtpG                                                     | Serratia plymuthica |
| WP_120978375.1 | Type 1 fimbrial protein                                                      | Serratia plymuthica |
| WP_122288565.1 | Bifunctional glucose-1-phosphatase/inositol phosphatase                      | Serratia plymuthica |
| WP_122288636.1 | YcjX family protein                                                          | Serratia plymuthica |
| WP_122288643.1 | Heat shock protein HslJ                                                      | Serratia plymuthica |
| WP_122288665.1 | Protein phosphatase CheZ                                                     | Serratia plymuthica |
| WP_122288670.1 | Flagellar hook-associated protein FLgK                                       | Serratia plymuthica |
| WP_122288686.1 | Acid phosphatase                                                             | Serratia plymuthica |
| WP_122288733.1 | Valine-tRNA ligase                                                           | Serratia plymuthica |
| WP_122288792.1 | Small-conductance mechanosensitive channel MscS                              | Serratia plymuthica |
| WP_122288797.1 | Xaa-Pro aminopeptidase                                                       | Serratia plymuthica |
| WP_122288801.1 | Aminomethyl-transferring glycine dehydrogenase                               | Serratia plymuthica |
| WP_122288861.1 | DUF3313 domain-containing protein                                            | Serratia plymuthica |
| WP_122288872.1 | S9 family peptidase                                                          | Serratia plymuthica |
| WP_122288873.1 | 4-hydroxy-tetrahydrodipicolinate synthase                                    | Serratia plymuthica |

| Protein code   | Protein identification                                                          | Reference organism  |
|----------------|---------------------------------------------------------------------------------|---------------------|
| WP_122288887.1 | Serine endoprotease DegQ                                                        | Serratia plymuthica |
| WP_122288888.1 | Penicillin-binding protein activator                                            | Serratia plymuthica |
| WP_122288902.1 | Matrixin family metalloprotease                                                 | Serratia plymuthica |
| WP_122288941.1 | Methionine synthase                                                             | Serratia plymuthica |
| WP_122288956.1 | L,D-transpeptidase family protein                                               | Serratia plymuthica |
| WP_122288989.1 | Fe-S protein assembly chaperone HscA                                            | Serratia plymuthica |
| WP_122289004.1 | Glycoside hydrolase family 68 protein                                           | Serratia plymuthica |
| WP_122289073.1 | Multicopper oxidase CueO                                                        | Serratia plymuthica |
| WP_122289110.1 | NAD(P)H nitroreductase                                                          | Serratia plymuthica |
| WP_122289113.1 | Oligopeptide ABC transporter substrate-binding protein OppA                     | Serratia plymuthica |
| WP_122289146.1 | Chitin-binding protein                                                          | Serratia plymuthica |
| WP_122289173.1 | D-alanyl-D-alanine-carboxypeptidase/endopeptidase AmpH                          | Serratia plymuthica |
| WP_122289180.1 | Phosphopentomutase                                                              | Serratia plymuthica |
| WP_122289187.1 | LPS assembly protein LptD                                                       | Serratia plymuthica |
| WP_122289200.1 | ABC transporter substrate-binding protein                                       | Serratia plymuthica |
| WP_122289282.1 | PTS N-acetyl glucosamine transporter subunit IIA <sub>BC</sub>                  | Serratia plymuthica |
| WP_122289290.1 | Endolytic peptidoglycan transglycosylase RlpA                                   | Serratia plymuthica |
| WP_122289298.1 | Family 20 glycosylhydrolase                                                     | Serratia plymuthica |
| WP_122289313.1 | Proline-tRNA ligase                                                             | Serratia plymuthica |
| WP_122289361.1 | Antirestriction protein                                                         | Serratia plymuthica |
| WP_122289388.1 | Maltose/maltodextrin ABC transporter substrate-binding protein MalE             | Serratia plymuthica |
| WP_122289463.1 | Phenylalanine-tRNA ligase subunit beta                                          | Serratia plymuthica |
| WP_122289546.1 | Alanine-tRNA ligase                                                             | Serratia plymuthica |
| WP_122289575.1 | Fe2+-enterobactin ABC transporter substrate-binding protein                     | Serratia plymuthica |
| WP_122289580.1 | Cytidine deaminase                                                              | Serratia plymuthica |
| WP_122289584.1 | Molybdopterin molybdotransferase MoeA                                           | Serratia plymuthica |
| WP_122289609.1 | Acetyl-CoA carboxylase, carboxyltransferase subunit beta                        | Serratia plymuthica |
| WP_122289614.1 | NADH-quinone oxidoreductase subunit NuoF                                        | Serratia plymuthica |
| WP_122289658.1 | 16S rRNA (cytosine(1402)-N(4))-methyltransferase RsmH                           | Serratia plymuthica |
| WP_122289663.1 | Thiol:disulfide interchange protein DsbA                                        | Serratia plymuthica |
| WP_122289706.1 | Histidine phosphatase family protein                                            | Serratia plymuthica |
| WP_122289728.1 | Chaperonin GroEL                                                                | Serratia plymuthica |
| WP_122289729.1 | Fumarate reductase (quinol) flavoprotein subunit                                | Serratia plymuthica |
| WP_122289796.1 | DUF2974 domain-containing protein                                               | Serratia plymuthica |
| WP_122289827.1 | Xaa-Pro dipeptidase                                                             | Serratia plymuthica |
| WP_122289835.1 | Matrixin family metalloprotease                                                 | Serratia plymuthica |
| WP_122289854.1 | Redox-regulated ATPase YchF                                                     | Serratia plymuthica |
| WP_122290032.1 | Peptidylprolyl isomerase a                                                      | Serratia plymuthica |
| WP_122290046.1 | Hypothetical protein                                                            | Serratia plymuthica |
| WP_126479624.1 | Transcription termination factor Rho                                            | Serratia plymuthica |
| WP_126479690.1 | Porphobilinogen synthase                                                        | Serratia plymuthica |
| WP_126479692.1 | Dipeptidase PepE                                                                | Serratia plymuthica |
| WP_126479796.1 | FtsH protease activity modulator HflK                                           | Serratia plymuthica |
| WP_126479804.1 | Ribonuclease R                                                                  | Serratia plymuthica |
| WP_126479829.1 | Outer membrane protein assembly factor                                          | Serratia plymuthica |
| WP_126479856.1 | Translation initiation factor IF-2                                              | Serratia plymuthica |
| WP_126479860.1 | DEAD/DEAH family ATP-dependent RNA helicase                                     | Serratia plymuthica |
| WP_126480109.1 | Thymidine phosphorylase                                                         | Serratia plymuthica |
| WP_126480153.1 | Molecular chaperone DnaJ                                                        | Serratia plymuthica |
| WP_126480159.1 | Isoleucine-tRNA ligase                                                          | Serratia plymuthica |
| WP_126480171.1 | Glutamine-hydrolyzing carbamoyl-phosphate synthase small subunit                | Serratia plymuthica |
| WP_126480223.1 | Catabolite repressor/activator                                                  | Serratia plymuthica |
| WP_126480237.1 | Undecaprenyldiphospho-muramoylpentapeptide beta-N-acetylglucosaminyltransferase | Serratia plymuthica |
| WP_126480247.1 | Preprotein translocase subunit SecA                                             | Serratia plymuthica |
| WP_126480265.1 | Glutamate-1-semialdehyde 2,1-aminomutase                                        | Serratia plymuthica |
| WP_126480329.1 | Phosphoadenylyl-sulfate reductase                                               | Serratia plymuthica |
| WP_126480368.1 | Recombinase RecA                                                                | Serratia plymuthica |
| WP_126480386.1 | DUF481 domain-containing protein                                                | Serratia plymuthica |
| WP_126480399.1 | ATP-dependent chaperone ClpB                                                    | Serratia plymuthica |
| WP_126480508.1 | Na(+)-translocating NADH-quinone reductase subunit C                            | Serratia plymuthica |
| WP_126480520.1 | Beta-Ala-His dipeptidase                                                        | Serratia plymuthica |

| Protein code   | Protein identification                                                 | Reference organism  |
|----------------|------------------------------------------------------------------------|---------------------|
| WP_126480584.1 | DUF2076 domain-containing protein                                      | Serratia plymuthica |
| WP_126480645.1 | Gamma-glutamyltransferase [Serratia plymuthica]                        | Serratia plymuthica |
| WP_126480674.1 | YajQ family cyclic di-GMP-binding protein                              | Serratia plymuthica |
| WP_126480684.1 | Cytochrome o ubiquinol oxidase subunit II                              | Serratia plymuthica |
| WP_126480690.1 | Endopeptidase La                                                       | Serratia plymuthica |
| WP_126480757.1 | Multidrug efflux RND transporter periplasmic adaptor subunit SdeX      | Serratia plymuthica |
| WP_126480797.1 | Co-chaperone YbbN                                                      | Serratia plymuthica |
| WP_126480896.1 | Glucosamine-6-phosphate deaminase                                      | Serratia plymuthica |
| WP_126480952.1 | Citrate synthase                                                       | Serratia plymuthica |
| WP_126480956.1 | Succinate dehydrogenase flavoprotein subunit                           | Serratia plymuthica |
| WP_126480958.1 | Succinate dehydrogenase iron-sulfur subunit                            | Serratia plymuthica |
| WP_126480972.1 | Tol-Pal system protein TolB                                            | Serratia plymuthica |
| WP_126480974.1 | Cell division protein CpoB                                             | Serratia plymuthica |
| WP_126481105.1 | ABC transporter substrate-binding protein                              | Serratia plymuthica |
| WP_126481301.1 | Glutamine ABC transporter substrate-binding protein GlnH               | Serratia plymuthica |
| WP_126481381.1 | ABC-f family ATPase                                                    | Serratia plymuthica |
| WP_126481398.1 | S-formylglutathione hydrolase                                          | Serratia plymuthica |
| WP_126481621.1 | 30S ribosomal protein S12 methylthiotransferase accessory protein YcaO | Serratia plymuthica |
| WP_126481625.1 | 3-phosphoserine/phosphohydroxythreonine transaminase                   | Serratia plymuthica |
| WP_126481629.1 | (d)CMP kinase                                                          | Serratia plymuthica |
| WP_126481653.1 | Aspartate/tyrosine/aromatic aminotransferase                           | Serratia plymuthica |
| WP_126481671.1 | Quinone-dependent dihydroorotate dehydrogenase                         | Serratia plymuthica |
| WP_126481690.1 | Porin OmpA                                                             | Serratia plymuthica |
| WP_126481850.1 | Universal stress protein                                               | Serratia plymuthica |
| WP_126481930.1 | LuxR family transcriptional regulator                                  | Serratia plymuthica |
| WP_126481956.1 | ACP S-malonyltransferase                                               | Serratia plymuthica |
| WP_126481958.1 | 3-oxoacyl-ACP reductase FabG                                           | Serratia plymuthica |
| WP_126481970.1 | PTS glucose transporter subunit IIbc                                   | Serratia plymuthica |
| WP_126482134.1 | Cupin domain-containing protein                                        | Serratia plymuthica |
| WP_126482196.1 | Nucleoside-specific channel-forming protein Tsx                        | Serratia plymuthica |
| WP_126482255.1 | RNA chaperone ProQ                                                     | Serratia plymuthica |
| WP_126482297.1 | Phenylalanine--tRNA ligase subunit beta                                | Serratia plymuthica |
| WP_126482406.1 | Tyrosine--tRNA ligase                                                  | Serratia plymuthica |
| WP_126482500.1 | DUF1283 family protein                                                 | Serratia plymuthica |
| WP_126482526.1 | 6-phospho-alpha-glucosidase                                            | Serratia plymuthica |
| WP_126482598.1 | Sugar ABC transporter substrate-binding protein                        | Serratia plymuthica |
| WP_126482879.1 | Iron ABC transporter substrate-binding protein                         | Serratia plymuthica |
| WP_126482963.1 | Serine protease                                                        | Serratia plymuthica |
| WP_126482993.1 | Oligopeptide abc transporter substrate-binding protein OppA            | Serratia plymuthica |
| WP_126483037.1 | Exoribonuclease II                                                     | Serratia plymuthica |
| WP_126483066.1 | Threonylcarbamoyl-AMP synthase                                         | Serratia plymuthica |
| WP_126483126.1 | Exodeoxyribonuclease III                                               | Serratia plymuthica |
| WP_126483181.1 | Fumarylacetoacetate hydrolase family protein                           | Serratia plymuthica |
| WP_126483185.1 | Septum site-determining protein MinC                                   | Serratia plymuthica |
| WP_126483203.1 | Glucose-6-phosphate dehydrogenase                                      | Serratia plymuthica |
| WP_126483215.1 | YebC/PmpR family DNA-binding transcriptional regulator                 | Serratia plymuthica |
| WP_126483217.1 | Aspartate--tRNA ligase                                                 | Serratia plymuthica |
| WP_126483270.1 | PTS mannose transporter subunit IIAB                                   | Serratia plymuthica |
| WP_126483286.1 | Hypothetical protein                                                   | Serratia plymuthica |
| WP_126483290.1 | Hypothetical protein                                                   | Serratia plymuthica |
| WP_126483508.1 | NADP-dependent oxidoreductase                                          | Serratia plymuthica |
| WP_126483916.1 | Nitroreductase family protein                                          | Serratia plymuthica |
| WP_126484047.1 | 1-phosphofructokinase                                                  | Serratia plymuthica |
| WP_126484117.1 | DNA topoisomerase (ATP-hydrolyzing) subunit A                          | Serratia plymuthica |
| WP_126484181.1 | Acetate kinase                                                         | Serratia plymuthica |
| WP_126484195.1 | Histidine ABC transporter substrate-binding protein HisJ               | Serratia plymuthica |
| WP_126484206.1 | Acetyl-CoA carboxylase, carboxyltransferase subunit beta               | Serratia plymuthica |
| WP_126484259.1 | Acetyl-CoA C-acyltransferase FadI                                      | Serratia plymuthica |
| WP_126484369.1 | Phosphoenolpyruvate-protein phosphotransferase PtsI                    | Serratia plymuthica |
| WP_126484392.1 | YgiW/YdeI family stress tolerance OB fold protein                      | Serratia plymuthica |
| WP_126484412.1 | Transaldolase                                                          | Serratia plymuthica |
| WP_126484422.1 | Nitrate reductase cytochrome c-type subunit                            | Serratia plymuthica |



| Protein code   | Protein identification                                                                          | Reference organism  |
|----------------|-------------------------------------------------------------------------------------------------|---------------------|
| WP_126484466.1 | Phosphoribosylaminoimidazolesuccinocarboxamide synthase                                         | Serratia plymuthica |
| WP_126484586.1 | IMP dehydrogenase                                                                               | Serratia plymuthica |
| WP_126484604.1 | Outer membrane protein assembly factor BamB                                                     | Serratia plymuthica |
| WP_126484608.1 | Histidine--tRNA ligase                                                                          | Serratia plymuthica |
| WP_126484626.1 | IscS subfamily cysteine desulfurase                                                             | Serratia plymuthica |
| WP_126484642.1 | Two-component system QseEF-associated lipoprotein QseG                                          | Serratia plymuthica |
| WP_126484735.1 | DUF883 domain-containing protein                                                                | Serratia plymuthica |
| WP_126484810.1 | Cytochrome c                                                                                    | Serratia plymuthica |
| WP_126484832.1 | 30S ribosomal protein S2                                                                        | Serratia plymuthica |
| WP_126484836.1 | 2,3,4,5-tetrahydropyridine-2,6-dicarboxylate N-succinyltransferase                              | Serratia plymuthica |
| WP_126484840.1 | Flavodoxin                                                                                      | Serratia plymuthica |
| WP_126484855.1 | Murein transglycosylase A                                                                       | Serratia plymuthica |
| WP_126484983.1 | Cold-shock protein                                                                              | Serratia plymuthica |
| WP_126484993.1 | Lysine--tRNA ligase                                                                             | Serratia plymuthica |
| WP_126485047.1 | Aminomethyl--transferring glycine dehydrogenase                                                 | Serratia plymuthica |
| WP_126485049.1 | Glycine cleavage system protein GcvH                                                            | Serratia plymuthica |
| WP_126485113.1 | Methionine adenosyltransferase                                                                  | Serratia plymuthica |
| WP_126485170.1 | Fumarate hydratase                                                                              | Serratia plymuthica |
| WP_126485184.1 | XTP/dITP diphosphatase                                                                          | Serratia plymuthica |
| WP_126485188.1 | DUF2884 domain-containing protein                                                               | Serratia plymuthica |
| WP_126485323.1 | Alcohol dehydrogenase                                                                           | Serratia plymuthica |
| WP_126485325.1 | 2,5-didehydrogluconate reductase DkgA                                                           | Serratia plymuthica |
| WP_126485345.1 | Antibiotic biosynthesis monooxygenase [Serratia plymuthica]                                     | Serratia plymuthica |
| WP_126485476.1 | Glutamate synthase large subunit                                                                | Serratia plymuthica |
| WP_126485488.1 | UDP-N-acetylglucosamine 1-carboxyvinyltransferase                                               | Serratia plymuthica |
| WP_126485494.1 | Phospholipid-binding protein MlaC                                                               | Serratia plymuthica |
| WP_126485560.1 | Rod shape-determining protein                                                                   | Enterobacterales    |
| WP_126485572.1 | Acetyl-CoA carboxylase biotin carboxylase subunit                                               | Serratia plymuthica |
| WP_126485607.1 | Single-stranded DNA-binding protein SSB1                                                        | Serratia plymuthica |
| WP_126485701.1 | FKBP-type peptidyl-prolyl cis-trans isomerase                                                   | Serratia plymuthica |
| WP_126485743.1 | Tryptophan--tRNA ligase                                                                         | Serratia plymuthica |
| WP_126485884.1 | Inorganic phosphate transporter PitA                                                            | Serratia plymuthica |
| WP_126485956.1 | ATP-independent periplasmic protein-refolding chaperone                                         | Serratia plymuthica |
| WP_126485974.1 | Ketol-acid reductoisomerase                                                                     | Serratia plymuthica |
| WP_126486035.1 | Glycerol kinase GlpK                                                                            | Serratia plymuthica |
| WP_126486053.1 | Protein-export chaperone SecB                                                                   | Serratia plymuthica |
| WP_126486090.1 | YicC family protein                                                                             | Serratia plymuthica |
| WP_126486128.1 | Ribosome-dependent GTPase TypA                                                                  | Serratia plymuthica |
| WP_126486171.1 | Phosphate ABC transporter substrate-binding protein PstS                                        | Serratia plymuthica |
| WP_126486177.1 | ABC transporter substrate-binding protein                                                       | Serratia plymuthica |
| WP_126486190.1 | NAD(P)H-dependent oxidoreductase                                                                | Serratia plymuthica |
| WP_126486279.1 | 2-oxoglutarate dehydrogenase E1 component                                                       | Serratia plymuthica |
| WP_126486293.1 | Methionine ABC transporter substrate-binding protein                                            | Serratia plymuthica |
| WP_126486297.1 | S-(hydroxymethyl)glutathione dehydrogenase/class III alcohol dehydrogenase                      | Serratia plymuthica |
| WP_126486343.1 | Bifunctional UDP-4-amino-4-deoxy-l-arabinose formyltransferase/UDP-glucuronic acid oxidase ArnA | Serratia plymuthica |
| WP_126486374.1 | Diaminobutyrate--2-oxoglutarate transaminase                                                    | Serratia plymuthica |
| WP_126486390.1 | Zinc ABC transporter substrate-binding protein ZnuA                                             | Serratia plymuthica |
| WP_126527292.1 | DNA topoisomerase (ATP-hydrolyzing) subunit B                                                   | Serratia plymuthica |
| WP_126527305.1 | Glycine--tRNA ligase subunit beta                                                               | Serratia plymuthica |
| WP_126527311.1 | Superoxide dismutase [Mn]                                                                       | Serratia plymuthica |
| WP_126527372.1 | Uridine phosphorylase                                                                           | Serratia plymuthica |
| WP_126527385.1 | Aspartate ammonia-lyase                                                                         | Serratia plymuthica |
| WP_126527387.1 | Fumarate reductase subunit FrdC                                                                 | Serratia plymuthica |
| WP_126527388.1 | Succinate dehydrogenase/fumarate reductase iron-sulfur subunit                                  | Serratia plymuthica |
| WP_126527389.1 | Fumarate reductase (quinol) flavoprotein subunit                                                | Serratia plymuthica |
| WP_126527395.1 | N-acetylmuramoyl-L-alanine amidase AmiB                                                         | Serratia plymuthica |
| WP_126527408.1 | N-acetyltransferase                                                                             | Serratia plymuthica |
| WP_126527417.1 | PTS trehalose transporter subunit IIbc                                                          | Serratia plymuthica |
| WP_126527429.1 | Valine--tRNA ligase                                                                             | Serratia plymuthica |
| WP_126527433.1 | Carbonic anhydrase                                                                              | Serratia plymuthica |
| WP_126527472.1 | Molybdopterin adenylyltransferase                                                               | Serratia plymuthica |



| Protein code   | Protein identification                                                                | Reference organism  |
|----------------|---------------------------------------------------------------------------------------|---------------------|
| WP_126527482.1 | Thiamine ABC transporter substrate binding subunit                                    | Serratia plymuthica |
| WP_126527496.1 | Serine endoprotease DegP                                                              | Serratia plymuthica |
| WP_126527517.1 | Murein hydrolase activator NlpD                                                       | Serratia plymuthica |
| WP_126527586.1 | Hypothetical protein                                                                  | Serratia plymuthica |
| WP_126527624.1 | Lipoyl synthase                                                                       | Serratia plymuthica |
| WP_126527625.1 | D-alanyl-D-alanine carboxypeptidase DacA                                              | Serratia plymuthica |
| WP_126527630.1 | Leucine--tRNA ligase                                                                  | Serratia plymuthica |
| WP_126527633.1 | N-acetylglucosamine-6-phosphate deacetylase                                           | Serratia plymuthica |
| WP_126527646.1 | 3-deoxy-7-phosphoheptulonate synthase AroG                                            | Serratia plymuthica |
| WP_126527665.1 | Adenosylhomocysteinase                                                                | Serratia plymuthica |
| WP_126527752.1 | UTP--glucose-1-phosphate uridylyltransferase GalU                                     | Serratia plymuthica |
| WP_126527781.1 | Pyridoxal-phosphate dependent enzyme                                                  | Serratia plymuthica |
| WP_126527796.1 | Cell division protein FtsK                                                            | Serratia plymuthica |
| WP_126527801.1 | Formate transporter FocA                                                              | Serratia plymuthica |
| WP_126527862.1 | Hypothetical protein                                                                  | Serratia plymuthica |
| WP_126527876.1 | Ribonuclease E                                                                        | Serratia plymuthica |
| WP_126527887.1 | Non-heme ferritin                                                                     | Serratia plymuthica |
| WP_126527912.1 | Trans-2-enoyl-CoA reductase family protein                                            | Serratia plymuthica |
| WP_126528017.1 | ATP-dependent dethiobiotin synthetase BioD                                            | Serratia plymuthica |
| WP_126528198.1 | Outer membrane protein OmpW                                                           | Serratia plymuthica |
| WP_126528222.1 | Copper homeostasis protein CutC                                                       | Serratia plymuthica |
| WP_126528225.1 | Arginine--tRNA ligase                                                                 | Serratia plymuthica |
| WP_126528421.1 | Citrate (pro-3S)-lyase subunit beta                                                   | Serratia plymuthica |
| WP_126528468.1 | DNA topoisomerase (ATP-hydrolyzing) subunit A                                         | Serratia plymuthica |
| WP_126528469.1 | Ribonucleoside-diphosphate reductase subunit alpha                                    | Serratia plymuthica |
| WP_126528470.1 | 1,4-dihydroxy-2-naphthoyl-CoA synthase                                                | Serratia plymuthica |
| WP_126528531.1 | Cysteine synthase A                                                                   | Serratia plymuthica |
| WP_126528575.1 | Class I fructose-bisphosphate aldolase                                                | Serratia plymuthica |
| WP_126528619.1 | DUF3131 domain-containing protein                                                     | Serratia plymuthica |
| WP_126528642.1 | TRNA/rRNA methyltransferase                                                           | Serratia plymuthica |
| WP_126528651.1 | Outer membrane protein assembly factor BamA                                           | Serratia plymuthica |
| WP_126528657.1 | YgdI/YgdR family lipoprotein                                                          | Serratia plymuthica |
| WP_126528703.1 | Phosphoglycerate dehydrogenase                                                        | Serratia plymuthica |
| WP_126528704.1 | Oxidative stress defense protein                                                      | Serratia plymuthica |
| WP_126528787.1 | Glycerol dehydrogenase                                                                | Serratia plymuthica |
| WP_126528793.1 | tRNA (adenosine(37)-N6)-threonylcarbamoyltransferase complex transferase subunit TsaD | Serratia plymuthica |
| WP_126528827.1 | Acetyl-CoA carboxylase biotin carboxyl carrier protein                                | Serratia plymuthica |
| WP_126528838.1 | Excinuclease ABC subunit UvrA                                                         | Serratia plymuthica |
| WP_126528846.1 | Maltose/maltodextrin ABC transporter substrate-binding protein MalE                   | Serratia plymuthica |
| WP_126528863.1 | Peptidylprolyl isomerase                                                              | Serratia plymuthica |
| WP_126528873.1 | DUF853 family protein                                                                 | Serratia plymuthica |
| WP_126528909.1 | Autoinducer 2 ABC transporter substrate-binding protein                               | Serratia plymuthica |
| WP_126528913.1 | Oligopeptidase A                                                                      | Serratia plymuthica |
| WP_126528923.1 | Dihydroxy-acid dehydratase                                                            | Serratia plymuthica |
| WP_126528932.1 | Met regulon transcriptional regulator MetJ                                            | Serratia plymuthica |
| WP_126528997.1 | Galactokinase                                                                         | Serratia plymuthica |
| WP_126529004.1 | GalU regulator GalF                                                                   | Serratia plymuthica |
| WP_126529065.1 | Ribose ABC transporter substrate-binding protein RbsB                                 | Serratia plymuthica |
| WP_145917148.1 | Serine-type D-Ala-D-Ala carboxypeptidase                                              | Serratia plymuthica |
| WP_148661052.1 | Peptide-methionine (S)-S-oxide reductase MsrA                                         | Serratia plymuthica |
| WP_148661053.1 | Sulfate adenyllyltransferase subunit CysN                                             | Serratia plymuthica |
| WP_148661070.1 | Glucokinase                                                                           | Serratia plymuthica |
| WP_148669238.1 | Formate dehydrogenase-N subunit alpha                                                 | Serratia plymuthica |
| WP_148669243.1 | 3-hydroxyacyl-ACP dehydratase FabZ                                                    | Serratia plymuthica |

**Table S3.** Differential expression of proteins in Ra4 (*Rahnella aquatilis*) treated with 0.4% NaCl vs Control.

| Row | Index | Protein code   | Protein identification                                                                                        | Reference organism        | p-value  | Fold Change | Log (Fold Change) |
|-----|-------|----------------|---------------------------------------------------------------------------------------------------------------|---------------------------|----------|-------------|-------------------|
| 157 | 169   | WP_113877445.1 | FliC/FliB family flagellin                                                                                    | Rahnella aquatilis        | 0.0048   | 0.013243427 | -1.877999625      |
| 250 | 588   | WP_013575778.1 | MULTISPECIES: FliC/FliB family flagellin                                                                      | Rahnella sp.              | 0.01703  | 0.017814571 | -1.749224629      |
| 56  | 326   | WP_047609302.1 | chemotaxis protein CheW                                                                                       | Rahnella aquatilis        | 0.00032  | 0.03040935  | -1.516992867      |
| 11  | 613   | WP_112288147.1 | MULTISPECIES: peptide deformylase                                                                             | Rahnella sp.              | 3.66E-05 | 0.043071557 | -1.365809425      |
| 289 | 423   | WP_112290707.1 | MULTISPECIES: PTS glucose transporter subunit IIA                                                             | Rahnella sp.              | 0.02871  | 0.05096507  | -1.292727376      |
| 18  | 478   | WP_131638206.1 | phosphoribosylformylglycinamide synthase                                                                      | Rahnella aquatilis        | 6.72E-05 | 0.075575677 | -1.121617954      |
| 159 | 643   | WP_112197122.1 | MULTISPECIES: undecaprenyl-phosphate 4-deoxy-4-formamido-L-arabinose transferase                              | Rahnella sp.              | 0.00492  | 0.076578968 | -1.115890491      |
| 245 | 120   | WP_122288902.1 | matrixin family metalloprotease                                                                               | Serratia plymuthica       | 0.01577  | 0.08052534  | -1.094067434      |
| 264 | 402   | WP_073439293.1 | flagellar hook assembly protein FlgD                                                                          | Serratia plymuthica       | 0.01948  | 0.086506604 | -1.062950738      |
| 32  | 374   | AGO55878.1     | alpha-galactosidase MelA                                                                                      | Serratia plymuthica 4Rx13 | 0.00013  | 0.089424298 | -1.048544463      |
| 8   | 17    | WP_122288670.1 | flagellar hook-associated protein FlgK                                                                        | Serratia plymuthica       | 2.47E-05 | 0.094506119 | -1.02454007       |
| 23  | 103   | WP_112197123.1 | MULTISPECIES: bifunctional UDP-4-amino-4-deoxy-L-arabinose formyltransferase/UDP-glucuronic acid oxidase ArnA | Rahnella sp.              | 9.51E-05 | 0.101017683 | -0.995602596      |
| 256 | 218   | WP_065506321.1 | MULTISPECIES: pyruvate kinase                                                                                 | Serratia sp.              | 0.01821  | 0.104143274 | -0.982368773      |
| 182 | 560   | WP_131638012.1 | phage tail sheath protein                                                                                     | Rahnella aquatilis        | 0.00797  | 0.104880764 | -0.979304156      |
| 91  | 158   | WP_122289835.1 | matrixin family metalloprotease                                                                               | Serratia plymuthica       | 0.00097  | 0.115805986 | -0.936268991      |
| 117 | 621   | WP_014333680.1 | HAMP domain-containing protein                                                                                | Rahnella aquatilis        | 0.00185  | 0.117243237 | -0.9309122        |
| 315 | 386   | WP_113876955.1 | glutamate-tRNA ligase                                                                                         | Rahnella aquatilis        | 0.03761  | 0.12898579  | -0.889458132      |
| 326 | 614   | WP_037433008.1 | outer membrane protein OmpW                                                                                   | Serratia plymuthica       | 0.04322  | 0.129590449 | -0.887427004      |
| 150 | 659   | WP_006324221.1 | MULTISPECIES: D-alanine-D-alanine ligase                                                                      | Serratia sp.              | 0.00448  | 0.16959818  | -0.770578812      |
| 88  | 710   | WP_126528873.1 | DUF853 family protein                                                                                         | Serratia plymuthica       | 0.00093  | 0.202929681 | -0.692654427      |
| 336 | 353   | WP_015698114.1 | succinate dehydrogenase iron-sulfur subunit                                                                   | Rahnella aquatilis        | 0.04814  | 0.205885606 | -0.686374016      |
| 153 | 377   | WP_126485956.1 | ATP-independent periplasmic protein-refolding chaperone                                                       | Serratia plymuthica       | 0.00458  | 0.224236154 | -0.649294363      |
| 340 | 807   | WP_062869793.1 | DUF2501 domain-containing protein                                                                             | Serratia plymuthica       | 0.04981  | 0.226595451 | -0.644748814      |
| 283 | 853   | WP_006322514.1 | MULTISPECIES: 23S rRNA accumulation protein YceD                                                              | Serratia sp.              | 0.02529  | 0.2364057   | -0.626342057      |
| 320 | 618   | WP_006322046.1 | MULTISPECIES: elongation factor P                                                                             | Serratia sp.              | 0.04012  | 0.238759467 | -0.622039399      |
| 319 | 379   | WP_122289388.1 | maltose/maltodextrin ABC transporter substrate-binding protein MalE                                           | Serratia plymuthica       | 0.03908  | 0.238969634 | -0.621657282      |
| 274 | 474   | WP_112289342.1 | MULTISPECIES: glycerol kinase GlpK                                                                            | Rahnella sp.              | 0.02204  | 0.239061508 | -0.621490346      |
| 90  | 48    | WP_112290864.1 | MULTISPECIES: glutamine-fructose-6-phosphate transaminase (isomerizing)                                       | Rahnella sp.              | 0.00096  | 0.261280956 | -0.582892243      |
| 323 | 7     | WP_004945953.1 | MULTISPECIES: flagellar filament capping protein FlgD                                                         | Serratia sp.              | 0.0419   | 0.262298201 | -0.581204689      |
| 44  | 309   | WP_126528787.1 | glycerol dehydrogenase                                                                                        | Serratia plymuthica       | 0.00018  | 0.271924037 | -0.565552401      |

| Row | Index | Protein code   | Protein identification                                                         | Reference organism  | p-value  | Fold Change | Log (Fold Change) |
|-----|-------|----------------|--------------------------------------------------------------------------------|---------------------|----------|-------------|-------------------|
| 180 | 821   | WP_006319070.1 | MULTISPECIES: ribulose-phosphate 3-epimerase                                   | Serratia sp.        | 0.00714  | 0.277532813 | -0.556685662      |
| 110 | 628   | WP_131638522.1 | guanylate kinase                                                               | Rahnella aquatilis  | 0.00157  | 0.277999707 | -0.555955663      |
| 252 | 790   | WP_126529004.1 | GalU regulator GalF                                                            | Serratia plymuthica | 0.01745  | 0.282958724 | -0.548276912      |
| 103 | 281   | WP_113878254.1 | aminomethyl-transferring glycine dehydrogenase                                 | Rahnella aquatilis  | 0.00137  | 0.285681729 | -0.544117535      |
| 16  | 185   | WP_112290710.1 | MULTISPECIES: cysteine synthase A                                              | Rahnella sp.        | 5.71E-05 | 0.286049602 | -0.543558652      |
| 279 | 348   | WP_126481625.1 | 3-phosphoserine/phosphohydroxythreonine transaminase                           | Serratia plymuthica | 0.0236   | 0.28889226  | -0.539264093      |
| 249 | 249   | WP_013577652.1 | MULTISPECIES: glutamate--ammonia ligase                                        | Rahnella sp.        | 0.01611  | 0.294674486 | -0.530657465      |
| 302 | 358   | WP_112290918.1 | MULTISPECIES: xanthine phosphoribosyltransferase                               | Rahnella sp.        | 0.03308  | 0.310067868 | -0.508543237      |
| 25  | 567   | WP_015698255.1 | phosphoribosylformylglycinamide cyclo-ligase                                   | Rahnella aquatilis  | 9.63E-05 | 0.316959074 | -0.49899681       |
| 120 | 611   | WP_013812178.1 | MULTISPECIES: galactose/glucose ABC transporter substrate-binding protein MglB | Serratia sp.        | 0.002    | 0.324112862 | -0.489303734      |
| 209 | 739   | WP_126484047.1 | 1-phosphofructokinase                                                          | Serratia plymuthica | 0.01103  | 0.328934239 | -0.482890918      |
| 163 | 237   | WP_131638766.1 | ATP-dependent Clp protease ATP-binding subunit ClpA                            | Rahnella aquatilis  | 0.00507  | 0.330828472 | -0.480397121      |
| 333 | 276   | WP_013573634.1 | MULTISPECIES: cAMP-activated global transcriptional regulator CRP              | Yersiniaceae        | 0.047    | 0.334773782 | -0.475248561      |
| 277 | 489   | WP_073440262.1 | aspartate-semialdehyde dehydrogenase                                           | Serratia plymuthica | 0.02332  | 0.336726414 | -0.472722815      |
| 221 | 401   | WP_113877256.1 | diaminobutyrate--2-oxoglutarate transaminase                                   | Rahnella aquatilis  | 0.0122   | 0.34086544  | -0.46741703       |
| 324 | 128   | WP_013811266.1 | MULTISPECIES: malate dehydrogenase                                             | Serratia sp.        | 0.04221  | 0.34299365  | -0.46471392       |
| 299 | 146   | WP_006317741.1 | MULTISPECIES: triose-phosphate isomerase                                       | Serratia sp.        | 0.03216  | 0.34528417  | -0.461823332      |
| 195 | 785   | WP_126482255.1 | RNA chaperone ProQ                                                             | Serratia plymuthica | 0.00944  | 0.346126942 | -0.460764594      |
| 141 | 781   | WP_062868532.1 | phosphoglycerate dehydrogenase                                                 | Serratia plymuthica | 0.00385  | 0.346548292 | -0.460236237      |
| 205 | 470   | WP_015696652.1 | formate transporter FocA                                                       | Rahnella aquatilis  | 0.01072  | 0.350113543 | -0.45579109       |
| 179 | 344   | WP_095925026.1 | MULTISPECIES: uracil phosphoribosyltransferase                                 | Rahnella sp.        | 0.00703  | 0.355261021 | -0.449452441      |
| 31  | 336   | WP_119261297.1 | MetQ/NlpA family lipoprotein                                                   | Rahnella aquatilis  | 0.00012  | 0.357408909 | -0.446834626      |
| 332 | 460   | WP_047608889.1 | phosphoribosylaminoimidazolesuccinocarboxamide synthase                        | Rahnella aquatilis  | 0.04596  | 0.359224323 | -0.444634264      |
| 154 | 236   | WP_073439268.1 | PLP-dependent transferase                                                      | Serratia plymuthica | 0.00462  | 0.364174638 | -0.438690303      |
| 35  | 512   | WP_126485047.1 | aminomethyl-transferring glycine dehydrogenase                                 | Serratia plymuthica | 0.00013  | 0.36628356  | -0.436182574      |
| 235 | 390   | WP_006321796.1 | MULTISPECIES: FOF1 ATP synthase subunit gamma                                  | Serratia sp.        | 0.01407  | 0.374340327 | -0.426733385      |
| 134 | 398   | WP_013577537.1 | MULTISPECIES: thioredoxin TrxA                                                 | Yersiniaceae        | 0.00332  | 0.374934306 | -0.42604482       |
| 337 | 112   | WP_112289181.1 | MULTISPECIES: succinate dehydrogenase flavoprotein subunit                     | Rahnella sp.        | 0.04837  | 0.37616433  | -0.424622389      |
| 84  | 466   | WP_112168192.1 | MULTISPECIES: two-component system response regulator ArcA                     | Rahnella sp.        | 0.00088  | 0.377163081 | -0.423470826      |
| 118 | 795   | WP_063177426.1 | acetolactate synthase AlsS                                                     | Serratia plymuthica | 0.00188  | 0.378852069 | -0.421530337      |
| 52  | 13    | WP_006325792.1 | bifunctional acetaldehyde-CoA/alcohol dehydrogenase                            | Serratia plymuthica | 0.00027  | 0.379442539 | -0.420853982      |
| 237 | 51    | WP_004946072.1 | MULTISPECIES: flagellar hook-filament junction protein FlgL                    | Serratia sp.        | 0.01426  | 0.380159224 | -0.420034467      |
| 149 | 255   | WP_004952855.1 | MULTISPECIES: transcription termination/antitermination protein NusA           | Serratia sp.        | 0.00448  | 0.388432791 | -0.410684114      |
| 262 | 137   | WP_131637279.1 | porin OmpC                                                                     | Rahnella aquatilis  | 0.01885  | 0.389544746 | -0.409442649      |

| Row | Index | Protein code   | Protein identification                                              | Reference organism  | p-value  | Fold Change | Log (Fold Change) |
|-----|-------|----------------|---------------------------------------------------------------------|---------------------|----------|-------------|-------------------|
| 28  | 22    | WP_015697077.1 | bifunctional acetaldehyde-CoA/alcohol dehydrogenase                 | Rahnella aquatilis  | 0.00011  | 0.391342469 | -0.407443019      |
| 82  | 285   | WP_065506483.1 | MULTISPECIES: serine hydroxymethyltransferase                       | Serratia sp.        | 0.00081  | 0.393619308 | -0.404923606      |
| 220 | 818   | WP_037433374.1 | GSH-dependent disulfide bond oxidoreductase                         | Serratia plymuthica | 0.01219  | 0.394341782 | -0.404127205      |
| 216 | 351   | WP_063200622.1 | phosphoenolpyruvate carboxykinase (ATP)                             | Serratia plymuthica | 0.01201  | 0.394390643 | -0.404073397      |
| 230 | 363   | WP_015696434.1 | amidophosphoribosyltransferase                                      | Rahnella aquatilis  | 0.01312  | 0.398048611 | -0.400063887      |
| 130 | 258   | WP_013577593.1 | MULTISPECIES: triose-phosphate isomerase                            | Rahnella sp.        | 0.00274  | 0.401240229 | -0.396595531      |
| 107 | 221   | WP_063198636.1 | energy-dependent translational throttle protein EttA                | Serratia plymuthica | 0.00151  | 0.402378869 | -0.395364834      |
| 218 | 235   | WP_122289073.1 | multicopper oxidase CueO                                            | Serratia plymuthica | 0.01204  | 0.403629267 | -0.394017351      |
| 233 | 658   | WP_126480223.1 | catabolite repressor/activator                                      | Serratia plymuthica | 0.01391  | 0.405613065 | -0.391888065      |
| 297 | 302   | WP_015698930.1 | acetyl-CoA carboxylase biotin carboxylase subunit                   | Rahnella aquatilis  | 0.03155  | 0.409216652 | -0.388046702      |
| 301 | 801   | WP_073439566.1 | peptidylprolyl isomerase                                            | Serratia plymuthica | 0.03258  | 0.409942937 | -0.387276592      |
| 310 | 296   | WP_047609936.1 | glycine--tRNA ligase subunit beta                                   | Rahnella aquatilis  | 0.03612  | 0.410035135 | -0.387178928      |
| 99  | 284   | WP_015697179.1 | glucose-6-phosphate dehydrogenase                                   | Rahnella aquatilis  | 0.0012   | 0.411042894 | -0.386112855      |
| 128 | 153   | WP_037432618.1 | asparagine--tRNA ligase                                             | Serratia plymuthica | 0.00242  | 0.414649962 | -0.38231837       |
| 57  | 657   | WP_004932501.1 | MULTISPECIES: 30S ribosomal protein S16                             | Enterobacterales    | 0.00032  | 0.417234937 | -0.379619333      |
| 41  | 67    | WP_037035301.1 | MULTISPECIES: pyruvate kinase PykF                                  | Rahnella sp.        | 0.00016  | 0.419066368 | -0.377717192      |
| 303 | 52    | WP_113877103.1 | MULTISPECIES: malate dehydrogenase                                  | Rahnella sp.        | 0.03352  | 0.423359123 | -0.373291078      |
| 69  | 465   | WP_013815047.1 | MULTISPECIES: glutamate--ammonia ligase                             | Serratia sp.        | 0.00055  | 0.425977717 | -0.370613119      |
| 271 | 516   | WP_126528846.1 | maltose/maltodextrin ABC transporter substrate-binding protein MalE | Serratia plymuthica | 0.02084  | 0.430363754 | -0.366164313      |
| 2   | 26    | WP_095924049.1 | MULTISPECIES: FOF1 ATP synthase subunit beta                        | Rahnella sp.        | 5.28E-06 | 0.432188265 | -0.364327029      |
| 321 | 509   | WP_126481850.1 | universal stress protein                                            | Serratia plymuthica | 0.04023  | 0.43496145  | -0.361549232      |
| 244 | 204   | WP_015696675.1 | asparagine--tRNA ligase                                             | Rahnella aquatilis  | 0.01552  | 0.437841776 | -0.358682803      |
| 261 | 680   | WP_122288801.1 | aminomethyl-transferring glycine dehydrogenase                      | Serratia plymuthica | 0.01856  | 0.437928352 | -0.358596937      |
| 47  | 305   | WP_131638044.1 | ribonuclease E                                                      | Rahnella aquatilis  | 0.00023  | 0.440899751 | -0.355660146      |
| 286 | 238   | WP_013577239.1 | MULTISPECIES: 50S ribosomal protein L13                             | Yersiniaceae        | 0.02749  | 0.443030743 | -0.353566136      |
| 9   | 268   | WP_013576134.1 | MULTISPECIES: 50S ribosomal protein L20                             | Yersiniaceae        | 2.87E-05 | 0.449540058 | -0.347231602      |
| 140 | 168   | WP_004947678.1 | MULTISPECIES: cysteine synthase A                                   | Serratia sp.        | 0.0038   | 0.45437863  | -0.342582102      |
| 106 | 98    | WP_126527385.1 | aspartate ammonia-lyase                                             | Serratia plymuthica | 0.00149  | 0.458567358 | -0.338596862      |
| 188 | 16    | WP_014333640.1 | chaperonin GroEL                                                    | Rahnella aquatilis  | 0.00861  | 0.458878989 | -0.338301827      |
| 142 | 475   | WP_126486128.1 | ribosome-dependent GTPase TypA                                      | Serratia plymuthica | 0.00392  | 0.460052231 | -0.337192859      |
| 61  | 292   | WP_062870646.1 | pyruvate kinase PykF                                                | Serratia plymuthica | 0.00038  | 0.460963137 | -0.336333804      |
| 89  | 541   | WP_047609862.1 | aspartate-semialdehyde dehydrogenase                                | Rahnella aquatilis  | 0.00094  | 0.462128288 | -0.335237447      |
| 62  | 726   | WP_004933536.1 | MULTISPECIES: ribosome assembly RNA-binding protein YhbY            | Enterobacterales    | 0.00038  | 0.465599351 | -0.331987634      |
| 78  | 28    | WP_013577682.1 | MULTISPECIES: FOF1 ATP synthase subunit alpha                       | Rahnella sp.        | 0.00066  | 0.466245846 | -0.331385024      |
| 36  | 147   | WP_112289290.1 | MULTISPECIES: ribosome-dependent GTPase TypA                        | Rahnella sp.        | 0.00014  | 0.466767875 | -0.330899041      |

| Row | Index | Protein code   | Protein identification                                                  | Reference organism  | p-value  | Fold Change | Log (Fold Change) |
|-----|-------|----------------|-------------------------------------------------------------------------|---------------------|----------|-------------|-------------------|
| 334 | 449   | WP_112288379.1 | MULTISPECIES: UDP-N-acetylglucosamine 1-carboxyvinyltransferase         | Rahnella sp.        | 0.04741  | 0.466784874 | -0.330883226      |
| 116 | 623   | WP_126483217.1 | aspartate--tRNA ligase                                                  | Serratia plymuthica | 0.00181  | 0.466935894 | -0.33074274       |
| 194 | 838   | WP_126527624.1 | lipoyl synthase                                                         | Serratia plymuthica | 0.00927  | 0.471989067 | -0.326068061      |
| 87  | 459   | WP_113876048.1 | glutamine--tRNA ligase                                                  | Rahnella aquatilis  | 0.00091  | 0.472267976 | -0.325811503      |
| 200 | 217   | WP_013577410.1 | MULTISPECIES: 50S ribosomal protein L7/L12                              | Yersiniaceae        | 0.01006  | 0.472850637 | -0.325276021      |
| 291 | 697   | WP_119261434.1 | aspartate/tyrosine/aromatic aminotransferase                            | Rahnella aquatilis  | 0.02895  | 0.473858624 | -0.324351211      |
| 66  | 441   | WP_004947686.1 | MULTISPECIES: PTS glucose transporter subunit IIA                       | Serratia sp.        | 0.00047  | 0.47520989  | -0.323114529      |
| 254 | 92    | WP_005969574.1 | MULTISPECIES: 30S ribosomal protein S7                                  | Enterobacterales    | 0.01762  | 0.475654901 | -0.322708024      |
| 335 | 665   | WP_013573696.1 | MULTISPECIES: 30S ribosomal protein S14                                 | Yersiniaceae        | 0.04781  | 0.476134346 | -0.32227049       |
| 95  | 350   | WP_095924936.1 | MULTISPECIES: 6,7-dimethyl-8-ribityllumazine synthase                   | Rahnella sp.        | 0.00113  | 0.478070016 | -0.320508494      |
| 38  | 472   | WP_004931195.1 | MULTISPECIES: 50S ribosomal protein L28                                 | Enterobacterales    | 0.00015  | 0.478382723 | -0.320224513      |
| 170 | 27    | WP_015695890.1 | phosphopyruvate hydratase                                               | Rahnella aquatilis  | 0.00565  | 0.47886815  | -0.319784048      |
| 139 | 671   | WP_126528470.1 | 1,4-dihydroxy-2-naphthoyl-CoA synthase                                  | Serratia plymuthica | 0.00372  | 0.480385944 | -0.318409709      |
| 162 | 769   | WP_006318638.1 | MULTISPECIES: MetQ/NlpA family lipoprotein                              | Serratia sp.        | 0.005    | 0.483056516 | -0.316002055      |
| 3   | 590   | WP_056772785.1 | MULTISPECIES: 30S ribosomal protein S16                                 | Yersiniaceae        | 7.43E-06 | 0.486097279 | -0.31327681       |
| 189 | 471   | WP_004943136.1 | MULTISPECIES: trans-2-enoyl-CoA reductase family protein                | Serratia sp.        | 0.00893  | 0.487288391 | -0.312213935      |
| 127 | 224   | WP_002221949.1 | MULTISPECIES: transcription antiterminator/RNA stability regulator CspE | Enterobacterales    | 0.00241  | 0.496734815 | -0.3038754        |
| 176 | 754   | WP_126479796.1 | FtsH protease activity modulator HflK                                   | Serratia plymuthica | 0.00642  | 0.497667424 | -0.303060786      |
| 199 | 72    | WP_062870323.1 | NADP-dependent phosphogluconate dehydrogenase                           | Serratia plymuthica | 0.00987  | 0.500853765 | -0.300289057      |
| 86  | 173   | WP_006321797.1 | MULTISPECIES: FOF1 ATP synthase subunit alpha                           | Serratia sp.        | 0.0009   | 0.504219584 | -0.29738029       |
| 129 | 506   | WP_122289463.1 | phenylalanine--tRNA ligase subunit beta                                 | Serratia plymuthica | 0.00248  | 0.504554547 | -0.297091876      |
| 213 | 548   | WP_126527876.1 | ribonuclease E                                                          | Serratia plymuthica | 0.0116   | 0.508080271 | -0.294067669      |
| 55  | 89    | WP_119261052.1 | DNA topoisomerase (ATP-hydrolyzing) subunit B                           | Rahnella aquatilis  | 0.0003   | 0.510944048 | -0.291626656      |
| 60  | 37    | WP_002919219.1 | MULTISPECIES: DNA-directed RNA polymerase subunit alpha                 | Enterobacterales    | 0.00038  | 0.514073917 | -0.288974431      |
| 125 | 148   | WP_113877073.1 | aspartate ammonia-lyase                                                 | Rahnella aquatilis  | 0.00216  | 0.515686621 | -0.287614136      |
| 305 | 269   | WP_004951161.1 | MULTISPECIES: 50S ribosomal protein L14                                 | Serratia sp.        | 0.03458  | 0.517956656 | -0.285706582      |
| 268 | 440   | WP_004945505.1 | pyruvate kinase                                                         | Serratia plymuthica | 0.02026  | 0.519408293 | -0.284491121      |
| 101 | 199   | WP_004943793.1 | MULTISPECIES: glycine zipper 2TM domain-containing protein              | Serratia sp.        | 0.00128  | 0.521596152 | -0.282665621      |
| 145 | 287   | WP_015690190.1 | MULTISPECIES: acyl carrier protein                                      | Yersiniaceae        | 0.0042   | 0.522644471 | -0.281793639      |
| 311 | 703   | WP_004943598.1 | MULTISPECIES: phenylalanine--tRNA ligase subunit alpha                  | Serratia sp.        | 0.03682  | 0.526929851 | -0.278247197      |
| 243 | 187   | WP_004951135.1 | MULTISPECIES: 50S ribosomal protein L15                                 | Serratia sp.        | 0.01548  | 0.527006247 | -0.278184237      |
| 164 | 387   | WP_126484836.1 | 2,3,4,5-tetrahydropyridine-2,6-dicarboxylate N-succinyltransferase      | Serratia plymuthica | 0.00509  | 0.529296342 | -0.276301107      |
| 143 | 117   | WP_047607355.1 | serine hydroxymethyltransferase                                         | Rahnella aquatilis  | 0.00407  | 0.534246719 | -0.272258136      |
| 270 | 212   | WP_006323137.1 | MULTISPECIES: 50S ribosomal protein L7/L12                              | Serratia sp.        | 0.02043  | 0.534864269 | -0.271756414      |
| 215 | 343   | WP_004952787.1 | MULTISPECIES: inorganic diphosphatase                                   | Serratia sp.        | 0.01187  | 0.536129513 | -0.270730285      |



| Row | Index | Protein code   | Protein identification                                                                                          | Reference organism  | p-value | Fold Change | Log (Fold Change) |
|-----|-------|----------------|-----------------------------------------------------------------------------------------------------------------|---------------------|---------|-------------|-------------------|
| 167 | 291   | WP_047606852.1 | 3-deoxy-8-phosphooctulonate synthase                                                                            | Rahnella aquatilis  | 0.00528 | 0.537667363 | -0.269486325      |
| 183 | 45    | WP_013811522.1 | MULTISPECIES: phosphopyruvate hydratase                                                                         | Serratia sp.        | 0.00818 | 0.538947063 | -0.26845389       |
| 68  | 21    | WP_062791875.1 | MULTISPECIES: elongation factor Tu, partial                                                                     | Serratia sp.        | 0.00052 | 0.539219266 | -0.268234599      |
| 173 | 176   | WP_071823626.1 | MULTISPECIES: ribose-phosphate pyrophosphokinase                                                                | Rahnella sp.        | 0.00626 | 0.545575537 | -0.263145112      |
| 295 | 99    | WP_113878239.1 | MULTISPECIES: phosphoglycerate kinase                                                                           | Rahnella sp.        | 0.03059 | 0.545839251 | -0.262935237      |
| 70  | 270   | WP_004943595.1 | MULTISPECIES: 50S ribosomal protein L20                                                                         | Serratia sp.        | 0.00056 | 0.54774473  | -0.261421793      |
| 72  | 116   | WP_013573700.1 | MULTISPECIES: 30S ribosomal protein S5                                                                          | Yersiniaceae        | 0.00059 | 0.547920559 | -0.261282403      |
| 131 | 335   | WP_112287508.1 | MULTISPECIES: ATP-dependent protease ATP-binding subunit ClpX                                                   | Rahnella sp.        | 0.00277 | 0.548765261 | -0.260613389      |
| 285 | 495   | WP_062869945.1 | citrate synthase                                                                                                | Serratia plymuthica | 0.02643 | 0.550249061 | -0.25944069       |
| 160 | 676   | WP_015690312.1 | MULTISPECIES: protein translocase subunit SecD                                                                  | Rahnella sp.        | 0.00497 | 0.551412829 | -0.258523134      |
| 309 | 694   | WP_062868807.1 | DUF883 domain-containing protein                                                                                | Serratia plymuthica | 0.0359  | 0.552545184 | -0.257632202      |
| 266 | 660   | WP_037033577.1 | MULTISPECIES: transaldolase                                                                                     | Rahnella sp.        | 0.02001 | 0.554099452 | -0.256412279      |
| 246 | 681   | WP_086935265.1 | MULTISPECIES: 3-hydroxyacyl-ACP dehydratase FabZ                                                                | Rahnella sp.        | 0.01585 | 0.556938798 | -0.254192527      |
| 325 | 151   | WP_004952226.1 | MULTISPECIES: 30S ribosomal protein S2                                                                          | Serratia sp.        | 0.04262 | 0.558323238 | -0.253114296      |
| 223 | 734   | WP_095925051.1 | MULTISPECIES: bifunctional methylenetetrahydrofolate dehydrogenase/methenyltetrahydrofolate cyclohydrolase FOLD | Rahnella sp.        | 0.01249 | 0.559440643 | -0.252245986      |
| 171 | 11    | WP_013573670.1 | MULTISPECIES: elongation factor Tu                                                                              | Rahnella sp.        | 0.00609 | 0.560662376 | -0.251298587      |
| 45  | 558   | WP_126486035.1 | glycerol kinase GlpK                                                                                            | Serratia plymuthica | 0.00018 | 0.563671718 | -0.248973756      |
| 202 | 178   | WP_113877398.1 | CTP synthase (glutamine hydrolyzing)                                                                            | Rahnella aquatilis  | 0.01023 | 0.5649762   | -0.247969847      |
| 156 | 492   | WP_002210155.1 | MULTISPECIES: 30S ribosomal protein S18                                                                         | Enterobacterales    | 0.00478 | 0.566877055 | -0.246511121      |
| 228 | 729   | WP_113877923.1 | 3-deoxy-7-phosphoheptulonate synthase AroG                                                                      | Rahnella aquatilis  | 0.01295 | 0.566925395 | -0.246474089      |
| 161 | 677   | WP_013573791.1 | MULTISPECIES: inorganic diphosphatase                                                                           | Rahnella sp.        | 0.00499 | 0.567072466 | -0.246361439      |
| 136 | 454   | WP_064798761.1 | phosphomannomutase CpsG                                                                                         | Serratia plymuthica | 0.0034  | 0.568212802 | -0.245488985      |
| 77  | 453   | WP_126527389.1 | fumarate reductase (quinol) flavoprotein subunit                                                                | Serratia plymuthica | 0.00065 | 0.569304293 | -0.244655542      |
| 147 | 141   | WP_015699040.1 | 50S ribosomal protein L1                                                                                        | Rahnella aquatilis  | 0.0043  | 0.56979219  | -0.244283508      |
| 284 | 124   | WP_122289796.1 | DUF2974 domain-containing protein                                                                               | Serratia plymuthica | 0.02548 | 0.57004908  | -0.244087751      |
| 318 | 69    | WP_047609285.1 | NADP-dependent phosphogluconate dehydrogenase                                                                   | Rahnella aquatilis  | 0.03902 | 0.573815053 | -0.241228063      |
| 212 | 672   | WP_013574367.1 | MULTISPECIES: nucleoside-diphosphate kinase                                                                     | Yersiniaceae        | 0.01122 | 0.576171437 | -0.239448275      |
| 229 | 394   | WP_126528198.1 | outer membrane protein OmpW                                                                                     | Serratia plymuthica | 0.01303 | 0.578891158 | -0.237403084      |
| 276 | 82    | WP_113876357.1 | MULTISPECIES: pyruvate dehydrogenase complex dihydrolipoyllysine-residue acetyltransferase                      | Rahnella sp.        | 0.02328 | 0.581000916 | -0.235823183      |
| 175 | 646   | WP_004951171.1 | MULTISPECIES: 50S ribosomal protein L16                                                                         | Serratia sp.        | 0.00639 | 0.581323642 | -0.235582014      |
| 196 | 525   | WP_004953928.1 | MULTISPECIES: transcription termination/antitermination protein NusG                                            | Serratia sp.        | 0.00953 | 0.582461033 | -0.234733124      |
| 192 | 431   | WP_113876187.1 | MULTISPECIES: elongation factor 4                                                                               | Rahnella sp.        | 0.00915 | 0.582832537 | -0.234456212      |
| 292 | 154   | WP_063198834.1 | FOF1 ATP synthase subunit beta                                                                                  | Serratia plymuthica | 0.02959 | 0.582906271 | -0.234401273      |

| Row | Index | Protein code   | Protein identification                                      | Reference organism  | p-value | Fold Change | Log (Fold Change) |
|-----|-------|----------------|-------------------------------------------------------------|---------------------|---------|-------------|-------------------|
| 83  | 214   | WP_006317766.1 | argininosuccinate synthase                                  | Serratia plymuthica | 0.00087 | 0.583708657 | -0.233803866      |
| 197 | 310   | WP_065505698.1 | MULTISPECIES: thioredoxin TrxA                              | Serratia sp.        | 0.00981 | 0.584850459 | -0.232955165      |
| 30  | 61    | WP_004952224.1 | MULTISPECIES: elongation factor Ts                          | Serratia sp.        | 0.00012 | 0.586149741 | -0.231991423      |
| 207 | 25    | WP_013811127.1 | MULTISPECIES: DNA-directed RNA polymerase subunit beta'     | Serratia sp.        | 0.01084 | 0.587053255 | -0.2313225        |
| 204 | 405   | WP_013811241.1 | MULTISPECIES: protease modulator HflC                       | Serratia sp.        | 0.01045 | 0.591028883 | -0.228391295      |
| 190 | 496   | WP_119261854.1 | alpha-D-glucose phosphate-specific phosphoglucomutase       | Rahnella aquatilis  | 0.00902 | 0.592428065 | -0.227364376      |
| 316 | 55    | WP_113877112.1 | MULTISPECIES: polyribonucleotide nucleotidyltransferase     | Rahnella sp.        | 0.03799 | 0.595684042 | -0.224984034      |
| 109 | 18    | WP_015699039.1 | MULTISPECIES: DNA-directed RNA polymerase subunit beta      | Rahnella sp.        | 0.00156 | 0.596572799 | -0.224336553      |
| 81  | 439   | WP_013575324.1 | MULTISPECIES: septum site-determining protein MinD          | Rahnella sp.        | 0.00077 | 0.600882041 | -0.221210776      |
| 313 | 298   | WP_004942906.1 | MULTISPECIES: universal stress protein                      | Serratia sp.        | 0.03752 | 0.601092735 | -0.221058521      |
| 296 | 4     | WP_095924286.1 | MULTISPECIES: DNA-directed RNA polymerase subunit beta'     | Rahnella sp.        | 0.03075 | 0.604831856 | -0.218365343      |
| 330 | 544   | WP_126527912.1 | trans-2-enoyl-CoA reductase family protein                  | Serratia plymuthica | 0.04491 | 0.608022047 | -0.216080673      |
| 317 | 395   | WP_119261922.1 | glycine cleavage system aminomethyltransferase GcvT         | Rahnella aquatilis  | 0.03835 | 0.61036089  | -0.214413302      |
| 185 | 95    | WP_015698322.1 | MULTISPECIES: endopeptidase La                              | Rahnella sp.        | 0.00846 | 0.611209103 | -0.213810186      |
| 119 | 149   | WP_004951140.1 | MULTISPECIES: 30S ribosomal protein S5                      | Serratia sp.        | 0.00193 | 0.617386406 | -0.209442938      |
| 206 | 589   | WP_126483203.1 | glucose-6-phosphate dehydrogenase                           | Serratia plymuthica | 0.01073 | 0.618311167 | -0.20879291       |
| 307 | 108   | WP_004391423.1 | MULTISPECIES: 50S ribosomal protein L22                     | Enterobacterales    | 0.03556 | 0.618498095 | -0.208661634      |
| 39  | 616   | WP_113877630.1 | glycine C-acetyltransferase                                 | Rahnella aquatilis  | 0.00015 | 0.621651498 | -0.206453016      |
| 247 | 223   | WP_112286795.1 | MULTISPECIES: ATP-dependent zinc metalloprotease FtsH       | Rahnella sp.        | 0.016   | 0.623193039 | -0.205377406      |
| 211 | 60    | WP_063203045.1 | DNA-directed RNA polymerase subunit beta'                   | Serratia plymuthica | 0.01118 | 0.62759014  | -0.202323888      |
| 253 | 290   | WP_020837234.1 | MULTISPECIES: 50S ribosomal protein L18                     | Serratia sp.        | 0.01757 | 0.631488538 | -0.199634528      |
| 294 | 216   | WP_112289497.1 | MULTISPECIES: DNA topoisomerase (ATP-hydrolyzing) subunit A | Rahnella sp.        | 0.0299  | 0.634678288 | -0.197446358      |
| 193 | 62    | WP_013573691.1 | MULTISPECIES: 30S ribosomal protein S3                      | Rahnella sp.        | 0.00925 | 0.635566926 | -0.196838711      |
| 255 | 83    | WP_037431412.1 | phosphate acetyltransferase                                 | Serratia plymuthica | 0.01804 | 0.636137948 | -0.196448696      |
| 281 | 198   | WP_014333606.1 | MULTISPECIES: 30S ribosomal protein S4                      | Rahnella sp.        | 0.02447 | 0.641597931 | -0.192737045      |
| 293 | 687   | WP_073440429.1 | alpha-D-glucose phosphate-specific phosphoglucomutase       | Serratia plymuthica | 0.02985 | 0.642219415 | -0.192316569      |
| 236 | 86    | WP_004951125.1 | MULTISPECIES: 30S ribosomal protein S4                      | Serratia sp.        | 0.01409 | 0.642235936 | -0.192305398      |
| 275 | 584   | WP_121019733.1 | phosphomannomutase CpsG                                     | Rahnella aquatilis  | 0.02262 | 0.644760396 | -0.190601646      |
| 135 | 312   | WP_008457164.1 | MULTISPECIES: 50S ribosomal protein L14                     | Enterobacterales    | 0.00334 | 0.649753172 | -0.187251592      |
| 146 | 144   | WP_004951155.1 | MULTISPECIES: 50S ribosomal protein L5                      | Serratia sp.        | 0.00428 | 0.650922925 | -0.186470432      |
| 273 | 230   | WP_006323136.1 | MULTISPECIES: 50S ribosomal protein L10                     | Serratia sp.        | 0.02145 | 0.653638868 | -0.184662131      |
| 225 | 19    | WP_014333586.1 | elongation factor G                                         | Rahnella aquatilis  | 0.01265 | 0.65451755  | -0.184078704      |
| 94  | 143   | WP_013577536.1 | MULTISPECIES: transcription termination factor Rho          | Rahnella sp.        | 0.00106 | 0.659975087 | -0.180472458      |
| 217 | 696   | WP_004949671.1 | MULTISPECIES: glutamine--tRNA ligase                        | Serratia sp.        | 0.01203 | 0.663159877 | -0.178381758      |
| 272 | 253   | WP_015698881.1 | 30S ribosomal protein S9                                    | Rahnella aquatilis  | 0.02101 | 0.666256533 | -0.176358519      |
| 238 | 316   | WP_013577396.1 | MULTISPECIES: DNA-binding protein HU-alpha                  | Yersiniaceae        | 0.01448 | 1.576601763 | 0.197722008       |

| Row | Index | Protein code   | Protein identification                                                    | Reference organism  | p-value  | Fold Change | Log (Fold Change) |
|-----|-------|----------------|---------------------------------------------------------------------------|---------------------|----------|-------------|-------------------|
| 339 | 135   | WP_122288872.1 | S9 family peptidase                                                       | Serratia plymuthica | 0.04872  | 1.720951053 | 0.235768518       |
| 181 | 418   | WP_126124940.1 | iron uptake system protein EfeO                                           | Rahnella aquatilis  | 0.00779  | 1.722714371 | 0.236213277       |
| 227 | 689   | WP_015697849.1 | carboxy terminal-processing peptidase                                     | Rahnella aquatilis  | 0.01291  | 1.776202002 | 0.249492355       |
| 258 | 329   | WP_004949394.1 | MULTISPECIES: bifunctional UDP-sugar hydrolase/5'-nucleotidase            | Serratia sp.        | 0.01846  | 1.791971144 | 0.253331012       |
| 201 | 524   | WP_006317468.1 | MULTISPECIES: peptidyl-prolyl cis-trans isomerase                         | Serratia sp.        | 0.01011  | 1.795750268 | 0.25424594        |
| 298 | 367   | WP_006322224.1 | hypothetical protein                                                      | Serratia plymuthica | 0.03177  | 1.806914556 | 0.256937616       |
| 24  | 101   | WP_122288887.1 | serine endoprotease DegQ                                                  | Serratia plymuthica | 9.61E-05 | 1.810642603 | 0.257832735       |
| 331 | 417   | WP_126529065.1 | ribose ABC transporter substrate-binding protein RbsB                     | Serratia plymuthica | 0.04493  | 1.830177826 | 0.262493289       |
| 329 | 362   | WP_126481301.1 | glutamine ABC transporter substrate-binding protein GlnH                  | Serratia plymuthica | 0.04409  | 1.862063189 | 0.269994415       |
| 241 | 12    | WP_006324584.1 | porin OmpA                                                                | Serratia plymuthica | 0.01512  | 1.864457737 | 0.270552543       |
| 242 | 542   | WP_126482196.1 | nucleoside-specific channel-forming protein Tsx                           | Serratia plymuthica | 0.01518  | 1.889072948 | 0.276248729       |
| 138 | 114   | WP_126485974.1 | ketol-acid reductoisomerase                                               | Serratia plymuthica | 0.00355  | 1.88983737  | 0.276424433       |
| 314 | 522   | WP_065506637.1 | MULTISPECIES: divisome-associated lipoprotein YraP                        | Serratia sp.        | 0.03755  | 1.914822763 | 0.282128582       |
| 132 | 814   | WP_126480896.1 | glucosamine-6-phosphate deaminase                                         | Serratia plymuthica | 0.00305  | 1.950842602 | 0.290222231       |
| 155 | 58    | WP_122288888.1 | penicillin-binding protein activator                                      | Serratia plymuthica | 0.00472  | 1.955365293 | 0.291227902       |
| 124 | 133   | WP_015696692.1 | porin OmpA                                                                | Rahnella aquatilis  | 0.00216  | 1.975045692 | 0.295577147       |
| 67  | 145   | WP_073439860.1 | carboxy terminal-processing peptidase                                     | Serratia plymuthica | 0.00048  | 2.015027992 | 0.304281083       |
| 133 | 297   | WP_062791335.1 | murein hydrolase activator NlpD                                           | Serratia plymuthica | 0.0032   | 2.205477714 | 0.343502674       |
| 290 | 714   | WP_126484642.1 | two-component system QseEF-associated lipoprotein QseG                    | Serratia plymuthica | 0.02891  | 2.284952298 | 0.358877138       |
| 282 | 532   | WP_112291485.1 | MULTISPECIES: nucleoside-specific channel-forming protein Tsx             | Rahnella sp.        | 0.025    | 2.324300774 | 0.366292327       |
| 260 | 106   | WP_004942247.1 | MULTISPECIES: outer membrane protein OmpX                                 | Serratia sp.        | 0.01852  | 2.357094868 | 0.372377062       |
| 53  | 140   | WP_013811470.1 | MULTISPECIES: peptidylprolyl isomerase SurA                               | Serratia sp.        | 0.00027  | 2.380199184 | 0.376613302       |
| 71  | 38    | WP_006326771.1 | porin OmpC                                                                | Serratia plymuthica | 0.00059  | 2.380979938 | 0.376755736       |
| 232 | 256   | WP_006328507.1 | MULTISPECIES: peptidylprolyl isomerase A                                  | Serratia sp.        | 0.01391  | 2.429083703 | 0.38544248        |
| 203 | 207   | WP_004952521.1 | MULTISPECIES: oxidative stress defense protein                            | Serratia sp.        | 0.01045  | 2.530742803 | 0.40324801        |
| 248 | 64    | WP_006323248.1 | bifunctional 2',3'-cyclic-nucleotide 2'-phosphodiesterase/3'-nucleotidase | Serratia plymuthica | 0.01604  | 2.543382296 | 0.405411644       |
| 257 | 97    | WP_004950859.1 | MULTISPECIES: insulinase family protein                                   | Serratia sp.        | 0.01845  | 2.641644195 | 0.421874322       |
| 208 | 193   | WP_122288956.1 | L,D-transpeptidase family protein                                         | Serratia plymuthica | 0.01098  | 2.698326481 | 0.431094496       |
| 304 | 311   | WP_004942530.1 | MULTISPECIES: arginine ABC transporter substrate-binding protein          | Serratia sp.        | 0.03381  | 2.716006908 | 0.43393087        |
| 327 | 718   | WP_113877411.1 | MULTISPECIES: murein hydrolase activator NlpD                             | Rahnella sp.        | 0.04345  | 2.76662515  | 0.441950321       |
| 172 | 768   | WP_004950614.1 | MULTISPECIES: OmpA family lipoprotein                                     | Serratia sp.        | 0.00615  | 2.780940359 | 0.444191675       |
| 251 | 649   | WP_013577556.1 | MULTISPECIES: ABC transporter substrate-binding protein                   | Rahnella sp.        | 0.01703  | 2.85280164  | 0.455271575       |
| 65  | 664   | WP_073440218.1 | thioredoxin domain-containing protein                                     | Serratia plymuthica | 0.00043  | 2.907251454 | 0.463482596       |
| 187 | 597   | WP_112290844.1 | MULTISPECIES: ribose ABC transporter substrate-binding protein RbsB       | Rahnella sp.        | 0.00848  | 2.922095685 | 0.465694433       |

| Row | Index | Protein code   | Protein identification                                                     | Reference organism  | p-value  | Fold Change | Log (Fold Change) |
|-----|-------|----------------|----------------------------------------------------------------------------|---------------------|----------|-------------|-------------------|
| 113 | 189   | WP_006323429.1 | MULTISPECIES: L,D-transpeptidase family protein                            | Serratia sp.        | 0.00171  | 2.984388967 | 0.474855426       |
| 112 | 257   | WP_013576150.1 | MULTISPECIES: carboxy terminal-processing peptidase                        | Rahnella sp.        | 0.00162  | 3.057842469 | 0.485415108       |
| 214 | 183   | WP_063201108.1 | oligopeptide ABC transporter substrate-binding protein OppA                | Serratia plymuthica | 0.01169  | 3.185314922 | 0.503152376       |
| 151 | 534   | WP_062868083.1 | porin                                                                      | Serratia plymuthica | 0.00452  | 3.206291528 | 0.506003007       |
| 102 | 652   | WP_126528657.1 | YgdI/YgdR family lipoprotein                                               | Serratia plymuthica | 0.00128  | 3.231149266 | 0.509357021       |
| 224 | 678   | WP_062870112.1 | ABC transporter substrate-binding protein                                  | Serratia plymuthica | 0.01264  | 3.296664992 | 0.518074816       |
| 114 | 604   | WP_004942697.1 | MULTISPECIES: L,D-transpeptidase                                           | Serratia sp.        | 0.00177  | 3.340162566 | 0.523767604       |
| 126 | 389   | WP_073440018.1 | beta-glucosidase BglX                                                      | Serratia plymuthica | 0.00219  | 3.509310594 | 0.545221807       |
| 42  | 6     | WP_063200275.1 | pitrilysin                                                                 | Serratia plymuthica | 0.00017  | 3.550336361 | 0.5502695         |
| 63  | 202   | WP_065505781.1 | MULTISPECIES: polyribonucleotide nucleotidyltransferase                    | Serratia sp.        | 0.00039  | 3.568289591 | 0.552460093       |
| 308 | 741   | WP_126484412.1 | transaldolase                                                              | Serratia plymuthica | 0.03589  | 3.59308685  | 0.555467715       |
| 22  | 174   | WP_122289663.1 | thiol:disulfide interchange protein DsbA                                   | Serratia plymuthica | 9.27E-05 | 3.80273492  | 0.580096053       |
| 263 | 488   | RMN17366.1     | hypothetical protein ALQ63_02794                                           | Serratia plymuthica | 0.01893  | 4.057867722 | 0.608297886       |
| 148 | 46    | WP_126527496.1 | serine endoprotease DegP                                                   | Serratia plymuthica | 0.0044   | 4.06061716  | 0.608592046       |
| 111 | 162   | WP_063199821.1 | serine protease inhibitor ecotin                                           | Serratia plymuthica | 0.00158  | 4.072858357 | 0.609899307       |
| 14  | 50    | WP_047607744.1 | cystine ABC transporter substrate-binding protein                          | Rahnella aquatilis  | 5.35E-05 | 4.128761639 | 0.615819811       |
| 184 | 391   | WP_119262138.1 | Do family serine endopeptidase                                             | Rahnella aquatilis  | 0.0083   | 4.186826049 | 0.621884917       |
| 75  | 49    | WP_004949773.1 | MULTISPECIES: Tol-Pal system protein TolB                                  | Serratia sp.        | 0.00063  | 4.191728086 | 0.622393103       |
| 33  | 385   | WP_004949986.1 | protein CreA                                                               | Serratia plymuthica | 0.00013  | 4.191848586 | 0.622405587       |
| 74  | 110   | WP_006328854.1 | sulfate ABC transporter substrate-binding protein                          | Serratia plymuthica | 0.00061  | 4.200643876 | 0.623315864       |
| 104 | 243   | WP_047609790.1 | murein transglycosylase                                                    | Rahnella aquatilis  | 0.00143  | 4.243471768 | 0.627721317       |
| 27  | 54    | WP_015698105.1 | Tol-Pal system protein TolB                                                | Rahnella aquatilis  | 0.0001   | 4.302778428 | 0.633748983       |
| 226 | 612   | WP_047612859.1 | pitrilysin                                                                 | Rahnella aquatilis  | 0.01278  | 4.37373876  | 0.640852839       |
| 37  | 226   | WP_063201917.1 | cystine ABC transporter substrate-binding protein                          | Serratia plymuthica | 0.00015  | 4.424907603 | 0.645904207       |
| 123 | 5     | WP_086016609.1 | MULTISPECIES: glucans biosynthesis protein MdoG                            | Serratia sp.        | 0.00212  | 4.432558925 | 0.646654518       |
| 280 | 839   | WP_013813653.1 | MULTISPECIES: ATP-grasp domain-containing protein                          | Serratia sp.        | 0.0241   | 4.459216611 | 0.649258569       |
| 105 | 210   | WP_047612656.1 | translation initiation factor IF-2                                         | Rahnella aquatilis  | 0.00148  | 4.647907673 | 0.667257493       |
| 54  | 282   | WP_065505971.1 | MULTISPECIES: cell division protein CpoB                                   | Serratia sp.        | 0.00029  | 4.684299104 | 0.670644618       |
| 76  | 244   | WP_004952410.1 | MULTISPECIES: bifunctional protein-disulfide isomerase/oxidoreductase DsbC | Serratia sp.        | 0.00063  | 4.728756285 | 0.674746932       |
| 10  | 632   | WP_131638597.1 | phospholipid-binding protein MlaC                                          | Rahnella aquatilis  | 3.32E-05 | 4.738399328 | 0.675631658       |
| 115 | 211   | WP_112289187.1 | MULTISPECIES: Tol-Pal system protein TolB                                  | Rahnella sp.        | 0.00179  | 4.77021637  | 0.678538078       |
| 152 | 483   | WP_113877622.1 | MULTISPECIES: sulfate ABC transporter substrate-binding protein            | Rahnella sp.        | 0.00455  | 4.867403359 | 0.687297337       |
| 100 | 3     | WP_063198645.1 | murein transglycosylase                                                    | Serratia plymuthica | 0.00123  | 4.984050244 | 0.697582412       |
| 17  | 104   | WP_004944994.1 | DUF1471 domain-containing protein                                          | Serratia plymuthica | 6.18E-05 | 5.046065988 | 0.702952926       |
| 19  | 675   | WP_073440332.1 | glutathione ABC transporter substrate-binding protein GsiB                 | Serratia plymuthica | 7.60E-05 | 5.071734469 | 0.705156508       |

| Row | Index | Protein code   | Protein identification                                                                 | Reference organism  | p-value  | Fold Change | Log (Fold Change) |
|-----|-------|----------------|----------------------------------------------------------------------------------------|---------------------|----------|-------------|-------------------|
| 40  | 721   | WP_126480972.1 | Tol-Pal system protein TolB                                                            | Serratia plymuthica | 0.00015  | 5.221408901 | 0.717787705       |
| 50  | 356   | WP_004952213.1 | MULTISPECIES: molecular chaperone Skp                                                  | Serratia sp.        | 0.00025  | 5.449391379 | 0.736348          |
| 43  | 250   | WP_004942614.1 | MULTISPECIES: outer membrane lipoprotein chaperone LolA                                | Serratia sp.        | 0.00018  | 5.505599761 | 0.740804636       |
| 265 | 283   | WP_113878243.1 | MULTISPECIES: oxidative stress defense protein                                         | Rahnella sp.        | 0.01965  | 5.622030046 | 0.749893162       |
| 7   | 142   | WP_062790903.1 | MULTISPECIES: ABC transporter substrate-binding protein                                | Serratia sp.        | 1.79E-05 | 5.869243593 | 0.768582135       |
| 96  | 551   | WP_126486390.1 | zinc ABC transporter substrate-binding protein ZnuA                                    | Serratia plymuthica | 0.00113  | 5.890530507 | 0.77015441        |
| 58  | 442   | WP_112289283.1 | MULTISPECIES: thiol:disulfide interchange protein DsbA                                 | Rahnella sp.        | 0.00033  | 6.308634418 | 0.799935361       |
| 122 | 289   | WP_013573626.1 | MULTISPECIES: peptidylprolyl isomerase A                                               | Rahnella sp.        | 0.00207  | 6.454504701 | 0.809862921       |
| 64  | 433   | WP_006321789.1 | MULTISPECIES: phosphate ABC transporter substrate-binding protein PstS                 | Serratia sp.        | 0.00043  | 6.63285313  | 0.821700381       |
| 34  | 445   | WP_006324721.1 | MULTISPECIES: penicillin-binding protein activator LpoB                                | Serratia sp.        | 0.00013  | 6.794495274 | 0.832157201       |
| 137 | 380   | WP_112287456.1 | MULTISPECIES: ABC transporter substrate-binding protein                                | Rahnella sp.        | 0.00352  | 7.020911855 | 0.846393521       |
| 121 | 674   | WP_064798698.1 | 3',5'-cyclic-nucleotide phosphodiesterase                                              | Serratia plymuthica | 0.00203  | 7.332126731 | 0.865229963       |
| 26  | 167   | WP_126486177.1 | ABC transporter substrate-binding protein                                              | Serratia plymuthica | 9.96E-05 | 7.341655103 | 0.865793978       |
| 59  | 76    | WP_013814237.1 | MULTISPECIES: glycine betaine/L-proline ABC transporter substrate-binding protein ProX | Serratia sp.        | 0.00034  | 7.507339623 | 0.875486063       |
| 20  | 71    | WP_004950512.1 | MULTISPECIES: ABC transporter substrate-binding protein                                | Serratia sp.        | 8.50E-05 | 7.624817875 | 0.882229475       |
| 93  | 36    | WP_063203173.1 | FKBP-type peptidyl-prolyl cis-trans isomerase                                          | Serratia plymuthica | 0.00105  | 7.944312129 | 0.900056299       |
| 15  | 201   | WP_112290698.1 | MULTISPECIES: sulfate ABC transporter substrate-binding protein                        | Rahnella sp.        | 5.52E-05 | 8.337536155 | 0.92103773        |
| 4   | 419   | WP_110605874.1 | glucans biosynthesis protein MdoG                                                      | Serratia plymuthica | 7.48E-06 | 9.325084299 | 0.969652767       |
| 1   | 225   | WP_062869220.1 | glycerophosphodiester phosphodiesterase                                                | Serratia plymuthica | 9.82E-07 | 9.579085515 | 0.98132405        |
| 5   | 73    | WP_015697963.1 | glucan biosynthesis protein G                                                          | Rahnella aquatilis  | 1.50E-05 | 9.940460565 | 0.997406507       |
| 49  | 39    | WP_113877246.1 | FKBP-type peptidyl-prolyl cis-trans isomerase                                          | Rahnella aquatilis  | 0.00025  | 10.51864281 | 1.021959708       |
| 85  | 485   | WP_121020019.1 | MULTISPECIES: insulinase family protein                                                | Rahnella sp.        | 0.00088  | 11.42080863 | 1.057696855       |
| 13  | 371   | WP_004943016.1 | MULTISPECIES: Ycel family protein                                                      | Serratia sp.        | 5.17E-05 | 12.49223956 | 1.096640304       |
| 21  | 384   | WP_126485701.1 | FKBP-type peptidyl-prolyl cis-trans isomerase                                          | Serratia plymuthica | 8.70E-05 | 13.34956587 | 1.125467143       |
| 29  | 759   | WP_126484392.1 | YgiW/YdeI family stress tolerance OB fold protein                                      | Serratia plymuthica | 0.00011  | 13.38550567 | 1.126634782       |
| 6   | 497   | RMN19543.1     | hypothetical protein ALQ63_00888                                                       | Serratia plymuthica | 1.70E-05 | 14.66443248 | 1.16626526        |
| 12  | 300   | WP_113876396.1 | MULTISPECIES: serine endoprotease DegP                                                 | Rahnella sp.        | 4.57E-05 | 16.69979518 | 1.222711145       |
| 51  | 583   | WP_112289032.1 | MULTISPECIES: molecular chaperone OsmY                                                 | Rahnella sp.        | 0.00026  | 17.38745721 | 1.240236074       |
| 48  | 213   | WP_013575568.1 | MULTISPECIES: DUF1471 domain-containing protein                                        | Rahnella sp.        | 0.00024  | 22.07861059 | 1.34397174        |
| 97  | 315   | WP_113877533.1 | glycine betaine/L-proline ABC transporter substrate-binding protein ProX               | Rahnella aquatilis  | 0.00116  | 25.29775174 | 1.403081926       |



**Table S4.** Differential expression of proteins in Sp2 (*Serratia plymuthica*) treated with 0.4% NaCl vs Control.

| Row | Index | Protein code   | Protein identification                                                  | Reference organism      | p-value  | Fold Change | Log (Fold Change) |
|-----|-------|----------------|-------------------------------------------------------------------------|-------------------------|----------|-------------|-------------------|
| 224 | 169   | WP_113877445.1 | FlhC/FlhB family flagellin                                              | Rahnella aquatilis      | 0.00978  | 0.00241122  | -2.617763184      |
| 45  | 1     | WP_004945950.1 | FlhC/FlhB family flagellin                                              | Serratia plymuthica     | 0.0002   | 0.003444712 | -2.462847032      |
| 18  | 588   | WP_013575778.1 | MULTISPECIES: FlhC/FlhB family flagellin                                | Rahnella sp.            | 5.13E-05 | 0.003530602 | -2.452151194      |
| 48  | 376   | WP_020439242.1 | MULTISPECIES: FlhC/FlhB family flagellin                                | Serratia sp.            | 0.00024  | 0.004886339 | -2.311016406      |
| 62  | 7     | WP_004945953.1 | MULTISPECIES: flagellar filament capping protein FlhD                   | Serratia sp.            | 0.00033  | 0.008367229 | -2.077418336      |
| 56  | 51    | WP_004946072.1 | MULTISPECIES: flagellar hook-filament junction protein FlgL             | Serratia sp.            | 0.0003   | 0.009732362 | -2.011781767      |
| 3   | 17    | WP_122288670.1 | flagellar hook-associated protein FlgK                                  | Serratia plymuthica     | 2.41E-07 | 0.020905445 | -1.679740587      |
| 200 | 550   | WP_004946081.1 | MULTISPECIES: flagellar basal-body rod protein FlgG                     | Serratia sp.            | 0.00613  | 0.026367569 | -1.578929913      |
| 1   | 402   | WP_073439293.1 | flagellar hook assembly protein FlgD                                    | Serratia plymuthica     | 3.46E-09 | 0.029276202 | -1.533485262      |
| 146 | 124   | WP_122289796.1 | DUF2974 domain-containing protein                                       | Serratia plymuthica     | 0.00242  | 0.04704924  | -1.327447392      |
| 265 | 747   | WP_037432192.1 | phage major tail tube protein                                           | Serratia plymuthica     | 0.01949  | 0.049618339 | -1.304357778      |
| 183 | 139   | WP_006323695.1 | MULTISPECIES: phage major tail tube protein                             | Serratia sp.            | 0.00461  | 0.060931609 | -1.215157353      |
| 52  | 411   | WP_064798956.1 | flagellar basal body rod protein FlgF                                   | Serratia plymuthica     | 0.00028  | 0.062110821 | -1.20683273       |
| 11  | 111   | WP_013813492.1 | MULTISPECIES: flagellar hook protein FlgE                               | Serratia sp.            | 2.51E-05 | 0.065475037 | -1.183924248      |
| 32  | 357   | WP_013812357.1 | MULTISPECIES: DNA/RNA non-specific endonuclease                         | Serratia sp.            | 0.00012  | 0.065811467 | -1.181698429      |
| 75  | 326   | WP_047609302.1 | chemotaxis protein CheW                                                 | Rahnella aquatilis      | 0.00056  | 0.083574178 | -1.077927885      |
| 96  | 9     | WP_062869888.1 | hypothetical protein                                                    | Serratia plymuthica     | 0.0009   | 0.091187879 | -1.040062887      |
| 148 | 30    | AHY09490.1     | hemolysin                                                               | Serratia plymuthica     | 0.00256  | 0.093045916 | -1.031302685      |
| 141 | 134   | WP_063201803.1 | hypothetical protein                                                    | Serratia plymuthica     | 0.00231  | 0.10009042  | -0.999607487      |
| 12  | 480   | WP_037429949.1 | hypothetical protein                                                    | Serratia plymuthica     | 2.93E-05 | 0.111779023 | -0.95163969       |
| 285 | 354   | WP_063198800.1 | baseplate assembly protein                                              | Serratia plymuthica     | 0.02433  | 0.112257632 | -0.949784123      |
| 124 | 146   | WP_006317741.1 | MULTISPECIES: triose-phosphate isomerase                                | Serratia sp.            | 0.00175  | 0.11485185  | -0.939862005      |
| 197 | 158   | WP_122289835.1 | matrixin family metalloprotease                                         | Serratia plymuthica     | 0.00595  | 0.12427981  | -0.90559942       |
| 275 | 637   | WP_047606070.1 | alcohol dehydrogenase AdhP                                              | Rahnella aquatilis      | 0.02189  | 0.135028781 | -0.869573652      |
| 215 | 131   | AHY07005.1     | hypothetical protein sch_10780                                          | Serratia plymuthica     | 0.00772  | 0.136266714 | -0.865610216      |
| 345 | 725   | WP_004089944.1 | MULTISPECIES: integration host factor subunit alpha                     | Enterobacteriales       | 0.0488   | 0.144295566 | -0.840747014      |
| 49  | 466   | WP_112168192.1 | MULTISPECIES: two-component system response regulator ArcA              | Rahnella sp.            | 0.00024  | 0.145443237 | -0.837306467      |
| 290 | 618   | WP_006322046.1 | MULTISPECIES: elongation factor P                                       | Serratia sp.            | 0.02515  | 0.1605798   | -0.794309087      |
| 280 | 505   | WP_009639183.1 | MULTISPECIES: 50S ribosomal protein L16                                 | Yersiniaceae            | 0.02269  | 0.177241197 | -0.751435327      |
| 235 | 294   | WP_015699041.1 | 50S ribosomal protein L11                                               | Rahnella aquatilis      | 0.01201  | 0.191365385 | -0.718136617      |
| 153 | 557   | WP_065506613.1 | MULTISPECIES: formate dehydrogenase subunit alpha                       | Serratia sp.            | 0.0027   | 0.198060693 | -0.703201707      |
| 253 | 238   | WP_013577239.1 | MULTISPECIES: 50S ribosomal protein L13                                 | Yersiniaceae            | 0.01558  | 0.201275437 | -0.696209221      |
| 226 | 388   | WP_126480690.1 | endopeptidase La                                                        | Serratia plymuthica     | 0.01028  | 0.202981689 | -0.692543137      |
| 135 | 120   | WP_122288902.1 | matrixin family metalloprotease                                         | Serratia plymuthica     | 0.00204  | 0.218265373 | -0.661015159      |
| 121 | 314   | WP_004951488.1 | fimbrial protein                                                        | Serratia plymuthica     | 0.00169  | 0.219506808 | -0.658552005      |
| 261 | 365   | WP_015695926.1 | S-ribosylhomocysteine lyase                                             | Rahnella aquatilis      | 0.01908  | 0.229404286 | -0.639398471      |
| 328 | 475   | WP_126486128.1 | ribosome-dependent GTPase TypA                                          | Serratia plymuthica     | 0.04095  | 0.231086363 | -0.636225683      |
| 144 | 160   | WP_064798816.1 | aldehyde dehydrogenase                                                  | Serratia plymuthica     | 0.00238  | 0.235098295 | -0.628750521      |
| 147 | 194   | WP_073440881.1 | N-acetylmuramoyl-L-alanine amidase                                      | Serratia plymuthica     | 0.00252  | 0.235566654 | -0.627886186      |
| 98  | 254   | WP_122289004.1 | glycoside hydrolase family 68 protein                                   | Serratia plymuthica     | 0.0009   | 0.237941148 | -0.623530448      |
| 107 | 511   | WP_004950476.1 | MULTISPECIES: F0F1 ATP synthase subunit B                               | Serratia sp.            | 0.00119  | 0.247725278 | -0.606029676      |
| 317 | 378   | AGP46727.1     | hypothetical protein M621_02115                                         | Serratia plymuthica S13 | 0.03609  | 0.252529531 | -0.597687828      |
| 116 | 228   | WP_112286790.1 | MULTISPECIES: transcription termination/antitermination protein NusA    | Rahnella sp.            | 0.00153  | 0.26019989  | -0.584692891      |
| 171 | 136   | WP_126480368.1 | recombinase RecA                                                        | Serratia plymuthica     | 0.00361  | 0.284331906 | -0.546174404      |
| 302 | 399   | WP_004946879.1 | MULTISPECIES: DUF1440 domain-containing protein                         | Serratia sp.            | 0.02949  | 0.290132674 | -0.537403359      |
| 287 | 302   | WP_015698930.1 | acetyl-CoA carboxylase biotin carboxylase subunit                       | Rahnella aquatilis      | 0.02442  | 0.299188717 | -0.524054788      |
| 320 | 613   | WP_112288147.1 | MULTISPECIES: peptide deformylase                                       | Rahnella sp.            | 0.03778  | 0.300969088 | -0.521478108      |
| 223 | 152   | WP_112291457.1 | MULTISPECIES: recombinase RecA                                          | Rahnella sp.            | 0.00964  | 0.326115255 | -0.486628886      |
| 157 | 258   | WP_013577593.1 | MULTISPECIES: triose-phosphate isomerase                                | Rahnella sp.            | 0.00299  | 0.332597975 | -0.4780804        |
| 100 | 22    | WP_015697077.1 | bifunctional acetaldehyde-CoA/alcohol dehydrogenase                     | Rahnella aquatilis      | 0.00099  | 0.334522542 | -0.475574612      |
| 331 | 666   | WP_073439042.1 | NADH:flavin oxidoreductase/NADH oxidase                                 | Serratia plymuthica     | 0.04115  | 0.335248769 | -0.474632808      |
| 191 | 268   | WP_013576134.1 | MULTISPECIES: 50S ribosomal protein L20                                 | Yersiniaceae            | 0.00525  | 0.341302198 | -0.466860915      |
| 321 | 816   | WP_126483270.1 | PTS mannose transporter subunit IIB                                     | Serratia plymuthica     | 0.03784  | 0.345069812 | -0.462093033      |
| 73  | 16    | WP_014333640.1 | chaperonin GroEL                                                        | Rahnella aquatilis      | 0.00053  | 0.357707669 | -0.446471749      |
| 272 | 179   | WP_004953623.1 | MULTISPECIES: autonomous glycyl radical cofactor GrcA                   | Serratia sp.            | 0.02119  | 0.36487024  | -0.437861558      |
| 256 | 726   | WP_004933536.1 | MULTISPECIES: ribosome assembly RNA-binding protein YhbY                | Enterobacteriales       | 0.01697  | 0.365652809 | -0.436931086      |
| 279 | 113   | WP_013575313.1 | MULTISPECIES: pyruvate kinase                                           | Rahnella sp.            | 0.02253  | 0.369361107 | -0.432548836      |
| 281 | 218   | WP_065506321.1 | MULTISPECIES: pyruvate kinase                                           | Serratia sp.            | 0.02282  | 0.375183868 | -0.425755844      |
| 293 | 324   | WP_112288177.1 | MULTISPECIES: autonomous glycyl radical cofactor GrcA                   | Rahnella sp.            | 0.02612  | 0.376311873 | -0.424452079      |
| 301 | 838   | WP_126527624.1 | lipoyl synthase                                                         | Serratia plymuthica     | 0.0291   | 0.391449431 | -0.407324334      |
| 239 | 11    | WP_013573670.1 | MULTISPECIES: elongation factor Tu                                      | Rahnella sp.            | 0.01222  | 0.409129155 | -0.388139571      |
| 324 | 92    | WP_005969574.1 | MULTISPECIES: 30S ribosomal protein S7                                  | Enterobacteriales       | 0.0401   | 0.413468025 | -0.38355807       |
| 335 | 770   | WP_126527646.1 | 3-deoxy-7-phosphoheptulonate synthase AroG                              | Serratia plymuthica     | 0.04418  | 0.420734973 | -0.375991387      |
| 22  | 416   | WP_004951154.1 | MULTISPECIES: 30S ribosomal protein S14                                 | Serratia sp.            | 5.78E-05 | 0.422454365 | -0.374220199      |
| 50  | 590   | WP_056772785.1 | MULTISPECIES: 30S ribosomal protein S16                                 | Yersiniaceae            | 0.00025  | 0.430438101 | -0.366089294      |
| 168 | 13    | WP_006325792.1 | bifunctional acetaldehyde-CoA/alcohol dehydrogenase                     | Serratia plymuthica     | 0.00341  | 0.435495093 | -0.361016734      |
| 211 | 2     | WP_013574828.1 | MULTISPECIES: formate C-acetyltransferase                               | Rahnella sp.            | 0.0075   | 0.435656497 | -0.360855805      |
| 286 | 10    | WP_006324547.1 | MULTISPECIES: formate C-acetyltransferase                               | Serratia sp.            | 0.02436  | 0.435750854 | -0.360761753      |
| 154 | 738   | WP_004093983.1 | MULTISPECIES: 50S ribosomal protein L34                                 | Enterobacteriales       | 0.00275  | 0.435777745 | -0.360734953      |
| 299 | 147   | WP_112289290.1 | MULTISPECIES: ribosome-dependent GTPase TypA                            | Rahnella sp.            | 0.02766  | 0.452316076 | -0.344557977      |
| 242 | 742   | WP_065505783.1 | MULTISPECIES: DEAD/DEAH family ATP-dependent RNA helicase               | Serratia sp.            | 0.0135   | 0.453124235 | -0.34378271       |
| 93  | 657   | WP_004932501.1 | MULTISPECIES: 30S ribosomal protein S16                                 | Enterobacteriales       | 0.00086  | 0.455302688 | -0.341699786      |
| 88  | 636   | WP_004951128.1 | MULTISPECIES: 30S ribosomal protein S11                                 | Serratia sp.            | 0.00073  | 0.45951402  | -0.337701233      |
| 133 | 185   | WP_112290710.1 | MULTISPECIES: cysteine synthase A                                       | Rahnella sp.            | 0.00197  | 0.463173626 | -0.334256178      |
| 260 | 98    | WP_126527385.1 | aspartate ammonia-lyase                                                 | Serratia plymuthica     | 0.01823  | 0.478213344 | -0.320378309      |
| 244 | 265   | WP_001144069.1 | MULTISPECIES: 30S ribosomal protein S21                                 | Bacteria                | 0.0136   | 0.479039876 | -0.319628334      |
| 26  | 198   | WP_014333606.1 | MULTISPECIES: 30S ribosomal protein S4                                  | Rahnella sp.            | 8.11E-05 | 0.485097738 | -0.31417075       |
| 109 | 155   | WP_013573668.1 | MULTISPECIES: 30S ribosomal protein S12                                 | Yersiniaceae            | 0.00122  | 0.494010779 | -0.306263575      |
| 307 | 431   | WP_113876187.1 | MULTISPECIES: elongation factor 4                                       | Rahnella sp.            | 0.03249  | 0.494230936 | -0.306070074      |
| 254 | 844   | WP_013814788.1 | MULTISPECIES: large-conductance mechanosensitive channel protein MscL   | Serratia sp.            | 0.01604  | 0.496722798 | -0.303885907      |
| 243 | 53    | WP_004951177.1 | MULTISPECIES: 50S ribosomal protein L2                                  | Serratia sp.            | 0.0136   | 0.500888256 | -0.300259151      |
| 65  | 248   | WP_004950372.1 | MULTISPECIES: 50S ribosomal protein L19                                 | Serratia sp.            | 0.00045  | 0.510015314 | -0.292416783      |
| 219 | 224   | WP_002221949.1 | MULTISPECIES: transcription antiterminator/RNA stability regulator CspE | Enterobacteriales       | 0.00887  | 0.512553155 | -0.290261089      |
| 176 | 292   | WP_062870646.1 | pyruvate kinase PvkF                                                    | Serratia plymuthica     | 0.00411  | 0.513067446 | -0.28982554       |
| 203 | 90    | WP_112288137.1 | MULTISPECIES: 50S ribosomal protein L2                                  | Rahnella sp.            | 0.00641  | 0.513592986 | -0.289380916      |
| 199 | 441   | WP_004947686.1 | MULTISPECIES: PTS glucose transporter subunit IIA                       | Serratia sp.            | 0.00605  | 0.519228228 | -0.284641705      |

| Row | Index | Protein code   | Protein identification                                                                     | Reference organism  | p-value | Fold Change | Log (Fold Change) |
|-----|-------|----------------|--------------------------------------------------------------------------------------------|---------------------|---------|-------------|-------------------|
| 232 | 86    | WP_004951125.1 | MULTISPECIES: 30S ribosomal protein S4                                                     | Serratia sp.        | 0.01152 | 0.520862765 | -0.283276688      |
| 259 | 48    | WP_112290864.1 | MULTISPECIES: glutamine-fructose-6-phosphate transaminase (isomerizing)                    | Rahnella sp.        | 0.0182  | 0.527335207 | -0.277913232      |
| 131 | 116   | WP_013573700.1 | MULTISPECIES: 30S ribosomal protein S5                                                     | Yersiniaceae        | 0.00189 | 0.5300413   | -0.275690289      |
| 137 | 591   | WP_047612676.1 | alpha, alpha-phosphotrehalase                                                              | Rahnella aquatilis  | 0.0022  | 0.531639174 | -0.274383025      |
| 274 | 707   | WP_013575246.1 | MULTISPECIES: transcription antiterminator/RNA stability regulator CspE                    | Yersiniaceae        | 0.02143 | 0.535331654 | -0.271377077      |
| 229 | 151   | WP_004952226.1 | MULTISPECIES: 30S ribosomal protein S2                                                     | Serratia sp.        | 0.01103 | 0.539599949 | -0.2679281        |
| 312 | 270   | WP_004943595.1 | MULTISPECIES: 50S ribosomal protein L20                                                    | Serratia sp.        | 0.0334  | 0.546193906 | -0.26265315       |
| 145 | 343   | WP_004952787.1 | MULTISPECIES: inorganic diphosphatase                                                      | Serratia sp.        | 0.0024  | 0.547551599 | -0.261574949      |
| 295 | 607   | WP_004951166.1 | MULTISPECIES: 30S ribosomal protein S17                                                    | Serratia sp.        | 0.02647 | 0.548173316 | -0.261082109      |
| 263 | 190   | WP_120978375.1 | type 1 fimbrial protein                                                                    | Serratia plymuthica | 0.01945 | 0.551576059 | -0.258394592      |
| 291 | 82    | WP_113876357.1 | MULTISPECIES: pyruvate dehydrogenase complex dihydrolipoyllysine-residue acetyltransferase | Rahnella sp.        | 0.02544 | 0.557571273 | -0.25369961       |
| 326 | 785   | WP_126482255.1 | RNA chaperone ProQ                                                                         | Serratia plymuthica | 0.04067 | 0.559676654 | -0.252062809      |
| 267 | 672   | WP_013574367.1 | MULTISPECIES: nucleoside-diphosphate kinase                                                | Yersiniaceae        | 0.0203  | 0.56831625  | -0.245409926      |
| 158 | 677   | WP_013573791.1 | MULTISPECIES: inorganic diphosphatase                                                      | Rahnella sp.        | 0.00303 | 0.569952637 | -0.244161233      |
| 247 | 231   | WP_126527311.1 | superoxide dismutase [Mn]                                                                  | Serratia plymuthica | 0.01475 | 0.578802516 | -0.23746959       |
| 255 | 472   | WP_004931195.1 | MULTISPECIES: 50S ribosomal protein L28                                                    | Enterobacterales    | 0.01653 | 0.579434975 | -0.236995294      |
| 89  | 27    | WP_015695890.1 | phosphopyruvate hydratase                                                                  | Rahnella aquatilis  | 0.00079 | 0.582193825 | -0.234932405      |
| 251 | 26    | WP_095924049.1 | MULTISPECIES: FOF1 ATP synthase subunit beta                                               | Rahnella sp.        | 0.01519 | 0.587528554 | -0.230971022      |
| 59  | 20    | WP_004950026.1 | MULTISPECIES: molecular chaperone DnaK                                                     | Serratia sp.        | 0.00031 | 0.587796453 | -0.230773039      |
| 225 | 492   | WP_002210155.1 | MULTISPECIES: 30S ribosomal protein S18                                                    | Enterobacterales    | 0.00991 | 0.590077149 | -0.229091203      |
| 190 | 28    | WP_013577682.1 | MULTISPECIES: FOF1 ATP synthase subunit alpha                                              | Rahnella sp.        | 0.00518 | 0.591902256 | -0.227750005      |
| 248 | 37    | WP_002919219.1 | MULTISPECIES: DNA-directed RNA polymerase subunit alpha                                    | Enterobacterales    | 0.01493 | 0.598595783 | -0.222866347      |
| 343 | 149   | WP_004951140.1 | MULTISPECIES: 30S ribosomal protein S5                                                     | Serratia sp.        | 0.04727 | 0.603686983 | -0.219188188      |
| 230 | 253   | WP_015698881.1 | 30S ribosomal protein S9                                                                   | Rahnella aquatilis  | 0.01104 | 0.606680177 | -0.217040195      |
| 167 | 31    | WP_131638370.1 | molecular chaperone DnaK                                                                   | Rahnella aquatilis  | 0.00331 | 0.606728196 | -0.217005822      |
| 245 | 443   | WP_041416326.1 | MULTISPECIES: ribosome recycling factor                                                    | Serratia sp.        | 0.01433 | 0.616357617 | -0.210167233      |
| 339 | 148   | WP_113877073.1 | aspartate ammonia-lyase                                                                    | Rahnella aquatilis  | 0.04582 | 0.616497212 | -0.210068883      |
| 276 | 330   | WP_004933561.1 | MULTISPECIES: 50S ribosomal protein L21                                                    | Enterobacterales    | 0.02211 | 0.634553542 | -0.197531727      |
| 187 | 43    | WP_126480399.1 | ATP-dependent chaperone ClpB                                                               | Serratia plymuthica | 0.00484 | 0.637601778 | -0.195450481      |
| 151 | 153   | WP_037432618.1 | asparagine-tRNA ligase                                                                     | Serratia plymuthica | 0.00266 | 0.656062085 | -0.18305506       |
| 296 | 173   | WP_006321797.1 | MULTISPECIES: FOF1 ATP synthase subunit alpha                                              | Serratia sp.        | 0.02662 | 0.659414539 | -0.180841482      |
| 266 | 779   | WP_004948431.1 | MULTISPECIES: DUF883 domain-containing protein                                             | Serratia sp.        | 0.01966 | 1.536463235 | 0.186522173       |
| 150 | 513   | WP_004943122.1 | MULTISPECIES: CopC domain-containing protein YobA                                          | Serratia sp.        | 0.00261 | 1.54084068  | 0.187757736       |
| 334 | 512   | WP_126485047.1 | aminomethyl-transferring glycine dehydrogenase                                             | Serratia plymuthica | 0.04355 | 1.556544586 | 0.192161565       |
| 318 | 709   | WP_126482406.1 | tyrosine-tRNA ligase                                                                       | Serratia plymuthica | 0.03705 | 1.563182247 | 0.194009614       |
| 282 | 413   | WP_064798650.1 | MULTISPECIES: two-component system response regulator ArcA                                 | Serratia sp.        | 0.02307 | 1.573059093 | 0.196745038       |
| 297 | 744   | WP_073440145.1 | adenylosuccinate lyase                                                                     | Serratia plymuthica | 0.0269  | 1.595448229 | 0.202882716       |
| 292 | 414   | WP_015689898.1 | MULTISPECIES: thiol peroxidase                                                             | Rahnella sp.        | 0.02547 | 1.611182796 | 0.207144816       |
| 305 | 732   | WP_126527517.1 | murein hydrolase activator NlpD                                                            | Serratia plymuthica | 0.03164 | 1.618988571 | 0.209243783       |
| 222 | 271   | WP_081481112.1 | MULTISPECIES: transcription antiterminator/RNA stability regulator CspE                    | Rahnella sp.        | 0.00932 | 1.630555476 | 0.212335579       |
| 273 | 793   | WP_126527372.1 | uridine phosphorylase                                                                      | Serratia plymuthica | 0.02138 | 1.643531148 | 0.215777939       |
| 315 | 526   | WP_062792216.1 | MULTISPECIES: NAD(P)H-dependent oxidoreductase                                             | Serratia sp.        | 0.03439 | 1.651172803 | 0.217792526       |
| 304 | 369   | WP_063202862.1 | L-asparaginase 2, partial                                                                  | Serratia plymuthica | 0.03115 | 1.709982084 | 0.23299156        |
| 237 | 74    | WP_004944077.1 | alpha-glucosidase                                                                          | Serratia plymuthica | 0.01219 | 1.735842833 | 0.239510401       |
| 214 | 486   | WP_006325948.1 | MULTISPECIES: peptidoglycan-binding protein LysM                                           | Serratia sp.        | 0.0077  | 1.786416294 | 0.251982671       |
| 330 | 316   | WP_013577396.1 | MULTISPECIES: DNA-binding protein HU-alpha                                                 | Yersiniaceae        | 0.04114 | 1.807519105 | 0.257082896       |
| 284 | 554   | WP_073440890.1 | fused PTS fructose transporter subunit IIA/HPr protein                                     | Serratia plymuthica | 0.0235  | 1.852949746 | 0.267863641       |
| 108 | 199   | WP_004943793.1 | MULTISPECIES: glycine zipper 2TM domain-containing protein                                 | Serratia sp.        | 0.0012  | 1.923644662 | 0.284124852       |
| 322 | 436   | WP_013811573.1 | MULTISPECIES: ribosome-associated translation inhibitor RaiA                               | Serratia sp.        | 0.03968 | 1.925534099 | 0.284551214       |
| 77  | 91    | WP_062870397.1 | porin OmpC                                                                                 | Serratia plymuthica | 0.0006  | 1.946176227 | 0.289182163       |
| 288 | 286   | WP_112198666.1 | MULTISPECIES: ribonucleotide-diphosphate reductase subunit beta                            | Rahnella sp.        | 0.02443 | 1.987086199 | 0.298216707       |
| 332 | 575   | WP_113877028.1 | MULTISPECIES: acetyl-CoA carboxylase, carboxyltransferase subunit beta                     | Rahnella sp.        | 0.0424  | 2.014193945 | 0.304101286       |
| 314 | 77    | WP_006323817.1 | MULTISPECIES: ABC transporter substrate-binding protein                                    | Serratia sp.        | 0.03422 | 2.032897012 | 0.308115378       |
| 336 | 753   | WP_063201285.1 | endonuclease                                                                               | Serratia plymuthica | 0.04488 | 2.112572527 | 0.324811628       |
| 333 | 830   | WP_013814033.1 | MULTISPECIES: nitrate reductase catalytic subunit NapA                                     | Serratia sp.        | 0.0425  | 2.12409673  | 0.327174729       |
| 240 | 425   | WP_073441200.1 | capsule assembly Wzi family protein                                                        | Serratia plymuthica | 0.01228 | 2.124827572 | 0.327323693       |
| 294 | 473   | WP_126480386.1 | DUF481 domain-containing protein                                                           | Serratia plymuthica | 0.02615 | 2.137966009 | 0.330000796       |
| 289 | 528   | WP_004949246.1 | MULTISPECIES: preprotein translocase subunit YajC                                          | Serratia sp.        | 0.02466 | 2.139055609 | 0.330222075       |
| 310 | 252   | WP_013577542.1 | MULTISPECIES: ketol-acid reductoisomerase                                                  | Rahnella sp.        | 0.03272 | 2.153573006 | 0.333159599       |
| 309 | 293   | WP_020438738.1 | MULTISPECIES: type 1 fimbrial protein                                                      | Serratia sp.        | 0.0327  | 2.165518968 | 0.335561992       |
| 341 | 841   | WP_126483126.1 | exodeoxyribonuclease III                                                                   | Serratia plymuthica | 0.04627 | 2.184753627 | 0.339402469       |
| 134 | 107   | WP_013576426.1 | MULTISPECIES: peptidoglycan-associated lipoprotein Pal                                     | Rahnella sp.        | 0.00198 | 2.209027038 | 0.344201031       |
| 119 | 177   | WP_013814922.1 | MULTISPECIES: oligopeptidase A                                                             | Serratia sp.        | 0.00155 | 2.257356166 | 0.353600088       |
| 264 | 585   | WP_126527586.1 | hypothetical protein                                                                       | Serratia plymuthica | 0.01949 | 2.302625124 | 0.362223239       |
| 278 | 331   | WP_015696270.1 | glutamine-hydrolyzing GMP synthase                                                         | Rahnella aquatilis  | 0.02244 | 2.36302271  | 0.373467896       |
| 316 | 620   | WP_013811512.1 | MULTISPECIES: glutamate-1-semialdehyde 2,1-aminomutase                                     | Serratia sp.        | 0.03459 | 2.390296767 | 0.378451824       |
| 338 | 325   | WP_145917148.1 | serine-type D-Ala-D-Ala carboxypeptidase                                                   | Serratia plymuthica | 0.04559 | 2.403393016 | 0.380824795       |
| 300 | 545   | WP_126485188.1 | DUF2884 domain-containing protein                                                          | Serratia plymuthica | 0.02807 | 2.456273961 | 0.390276804       |
| 308 | 532   | WP_112291485.1 | MULTISPECIES: nucleoside-specific channel-forming protein Tsx                              | Rahnella sp.        | 0.03266 | 2.4616921   | 0.391233732       |
| 122 | 706   | WP_126484195.1 | histidine ABC transporter substrate-binding protein HisJ                                   | Serratia plymuthica | 0.00169 | 2.489848454 | 0.396172914       |
| 327 | 600   | WP_113876936.1 | MULTISPECIES: glutathione-disulfide reductase                                              | Rahnella sp.        | 0.04081 | 2.506897826 | 0.399136634       |
| 325 | 627   | WP_126484855.1 | murein transglycosylase A                                                                  | Serratia plymuthica | 0.0402  | 2.522097382 | 0.401761851       |
| 238 | 669   | WP_073439459.1 | ABC transporter substrate-binding protein                                                  | Serratia plymuthica | 0.01221 | 2.552730113 | 0.407004902       |
| 180 | 856   | WP_006323187.1 | MULTISPECIES: entericidin A/B family lipoprotein                                           | Serratia sp.        | 0.00447 | 2.576061594 | 0.410956243       |
| 78  | 313   | WP_122289290.1 | endolytic peptidoglycan transglycosylase RlpA                                              | Serratia plymuthica | 0.0006  | 2.635439716 | 0.420853086       |
| 227 | 332   | WP_043912966.1 | ferrichrome porin FhuA                                                                     | Serratia plymuthica | 0.01032 | 2.665565351 | 0.425789334       |
| 337 | 524   | WP_006317468.1 | MULTISPECIES: peptidyl-prolyl cis-trans isomerase                                          | Serratia sp.        | 0.04542 | 2.770092334 | 0.442494245       |
| 233 | 696   | WP_004949671.1 | MULTISPECIES: glutamine-tRNA ligase                                                        | Serratia sp.        | 0.01154 | 2.774332222 | 0.443158466       |
| 164 | 225   | WP_062869220.1 | glycerophosphodiester phosphodiesterase                                                    | Serratia plymuthica | 0.00329 | 2.784058807 | 0.444678405       |
| 192 | 109   | WP_013814057.1 | MULTISPECIES: outer membrane protein assembly factor BamC                                  | Serratia sp.        | 0.00543 | 2.809616964 | 0.448647116       |
| 178 | 517   | WP_037037332.1 | MULTISPECIES: ACP S-malonyltransferase                                                     | Rahnella sp.        | 0.00424 | 2.820850002 | 0.450379993       |
| 105 | 363   | WP_015696434.1 | amidophosphoribosyltransferase                                                             | Rahnella aquatilis  | 0.00112 | 2.841909836 | 0.453610295       |
| 126 | 66    | WP_073439813.1 | aldose 1-epimerase family protein                                                          | Serratia plymuthica | 0.00184 | 2.849572153 | 0.454779658       |
| 204 | 122   | WP_112289500.1 | MULTISPECIES: ribonucleoside-diphosphate reductase subunit alpha                           | Rahnella sp.        | 0.00645 | 2.862303257 | 0.456715645       |
| 206 | 114   | WP_126485974.1 | ketol-acid reductoisomerase                                                                | Serratia plymuthica | 0.00666 | 2.874541995 | 0.458568658       |
| 136 | 577   | WP_122288861.1 | DUF3313 domain-containing protein                                                          | Serratia plymuthica | 0.00215 | 2.931462276 | 0.46708431        |
| 268 | 6     | WP_063200275.1 | pitrilysin                                                                                 | Serratia plymuthica | 0.02048 | 2.987017894 | 0.475237824       |

| Row | Index | Protein code   | Protein identification                                                  | Reference organism  | p-value  | Fold Change | Log (Fold Change) |
|-----|-------|----------------|-------------------------------------------------------------------------|---------------------|----------|-------------|-------------------|
| 160 | 741   | WP_126484412.1 | transaldolase                                                           | Serratia plymuthica | 0.00311  | 2.991263854 | 0.475854723       |
| 270 | 824   | WP_126480584.1 | DUF2076 domain-containing protein                                       | Serratia plymuthica | 0.02074  | 3.027976568 | 0.48115251        |
| 249 | 135   | WP_122288872.1 | S9 family peptidase                                                     | Serratia plymuthica | 0.01497  | 3.068592189 | 0.486939175       |
| 181 | 542   | WP_126482196.1 | nucleoside-specific channel-forming protein Tsx                         | Serratia plymuthica | 0.00452  | 3.075684728 | 0.487941816       |
| 303 | 68    | WP_112286943.1 | MULTISPECIES: cell division protein FtsZ                                | Rahnella sp.        | 0.03062  | 3.089456851 | 0.489882134       |
| 271 | 180   | WP_073440048.1 | catalse                                                                 | Serratia plymuthica | 0.02091  | 3.123961564 | 0.494705682       |
| 115 | 604   | WP_004942697.1 | MULTISPECIES: L,D-transpeptidase                                        | Serratia sp.        | 0.00142  | 3.131163223 | 0.495705707       |
| 36  | 226   | WP_063201917.1 | cystine ABC transporter substrate-binding protein                       | Serratia plymuthica | 0.00014  | 3.177897073 | 0.502139827       |
| 55  | 748   | WP_063200032.1 | betaine-aldehyde dehydrogenase                                          | Serratia plymuthica | 0.00029  | 3.268735745 | 0.514379812       |
| 209 | 403   | WP_062871046.1 | MipA/OmpV family protein                                                | Serratia plymuthica | 0.00702  | 3.271939577 | 0.514805275       |
| 163 | 58    | WP_122288888.1 | penicillin-binding protein activator                                    | Serratia plymuthica | 0.00325  | 3.272335718 | 0.514857853       |
| 27  | 311   | WP_004942530.1 | MULTISPECIES: arginine ABC transporter substrate-binding protein        | Serratia sp.        | 8.14E-05 | 3.277435414 | 0.515534142       |
| 262 | 222   | WP_073441219.1 | N-acetylmuramoyl-L-alanine amidase                                      | Serratia plymuthica | 0.01933  | 3.288536507 | 0.517002667       |
| 166 | 297   | WP_062791335.1 | murein hydrolase activator NlpD                                         | Serratia plymuthica | 0.0033   | 3.290016913 | 0.517198131       |
| 58  | 782   | WP_073440375.1 | peptidase inhibitor I78 family protein                                  | Serratia plymuthica | 0.0003   | 3.324351595 | 0.52170695        |
| 155 | 320   | WP_047606344.1 | aminopeptidase N                                                        | Rahnella aquatilis  | 0.00278  | 3.331605281 | 0.522653542       |
| 269 | 715   | WP_113876926.1 | peptidyl-diipeptidase Dcp                                               | Rahnella aquatilis  | 0.02066  | 3.377280678 | 0.528567155       |
| 57  | 94    | WP_013814266.1 | MULTISPECIES: outer membrane protein assembly factor BamA               | Serratia sp.        | 0.0003   | 3.384643748 | 0.529512964       |
| 221 | 220   | WP_112289028.1 | MULTISPECIES: thymidine phosphorylase                                   | Rahnella sp.        | 0.00914  | 3.42218428  | 0.534033392       |
| 189 | 631   | WP_063196854.1 | osmotically-inducible lipoprotein OsmE                                  | Serratia plymuthica | 0.00515  | 3.431747075 | 0.535515272       |
| 130 | 457   | WP_110605936.1 | hypothetical protein                                                    | Serratia plymuthica | 0.00187  | 3.492174567 | 0.543095945       |
| 186 | 140   | WP_013811470.1 | MULTISPECIES: peptidylprolyl isomerase SurA                             | Serratia sp.        | 0.0048   | 3.516999249 | 0.546172276       |
| 95  | 508   | WP_004943172.1 | hypothetical protein                                                    | Serratia plymuthica | 0.00089  | 3.528838346 | 0.547631764       |
| 91  | 612   | WP_047612859.1 | pitrilysin                                                              | Rahnella aquatilis  | 0.00082  | 3.537416532 | 0.548686201       |
| 123 | 189   | WP_006323429.1 | MULTISPECIES: L,D-transpeptidase family protein                         | Serratia sp.        | 0.00172  | 3.563478481 | 0.551874141       |
| 104 | 215   | WP_006322974.1 | ABC transporter substrate-binding protein                               | Serratia plymuthica | 0.00109  | 3.583692584 | 0.554330748       |
| 177 | 685   | WP_122289575.1 | Fe2+-enterobactin ABC transporter substrate-binding protein             | Serratia plymuthica | 0.00423  | 3.584560802 | 0.554435951       |
| 195 | 834   | WP_126527408.1 | N-acetyltransferase                                                     | Serratia plymuthica | 0.00558  | 3.650214871 | 0.56231843        |
| 198 | 409   | WP_004949342.1 | MULTISPECIES: hypothetical protein                                      | Serratia sp.        | 0.00601  | 3.652117965 | 0.562544797       |
| 110 | 829   | WP_073440327.1 | MULTISPECIES: ribosome maturation factor RimP                           | Serratia sp.        | 0.00123  | 3.713822029 | 0.569821088       |
| 236 | 583   | WP_112289032.1 | MULTISPECIES: molecular chaperone OsmY                                  | Rahnella sp.        | 0.01209  | 3.862654539 | 0.586885868       |
| 196 | 750   | WP_037432055.1 | uroporphyrinogen-III C-methyltransferase                                | Serratia plymuthica | 0.00562  | 3.872032702 | 0.587939017       |
| 4   | 504   | WP_004945257.1 | MULTISPECIES: BON domain-containing protein                             | Serratia sp.        | 1.40E-06 | 3.890673826 | 0.590024823       |
| 20  | 664   | WP_073440218.1 | thioredoxin domain-containing protein                                   | Serratia plymuthica | 5.21E-05 | 3.922946742 | 0.593612412       |
| 101 | 702   | WP_041417326.1 | methionine ABC transporter substrate-binding protein                    | Serratia plymuthica | 0.00101  | 3.932409043 | 0.594658686       |
| 76  | 275   | WP_006324520.1 | arginine ABC transporter substrate-binding protein                      | Serratia plymuthica | 0.00057  | 3.977959286 | 0.599660334       |
| 188 | 133   | WP_015696692.1 | porin OmpA                                                              | Rahnella aquatilis  | 0.00504  | 3.984142459 | 0.600334859       |
| 212 | 852   | WP_073440264.1 | P1 family peptidase                                                     | Serratia plymuthica | 0.00758  | 4.00871568  | 0.603005255       |
| 127 | 580   | WP_122289187.1 | LPS assembly protein LptD                                               | Serratia plymuthica | 0.00184  | 4.028014771 | 0.605091054       |
| 74  | 267   | WP_122288565.1 | bifunctional glucose-1-phosphatase/inositol phosphatase                 | Serratia plymuthica | 0.00054  | 4.034718315 | 0.60581322        |
| 139 | 183   | WP_063201108.1 | oligopeptide ABC transporter substrate-binding protein OppA             | Serratia plymuthica | 0.00228  | 4.036752358 | 0.606032108       |
| 156 | 84    | WP_126482993.1 | oligopeptide ABC transporter substrate-binding protein OppA             | Serratia plymuthica | 0.00286  | 4.051134078 | 0.607576617       |
| 246 | 175   | WP_062870706.1 | class C beta-lactamase                                                  | Serratia plymuthica | 0.01434  | 4.061174123 | 0.60865161        |
| 87  | 191   | WP_004952064.1 | MULTISPECIES: outer membrane protein assembly factor BamB               | Serratia sp.        | 0.00072  | 4.087892825 | 0.611499501       |
| 205 | 596   | WP_073440841.1 | glutamine-hydrolyzing GMP synthase                                      | Serratia plymuthica | 0.00647  | 4.093675959 | 0.612113462       |
| 19  | 50    | WP_047607744.1 | cystine ABC transporter substrate-binding protein                       | Rahnella aquatilis  | 5.19E-05 | 4.108997371 | 0.613735863       |
| 31  | 167   | WP_126486177.1 | ABC transporter substrate-binding protein                               | Serratia plymuthica | 9.92E-05 | 4.113974265 | 0.614261571       |
| 128 | 329   | WP_004949394.1 | MULTISPECIES: bifunctional UDP-sugar hydrolase/5'-nucleotidase          | Serratia sp.        | 0.00185  | 4.165095166 | 0.619624929       |
| 132 | 362   | WP_126481301.1 | glutamine ABC transporter substrate-binding protein GlnH                | Serratia plymuthica | 0.00189  | 4.293372345 | 0.632798555       |
| 175 | 783   | WP_062870578.1 | hypothetical protein                                                    | Serratia plymuthica | 0.00397  | 4.304847357 | 0.633957757       |
| 217 | 256   | WP_006328507.1 | MULTISPECIES: peptidylprolyl isomerase A                                | Serratia sp.        | 0.00813  | 4.329657128 | 0.636453505       |
| 25  | 12    | WP_006324584.1 | porin OmpA                                                              | Serratia plymuthica | 7.25E-05 | 4.346752532 | 0.638164916       |
| 64  | 367   | WP_006322224.1 | hypothetical protein                                                    | Serratia plymuthica | 0.00042  | 4.378094872 | 0.641285168       |
| 311 | 802   | WP_063198203.1 | hypothetical protein                                                    | Serratia plymuthica | 0.03277  | 4.383350374 | 0.641806186       |
| 120 | 689   | WP_015697849.1 | carboxy terminal-processing peptidase                                   | Rahnella aquatilis  | 0.00158  | 4.393475874 | 0.642808246       |
| 42  | 633   | WP_004949970.1 | MULTISPECIES: OmpA family protein                                       | Serratia sp.        | 0.00019  | 4.425110758 | 0.645924145       |
| 210 | 582   | WP_073999785.1 | multifunctional acyl-CoA thioesterase I/protease I/lysophospholipase L1 | Serratia plymuthica | 0.00712  | 4.42860929  | 0.646267367       |
| 201 | 448   | WP_020439668.1 | glycine betaine/L-proline ABC transporter ATP-binding protein ProV      | Serratia plymuthica | 0.00617  | 4.680707461 | 0.670311499       |
| 97  | 80    | WP_006328168.1 | outer membrane channel protein TolC                                     | Serratia plymuthica | 0.0009   | 4.70265873  | 0.672343463       |
| 80  | 193   | WP_122288956.1 | L,D-transpeptidase family protein                                       | Serratia plymuthica | 0.00661  | 4.708365847 | 0.672870201       |
| 140 | 235   | WP_122289073.1 | multicopper oxidase CueO                                                | Serratia plymuthica | 0.0023   | 4.76044217  | 0.677647294       |
| 90  | 282   | WP_065505971.1 | MULTISPECIES: cell division protein CpoB                                | Serratia sp.        | 0.00082  | 4.832876651 | 0.684205711       |
| 29  | 581   | WP_111738524.1 | outer membrane channel protein TolC                                     | Serratia plymuthica | 9.12E-05 | 4.949766466 | 0.694584709       |
| 165 | 728   | WP_073440858.1 | DUF1090 domain-containing protein                                       | Serratia plymuthica | 0.00329  | 4.963085772 | 0.695751781       |
| 194 | 663   | WP_126480797.1 | co-chaperone YbbN                                                       | Serratia plymuthica | 0.00553  | 4.979904148 | 0.697220984       |
| 68  | 360   | WP_112288331.1 | MULTISPECIES: outer membrane protein assembly factor BamA               | Rahnella sp.        | 0.00049  | 4.997285468 | 0.698734159       |
| 169 | 561   | WP_122289113.1 | oligopeptide ABC transporter substrate-binding protein OppA             | Serratia plymuthica | 0.00345  | 5.018554478 | 0.700578643       |
| 103 | 71    | WP_004950512.1 | MULTISPECIES: ABC transporter substrate-binding protein                 | Serratia sp.        | 0.00109  | 5.044140765 | 0.702787198       |
| 85  | 145   | WP_073439860.1 | carboxy terminal-processing peptidase                                   | Serratia plymuthica | 0.00069  | 5.054789889 | 0.703703108       |
| 162 | 385   | WP_004949986.1 | protein CreA                                                            | Serratia plymuthica | 0.0032   | 5.120243887 | 0.709290648       |
| 185 | 243   | WP_047609790.1 | murein transglycosylase                                                 | Rahnella aquatilis  | 0.00464  | 5.13031446  | 0.710143986       |
| 83  | 698   | WP_126486190.1 | NAD(P)H-dependent oxidoreductase                                        | Serratia plymuthica | 0.00064  | 5.17321183  | 0.713760262       |
| 39  | 522   | WP_065506637.1 | MULTISPECIES: divisome-associated lipoprotein YraP                      | Serratia sp.        | 0.00017  | 5.197880879 | 0.715826322       |
| 117 | 629   | WP_004945038.1 | MULTISPECIES: 2-hydroxyacid dehydrogenase                               | Serratia sp.        | 0.00153  | 5.209832366 | 0.716823749       |
| 33  | 54    | WP_015698105.1 | Tol-Pal system protein TolB                                             | Rahnella aquatilis  | 0.00013  | 5.246720291 | 0.719887912       |
| 258 | 674   | WP_064798698.1 | 3',5'-cyclic-nucleotide phosphodiesterase                               | Serratia plymuthica | 0.01769  | 5.279804439 | 0.722617837       |
| 193 | 787   | WP_126528909.1 | autoinducer 2 ABC transporter substrate-binding protein                 | Serratia plymuthica | 0.00545  | 5.321336519 | 0.726020724       |
| 129 | 483   | WP_113877622.1 | MULTISPECIES: sulfate ABC transporter substrate-binding protein         | Rahnella sp.        | 0.00185  | 5.337523292 | 0.727339783       |
| 111 | 380   | WP_112287456.1 | MULTISPECIES: ABC transporter substrate-binding protein                 | Rahnella sp.        | 0.00128  | 5.378557423 | 0.73066581        |
| 86  | 3     | WP_063198645.1 | murein transglycosylase                                                 | Serratia plymuthica | 0.0007   | 5.401787852 | 0.732537524       |
| 30  | 174   | WP_122289663.1 | thiol:disulfide interchange protein DsbA                                | Serratia plymuthica | 9.65E-05 | 5.436655079 | 0.735331781       |
| 213 | 662   | WP_112288890.1 | MULTISPECIES: transketolase                                             | Rahnella sp.        | 0.00761  | 5.505347725 | 0.740784755       |
| 38  | 106   | WP_004942247.1 | MULTISPECIES: outer membrane protein OmpX                               | Serratia sp.        | 0.00017  | 5.636147282 | 0.750982333       |
| 82  | 497   | RMN19543.1     | hypothetical protein ALQ63_00888                                        | Serratia plymuthica | 0.00064  | 5.64073456  | 0.751335663       |
| 112 | 622   | WP_063197910.1 | LPS assembly lipoprotein LptE                                           | Serratia plymuthica | 0.00131  | 5.644273676 | 0.751608063       |
| 113 | 455   | WP_122289110.1 | NAD(P)H nitroreductase                                                  | Serratia plymuthica | 0.00132  | 5.725114064 | 0.751784144       |
| 138 | 101   | WP_122288887.1 | serine endoprotease DegQ                                                | Serratia plymuthica | 0.00222  | 6.036711615 | 0.780800429       |
| 9   | 652   | WP_126528657.1 | YgdI/YgdR family lipoprotein                                            | Serratia plymuthica | 1.38E-05 | 6.125022545 | 0.787107692       |

| Row | Index | Protein code   | Protein identification                                                                 | Reference organism  | p-value  | Fold Change | Log (Fold Change) |
|-----|-------|----------------|----------------------------------------------------------------------------------------|---------------------|----------|-------------|-------------------|
| 202 | 266   | WP_004948518.1 | MULTISPECIES: phospholipid-binding protein MlaC                                        | Serratia sp.        | 0.00633  | 6.125597037 | 0.787148424       |
| 84  | 389   | WP_073440018.1 | beta-glucosidase BglX                                                                  | Serratia plymuthica | 0.00067  | 6.135973572 | 0.78788348        |
| 125 | 718   | WP_113877411.1 | MULTISPECIES: murein hydrolase activator NlpD                                          | Rahnella sp.        | 0.0018   | 6.183115326 | 0.791207347       |
| 21  | 251   | WP_013812141.1 | MULTISPECIES: fimbria/pilus periplasmic chaperone                                      | Serratia sp.        | 5.38E-05 | 6.203088729 | 0.792607993       |
| 79  | 714   | WP_126484642.1 | two-component system QseEF-associated lipoprotein QseG                                 | Serratia plymuthica | 0.0006   | 6.256348451 | 0.796320929       |
| 149 | 488   | RMN17366.1     | hypothetical protein ALQ63_02794                                                       | Serratia plymuthica | 0.00257  | 6.284137499 | 0.798245679       |
| 37  | 574   | WP_006323718.1 | MULTISPECIES: outer membrane protein assembly factor BamD                              | Serratia sp.        | 0.00015  | 6.381012661 | 0.804889606       |
| 173 | 568   | WP_013811875.1 | MULTISPECIES: LPS assembly lipoprotein LptE                                            | Serratia sp.        | 0.00376  | 6.476574538 | 0.811345368       |
| 71  | 201   | WP_112290698.1 | MULTISPECIES: sulfate ABC transporter substrate-binding protein                        | Rahnella sp.        | 0.00051  | 6.591565975 | 0.818988603       |
| 51  | 534   | WP_062868083.1 | porin                                                                                  | Serratia plymuthica | 0.00026  | 6.62563516  | 0.821227518       |
| 43  | 668   | WP_013813948.1 | MULTISPECIES: phospholipid-binding lipoprotein MlaA                                    | Serratia sp.        | 0.00019  | 6.800748397 | 0.832556708       |
| 10  | 207   | WP_004952521.1 | MULTISPECIES: oxidative stress defense protein                                         | Serratia sp.        | 2.34E-05 | 6.903136677 | 0.839046472       |
| 40  | 38    | WP_006326771.1 | porin OmpC                                                                             | Serratia plymuthica | 0.00019  | 6.908777779 | 0.839401224       |
| 184 | 211   | WP_112289187.1 | MULTISPECIES: Tol-Pal system protein TolB                                              | Rahnella sp.        | 0.00461  | 6.967309906 | 0.843065128       |
| 23  | 49    | WP_004949773.1 | MULTISPECIES: Tol-Pal system protein TolB                                              | Serratia sp.        | 6.00E-05 | 6.978868086 | 0.843784989       |
| 16  | 104   | WP_004944994.1 | DUF1471 domain-containing protein                                                      | Serratia plymuthica | 5.08E-05 | 7.030992123 | 0.847016611       |
| 142 | 250   | WP_004942614.1 | MULTISPECIES: outer membrane lipoprotein chaperone LolA                                | Serratia sp.        | 0.00233  | 7.0423015   | 0.847714614       |
| 6   | 721   | WP_126480972.1 | Tol-Pal system protein TolB                                                            | Serratia plymuthica | 3.65E-06 | 7.141716013 | 0.853802577       |
| 15  | 630   | WP_112287581.1 | MULTISPECIES: outer membrane protein assembly factor BamC                              | Rahnella sp.        | 4.59E-05 | 7.381006408 | 0.868115582       |
| 159 | 649   | WP_013577556.1 | MULTISPECIES: ABC transporter substrate-binding protein                                | Rahnella sp.        | 0.00307  | 7.482269603 | 0.874033353       |
| 172 | 437   | WP_006328270.1 | MULTISPECIES: lipopolysaccharide ABC transporter substrate-binding protein LptA        | Serratia sp.        | 0.00364  | 7.689392446 | 0.885892027       |
| 13  | 244   | WP_004952410.1 | MULTISPECIES: bifunctional protein-disulfide isomerase/oxidoreductase DsbC             | Serratia sp.        | 3.20E-05 | 8.021905031 | 0.904277516       |
| 66  | 110   | WP_006328854.1 | sulfate ABC transporter substrate-binding protein                                      | Serratia plymuthica | 0.00048  | 8.042700305 | 0.905401886       |
| 47  | 142   | WP_062790903.1 | MULTISPECIES: ABC transporter substrate-binding protein                                | Serratia sp.        | 0.00024  | 8.327147677 | 0.920496267       |
| 114 | 15    | WP_004942332.1 | glutathione ABC transporter substrate-binding protein GsiB                             | Serratia plymuthica | 0.00136  | 8.385614917 | 0.923534915       |
| 94  | 64    | WP_006323248.1 | bifunctional 2',3'-cyclic-nucleotide 2'-phosphodiesterase/3'-nucleotidase              | Serratia plymuthica | 0.00087  | 8.97895138  | 0.95322562        |
| 63  | 418   | WP_126124940.1 | iron uptake system protein EfeO                                                        | Rahnella aquatilis  | 0.00037  | 9.158153311 | 0.96180791        |
| 99  | 97    | WP_004950859.1 | MULTISPECIES: insulinase family protein                                                | Serratia sp.        | 0.00091  | 9.392893244 | 0.972799386       |
| 102 | 371   | WP_004943016.1 | MULTISPECIES: YceI family protein                                                      | Serratia sp.        | 0.00108  | 9.610932742 | 0.982765538       |
| 182 | 467   | WP_122288686.1 | acid phosphatase                                                                       | Serratia plymuthica | 0.00457  | 9.669461334 | 0.985402281       |
| 60  | 632   | WP_131638597.1 | phospholipid-binding protein MlaC                                                      | Rahnella aquatilis  | 0.00031  | 9.678725003 | 0.985818151       |
| 72  | 708   | WP_112288332.1 | MULTISPECIES: molecular chaperone Skp                                                  | Rahnella sp.        | 0.00051  | 10.01749002 | 1.000758918       |
| 44  | 719   | WP_037432390.1 | molybdate ABC transporter substrate-binding protein                                    | Serratia plymuthica | 0.00019  | 10.10882072 | 1.004700494       |
| 118 | 355   | WP_064798747.1 | polysaccharide export protein                                                          | Serratia plymuthica | 0.00154  | 10.11376017 | 1.004912651       |
| 170 | 762   | WP_126527395.1 | N-acetylmuramoyl-L-alanine amidase AmiB                                                | Serratia plymuthica | 0.00352  | 10.15971548 | 1.006881546       |
| 53  | 551   | WP_126486390.1 | zinc ABC transporter substrate-binding protein ZnuA                                    | Serratia plymuthica | 0.00029  | 10.48579293 | 1.020601277       |
| 14  | 765   | WP_126527482.1 | thiamine ABC transporter substrate binding subunit                                     | Serratia plymuthica | 3.71E-05 | 10.55771217 | 1.023569818       |
| 81  | 605   | WP_073439559.1 | M48 family metalloproteinase                                                           | Serratia plymuthica | 0.00061  | 10.80287224 | 1.03353924        |
| 231 | 283   | WP_113878243.1 | MULTISPECIES: oxidative stress defense protein                                         | Rahnella sp.        | 0.01148  | 10.88321786 | 1.036757323       |
| 41  | 445   | WP_006324721.1 | MULTISPECIES: penicillin-binding protein activator LpoB                                | Serratia sp.        | 0.00019  | 12.10328532 | 1.082903271       |
| 92  | 759   | WP_126484392.1 | YgiW/YdeI family stress tolerance OB fold protein                                      | Serratia plymuthica | 0.00083  | 12.83015523 | 1.108231911       |
| 34  | 162   | WP_063199821.1 | serine protease inhibitor ecotin                                                       | Serratia plymuthica | 0.00013  | 12.96815822 | 1.112878301       |
| 174 | 356   | WP_004952213.1 | MULTISPECIES: molecular chaperone Skp                                                  | Serratia sp.        | 0.00384  | 13.70948267 | 1.137021067       |
| 24  | 257   | WP_013576150.1 | MULTISPECIES: carboxy terminal-processing peptidase                                    | Rahnella sp.        | 6.97E-05 | 13.80712906 | 1.140103384       |
| 234 | 289   | WP_013573626.1 | MULTISPECIES: peptidylprolyl isomerase A                                               | Rahnella sp.        | 0.01155  | 14.1272829  | 1.150058642       |
| 5   | 36    | WP_063203173.1 | FKBP-type peptidyl-prolyl cis-trans isomerase                                          | Serratia plymuthica | 1.94E-06 | 14.32480427 | 1.156088697       |
| 208 | 46    | WP_126527496.1 | serine endoprotease DegP                                                               | Serratia plymuthica | 0.00693  | 14.79160285 | 1.170015238       |
| 257 | 809   | WP_126481690.1 | porin OmpA                                                                             | Serratia plymuthica | 0.01751  | 16.04628403 | 1.205374475       |
| 7   | 5     | WP_086016609.1 | MULTISPECIES: glucans biosynthesis protein MdoG                                        | Serratia sp.        | 4.09E-06 | 16.43149673 | 1.215677125       |
| 54  | 566   | WP_004953231.1 | MULTISPECIES: periplasmic heavy metal sensor                                           | Serratia sp.        | 0.00029  | 16.44987141 | 1.216162507       |
| 35  | 700   | WP_047608839.1 | LPS assembly lipoprotein LptE                                                          | Rahnella aquatilis  | 0.00013  | 17.09842115 | 1.23295601        |
| 179 | 300   | WP_113876396.1 | MULTISPECIES: serine endoprotease DegP                                                 | Rahnella sp.        | 0.00426  | 18.44922621 | 1.265978156       |
| 207 | 391   | WP_119262138.1 | Do family serine endopeptidase                                                         | Rahnella aquatilis  | 0.00673  | 21.12496564 | 1.324796011       |
| 152 | 675   | WP_073440332.1 | glutathione ABC transporter substrate-binding protein GsiB                             | Serratia plymuthica | 0.00267  | 21.29586745 | 1.328295335       |
| 2   | 396   | WP_006320904.1 | serine protease inhibitor ecotin                                                       | Serratia plymuthica | 4.23E-08 | 21.98383196 | 1.342103396       |
| 70  | 76    | WP_013814237.1 | MULTISPECIES: glycine betaine/L-proline ABC transporter substrate-binding protein ProX | Serratia sp.        | 0.0005   | 27.99334481 | 1.447054794       |
| 46  | 39    | WP_113877246.1 | FKBP-type peptidyl-prolyl cis-trans isomerase                                          | Rahnella aquatilis  | 0.00024  | 30.93814185 | 1.490494226       |
| 17  | 73    | WP_015697963.1 | glucan biosynthesis protein G                                                          | Rahnella aquatilis  | 5.10E-05 | 32.86184741 | 1.516691975       |
| 61  | 384   | WP_126485701.1 | FKBP-type peptidyl-prolyl cis-trans isomerase                                          | Serratia plymuthica | 0.00032  | 37.56282577 | 1.574758256       |
| 28  | 377   | WP_126485956.1 | ATP-independent periplasmic protein-refolding chaperone                                | Serratia plymuthica | 8.86E-05 | 40.39854708 | 1.606365746       |
| 8   | 419   | WP_110605874.1 | glucans biosynthesis protein MdoG                                                      | Serratia plymuthica | 5.29E-06 | 54.67386872 | 1.737779806       |
| 69  | 442   | WP_112289283.1 | MULTISPECIES: thiol:disulfide interchange protein DsbA                                 | Rahnella sp.        | 0.00049  | 127.1569922 | 2.104340246       |



**Table S5.** GO terms of proteins overexpressed both in Ra4 (*Rahnella aquatilis*) and in Sp2 (*Serratia plymuthica*) treated with 0.4% NaCl vs Control.

| GO Term    | Description                                                   | P-value_Rahnella | P-value_Serratia |
|------------|---------------------------------------------------------------|------------------|------------------|
| GO:0000099 | sulfur amino acid transmembrane transporter activity          | 0.006548134      | 0.02537498       |
| GO:0000270 | peptidoglycan metabolic process                               | 0.006752674      | 0.00286326       |
| GO:0000413 | protein peptidyl-prolyl isomerization                         | 0.02157472       | 0.04108586       |
| GO:0003333 | amino acid transmembrane transport                            | 0.0352436        | 0.01416171       |
| GO:0003755 | peptidyl-prolyl cis-trans isomerase activity                  | 0.02157472       | 0.04108586       |
| GO:0003756 | protein disulfide isomerase activity                          | 0.008688366      | 0.01483782       |
| GO:0004112 | cyclic-nucleotide phosphodiesterase activity                  | 0.006548134      | 0.02537498       |
| GO:0004175 | endopeptidase activity                                        | 0.001542671      | 0.00037194       |
| GO:0004180 | carboxypeptidase activity                                     | 0.04103834       | 0.02996041       |
| GO:0004252 | serine-type endopeptidase activity                            | 0.01431698       | 0.01483782       |
| GO:0005215 | transporter activity                                          | 0.002096246      | 0.002192641      |
| GO:0006022 | aminoglycan metabolic process                                 | 0.006752674      | 0.00286326       |
| GO:0006073 | cellular glucan metabolic process                             | 0.004614553      | 0.03125707       |
| GO:0006457 | protein folding                                               | 4.33E-05         | 4.23E-05         |
| GO:0006508 | proteolysis                                                   | 0.005070263      | 0.001565315      |
| GO:0006791 | sulfur utilization                                            | 0.006548134      | 0.02537498       |
| GO:0006810 | transport                                                     | 9.54E-05         | 1.93E-09         |
| GO:0006811 | ion transport                                                 | 0.006810814      | 9.47E-06         |
| GO:0006820 | anion transport                                               | 0.009891719      | 2.24E-05         |
| GO:0006970 | response to osmotic stress                                    | 3.09E-05         | 2.87E-05         |
| GO:0006972 | hyperosmotic response                                         | 0.000577283      | 0.003660424      |
| GO:0008081 | phosphoric diester hydrolase activity                         | 0.000521021      | 0.01416171       |
| GO:0008104 | protein localization                                          | 0.004867352      | 0.000181888      |
| GO:0008233 | peptidase activity                                            | 0.005070263      | 0.001565315      |
| GO:0008234 | cysteine-type peptidase activity                              | 0.001961127      | 0.004014615      |
| GO:0008236 | serine-type peptidase activity                                | 0.000669939      | 0.004872788      |
| GO:0008272 | sulfate transport                                             | 0.001961127      | 0.03125707       |
| GO:0008933 | lytic transglycosylase activity                               | 0.01860236       | 0.01416171       |
| GO:0009057 | macromolecule catabolic process                               | 0.000775487      | 0.01407373       |
| GO:0009250 | glucan biosynthetic process                                   | 0.004614553      | 0.03125707       |
| GO:0009273 | peptidoglycan-based cell wall biogenesis                      | 0.01218291       | 0.004872788      |
| GO:0009274 | peptidoglycan-based cell wall                                 | 0.006548134      | 0.02537498       |
| GO:0009279 | cell outer membrane                                           | 0.03105572       | 4.07E-13         |
| GO:0009719 | response to endogenous stimulus                               | 4.10E-05         | 0.00063225       |
| GO:0010243 | response to organonitrogen compound                           | 0.000540739      | 0.0027648        |
| GO:0015031 | protein transport                                             | 0.006752674      | 0.007509891      |
| GO:0015171 | amino acid transmembrane transporter activity                 | 0.006548134      | 0.02537498       |
| GO:0015179 | L-amino acid transmembrane transporter activity               | 0.006548134      | 0.02537498       |
| GO:0015184 | L-cystine transmembrane transporter activity                  | 0.006548134      | 0.02537498       |
| GO:0015695 | organic cation transport                                      | 0.008688366      | 0.03125707       |
| GO:0015696 | ammonium transport                                            | 0.008688366      | 0.03125707       |
| GO:0015697 | quaternary ammonium group transport                           | 0.004614553      | 0.01416171       |
| GO:0015698 | inorganic anion transport                                     | 0.004614553      | 0.01483782       |
| GO:0015804 | neutral amino acid transport                                  | 0.006548134      | 0.02537498       |
| GO:0015811 | L-cystine transport                                           | 0.006548134      | 0.02537498       |
| GO:0015833 | peptide transport                                             | 0.001542671      | 2.92E-05         |
| GO:0015838 | amino-acid betaine transport                                  | 0.004614553      | 0.01416171       |
| GO:0015893 | drug transport                                                | 0.02781516       | 0.000735212      |
| GO:0016755 | transferase activity, transferring amino-acyl groups          | 0.001961127      | 0.004014615      |
| GO:0016807 | cysteine-type carboxypeptidase activity                       | 0.001961127      | 0.004014615      |
| GO:0016859 | cis-trans isomerase activity                                  | 0.02157472       | 0.04108586       |
| GO:0016864 | intramolecular oxidoreductase activity, transposing S-S bonds | 0.008688366      | 0.01483782       |
| GO:0017038 | protein import                                                | 4.10E-05         | 0.0027648        |
| GO:0017171 | serine hydrolase activity                                     | 0.000669939      | 0.004872788      |
| GO:0018104 | peptidoglycan-protein cross-linking                           | 0.01860236       | 0.02537498       |
| GO:0018208 | peptidyl-proline modification                                 | 0.02157472       | 0.04108586       |
| GO:0019534 | toxin transmembrane transporter activity                      | 4.10E-05         | 0.00063225       |



| GO Term    | Description                                                | P-value_Rahnella | P-value_Serratia |
|------------|------------------------------------------------------------|------------------|------------------|
| GO:0019867 | outer membrane                                             | 0.03105572       | 4.07E-13         |
| GO:0022857 | transmembrane transporter activity                         | 0.02281951       | 0.0104204        |
| GO:0030163 | protein catabolic process                                  | 0.006752674      | 0.002421263      |
| GO:0030203 | glycosaminoglycan metabolic process                        | 0.006752674      | 0.00286326       |
| GO:0030288 | outer membrane-bounded periplasmic space                   | 2.11E-26         | 1.69E-35         |
| GO:0030313 | cell envelope                                              | 4.64E-26         | 1.79E-48         |
| GO:0031460 | glycine betaine transport                                  | 0.004614553      | 0.01416171       |
| GO:0031647 | regulation of protein stability                            | 0.0352436        | 0.01416171       |
| GO:0031975 | envelope                                                   | 4.64E-26         | 1.79E-48         |
| GO:0032153 | cell division site                                         | 0.000262603      | 0.001894049      |
| GO:0033036 | macromolecule localization                                 | 0.025298         | 6.69E-07         |
| GO:0042493 | response to drug                                           | 0.03408151       | 0.008961024      |
| GO:0042546 | cell wall biogenesis                                       | 0.01218291       | 0.004872788      |
| GO:0042578 | phosphoric ester hydrolase activity                        | 0.03048673       | 0.01251551       |
| GO:0042597 | periplasmic space                                          | 9.79E-32         | 1.37E-40         |
| GO:0042886 | amide transport                                            | 0.001542671      | 2.92E-05         |
| GO:0042891 | obsolete antibiotic transport                              | 0.000540739      | 0.02601521       |
| GO:0043164 | Gram-negative-bacterium-type cell wall biogenesis          | 0.001961127      | 0.004014615      |
| GO:0043199 | sulfate binding                                            | 0.001961127      | 0.03125707       |
| GO:0043213 | bacteriocin transport                                      | 4.10E-05         | 0.0027648        |
| GO:0044036 | cell wall macromolecule metabolic process                  | 0.02171932       | 0.01107193       |
| GO:0044042 | glucan metabolic process                                   | 0.000540739      | 0.007259702      |
| GO:0044257 | cellular protein catabolic process                         | 0.04103834       | 0.02001884       |
| GO:0044462 | obsolete external encapsulating structure part             | 0.03105572       | 4.07E-13         |
| GO:0045184 | establishment of protein localization                      | 0.004867352      | 0.000105546      |
| GO:0046677 | response to antibiotic                                     | 0.009891719      | 0.02672135       |
| GO:0046678 | response to bacteriocin                                    | 4.10E-05         | 0.00063225       |
| GO:0050821 | protein stabilization                                      | 0.0352436        | 0.01416171       |
| GO:0051179 | localization                                               | 0.000604922      | 5.28E-08         |
| GO:0051234 | establishment of localization                              | 7.87E-05         | 5.20E-11         |
| GO:0051273 | beta-glucan metabolic process                              | 0.000521021      | 0.004014615      |
| GO:0051274 | beta-glucan biosynthetic process                           | 0.000521021      | 0.004014615      |
| GO:0051603 | proteolysis involved in cellular protein catabolic process | 0.03048673       | 0.007176907      |
| GO:0055085 | transmembrane transport                                    | 0.03906357       | 0.01088411       |
| GO:0061077 | chaperone-mediated protein folding                         | 0.009656712      | 0.001183254      |
| GO:0070004 | cysteine-type exopeptidase activity                        | 0.001961127      | 0.004014615      |
| GO:0070011 | peptidase activity, acting on L-amino acid peptides        | 0.001255046      | 0.001042228      |
| GO:0071236 | cellular response to antibiotic                            | 0.000192177      | 0.0027648        |
| GO:0071237 | cellular response to bacteriocin                           | 4.10E-05         | 0.00063225       |
| GO:0071310 | cellular response to organic substance                     | 0.00118355       | 0.01483782       |
| GO:0071417 | cellular response to organonitrogen compound               | 4.10E-05         | 0.00063225       |
| GO:0071495 | cellular response to endogenous stimulus                   | 4.10E-05         | 0.00063225       |
| GO:0071554 | cell wall organization or biogenesis                       | 0.02171932       | 0.01571855       |
| GO:0071702 | organic substance transport                                | 0.000213493      | 3.02E-08         |
| GO:0071705 | nitrogen compound transport                                | 3.89E-06         | 4.06E-09         |
| GO:0071972 | peptidoglycan L,D-transpeptidase activity                  | 0.001961127      | 0.004014615      |
| GO:0072337 | modified amino acid transport                              | 5.86E-05         | 0.00051735       |
| GO:0072348 | sulfur compound transport                                  | 0.000308292      | 0.001838301      |
| GO:0072349 | modified amino acid transmembrane transporter activity     | 0.006548134      | 0.02537498       |
| GO:0140096 | catalytic activity, acting on a protein                    | 9.00E-05         | 0.000300407      |
| GO:1901652 | response to peptide                                        | 4.10E-05         | 0.00063225       |
| GO:1901653 | cellular response to peptide                               | 4.10E-05         | 0.00063225       |
| GO:1901682 | sulfur compound transmembrane transporter activity         | 0.006548134      | 0.02537498       |
| GO:1901698 | response to nitrogen compound                              | 0.000540739      | 0.0027648        |
| GO:1901699 | cellular response to nitrogen compound                     | 4.10E-05         | 0.00063225       |
| GO:1901700 | response to oxygen-containing compound                     | 0.000280749      | 0.02160075       |

| GO Term    | Description                                     | P-value_Rahnella | P-value_Serratia |
|------------|-------------------------------------------------|------------------|------------------|
| GO:1901701 | cellular response to oxygen-containing compound | 3.93E-05         | 0.006100628      |
| GO:1901998 | toxin transport                                 | 4.10E-05         | 0.00063225       |
| GO:1902475 | L-alpha-amino acid transmembrane transport      | 0.0352436        | 0.01416171       |

**Table S6.** GO terms of proteins overexpressed only in Ra4 (*Rahnella aquatilis*) treated with 0.4% NaCl vs Control.

| GO Term    | Description                                        | P-value (Rahnella) |
|------------|----------------------------------------------------|--------------------|
| GO:0000101 | sulfur amino acid transport                        | 0.0352436          |
| GO:0000302 | response to reactive oxygen species                | 0.02157472         |
| GO:0000920 | septum digestion after cytokinesis                 | 0.0352436          |
| GO:0001896 | autolysis                                          | 0.01860236         |
| GO:0004185 | serine-type carboxypeptidase activity              | 0.01431698         |
| GO:0005342 | organic acid transmembrane transporter activity    | 0.0352436          |
| GO:0005976 | polysaccharide metabolic process                   | 0.02171932         |
| GO:0006026 | aminoglycan catabolic process                      | 0.01860236         |
| GO:0006027 | glycosaminoglycan catabolic process                | 0.01860236         |
| GO:0008514 | organic anion transmembrane transporter activity   | 0.0352436          |
| GO:0008932 | lytic endotransglycosylase activity                | 0.006548134        |
| GO:0009253 | peptidoglycan catabolic process                    | 0.01860236         |
| GO:0009628 | response to abiotic stimulus                       | 0.02308372         |
| GO:0019904 | protein domain specific binding                    | 0.03483599         |
| GO:0034605 | cellular response to heat                          | 0.01860236         |
| GO:0042026 | protein refolding                                  | 0.008688366        |
| GO:0043085 | positive regulation of catalytic activity          | 0.04103834         |
| GO:0044093 | positive regulation of molecular function          | 0.04103834         |
| GO:0046943 | carboxylic acid transmembrane transporter activity | 0.0352436          |
| GO:0048029 | monosaccharide binding                             | 0.01860236         |
| GO:0050896 | response to stimulus                               | 0.03459633         |
| GO:0051336 | regulation of hydrolase activity                   | 0.03048673         |
| GO:0051345 | positive regulation of hydrolase activity          | 0.01860236         |
| GO:0070008 | serine-type exopeptidase activity                  | 0.01431698         |
| GO:0071474 | cellular hyperosmotic response                     | 0.0352436          |
| GO:1901565 | organonitrogen compound catabolic process          | 0.03484065         |

**Table S7.** GO terms of proteins overexpressed only in Sp2 (*Serratia plymuthica*) treated with 0.4% NaCl vs Control.

| GO Term    | Description                                                    | P-value (Serratia) |
|------------|----------------------------------------------------------------|--------------------|
| GO:0000041 | transition metal ion transport                                 | 0.03125707         |
| GO:0000746 | conjugation                                                    | 0.004014615        |
| GO:0001530 | lipopolysaccharide binding                                     | 9.91E-05           |
| GO:0003921 | GMP synthase activity                                          | 0.02537498         |
| GO:0003922 | GMP synthase (glutamine-hydrolyzing) activity                  | 0.02537498         |
| GO:0004866 | endopeptidase inhibitor activity                               | 0.02537498         |
| GO:0004867 | serine-type endopeptidase inhibitor activity                   | 0.02537498         |
| GO:0006023 | aminoglycan biosynthetic process                               | 0.00984618         |
| GO:0006024 | glycosaminoglycan biosynthetic process                         | 0.00984618         |
| GO:0006857 | oligopeptide transport                                         | 0.00051735         |
| GO:0006865 | amino acid transport                                           | 0.01483782         |
| GO:0006869 | lipid transport                                                | 0.000462792        |
| GO:0007165 | signal transduction                                            | 0.02601521         |
| GO:0008252 | nucleotidase activity                                          | 0.02537498         |
| GO:0008745 | N-acetylmuramoyl-L-alanine amidase activity                    | 0.02537498         |
| GO:0009252 | peptidoglycan biosynthetic process                             | 0.00984618         |
| GO:0009597 | detection of virus                                             | 0.004014615        |
| GO:0009615 | response to virus                                              | 0.004014615        |
| GO:0010033 | response to organic substance                                  | 0.0375981          |
| GO:0010466 | negative regulation of peptidase activity                      | 0.02537498         |
| GO:0010876 | lipid localization                                             | 0.000857191        |
| GO:0010951 | negative regulation of endopeptidase activity                  | 0.02537498         |
| GO:0014070 | response to organic cyclic compound                            | 0.03125707         |
| GO:0015267 | channel activity                                               | 0.001730817        |
| GO:0015288 | porin activity                                                 | 0.000186527        |
| GO:0015688 | Siderophore-dependent iron import into cell                    | 0.01416171         |
| GO:0015711 | organic anion transport                                        | 0.000601766        |
| GO:0015748 | organophosphate ester transport                                | 0.03125707         |
| GO:0015807 | L-amino acid transport                                         | 0.0027648          |
| GO:0015891 | siderophore transport                                          | 0.01416171         |
| GO:0015914 | phospholipid transport                                         | 0.03125707         |
| GO:0015920 | lipopolysaccharide transport                                   | 0.00051735         |
| GO:0016021 | integral component of membrane                                 | 0.03699752         |
| GO:0019058 | viral life cycle                                               | 0.02001884         |
| GO:0022803 | passive transmembrane transporter activity                     | 0.001730817        |
| GO:0022829 | wide pore channel activity                                     | 0.000186527        |
| GO:0030260 | entry into host                                                | 0.00051735         |
| GO:0030312 | external encapsulating structure                               | 0.000661262        |
| GO:0030414 | peptidase inhibitor activity                                   | 0.02537498         |
| GO:0031224 | intrinsic component of membrane                                | 0.006235302        |
| GO:0031230 | intrinsic component of cell outer membrane                     | 0.007176907        |
| GO:0031241 | periplasmic side of cell outer membrane                        | 6.47E-05           |
| GO:0031246 | intrinsic component of periplasmic side of cell outer membrane | 0.001576114        |
| GO:0032978 | protein insertion into membrane from inner side                | 0.02537498         |
| GO:0034220 | ion transmembrane transport                                    | 0.03775271         |
| GO:0034613 | cellular protein localization                                  | 0.02996041         |
| GO:0042277 | peptide binding                                                | 0.01483782         |
| GO:0042930 | enterobactin transport                                         | 0.01416171         |
| GO:0042938 | dipeptide transport                                            | 0.004014615        |
| GO:0043163 | cell envelope organization                                     | 2.26E-09           |
| GO:0043165 | Gram-negative-bacterium-type cell outer membrane assembly      | 2.26E-09           |
| GO:0044038 | cell wall macromolecule biosynthetic process                   | 0.00984618         |
| GO:0044091 | membrane biogenesis                                            | 2.26E-09           |
| GO:0044409 | entry into host                                                | 0.00051735         |
| GO:0045229 | external encapsulating structure organization                  | 1.36E-08           |
| GO:0045861 | negative regulation of proteolysis                             | 0.02537498         |

| GO Term    | Description                                                 | P-value (Serratia) |
|------------|-------------------------------------------------------------|--------------------|
| GO:0046718 | viral entry into host cell                                  | 0.00051735         |
| GO:0046930 | pore complex                                                | 0.00051735         |
| GO:0051181 | cofactor transport                                          | 0.03125707         |
| GO:0051205 | protein insertion into membrane                             | 0.0027648          |
| GO:0051701 | interaction with host                                       | 0.02001884         |
| GO:0051806 | entry into host                                             | 0.00051735         |
| GO:0051828 | entry into other organism involved in symbiotic interaction | 0.00051735         |
| GO:0052547 | regulation of peptidase activity                            | 0.02537498         |
| GO:0052548 | regulation of endopeptidase activity                        | 0.02537498         |
| GO:0061024 | membrane organization                                       | 3.56E-10           |
| GO:0061134 | peptidase regulator activity                                | 0.02537498         |
| GO:0061135 | endopeptidase regulator activity                            | 0.02537498         |
| GO:0061783 | peptidoglycan muralytic activity                            | 0.00051735         |
| GO:0070589 | cellular component macromolecule biosynthetic process       | 0.00984618         |
| GO:0070727 | cellular macromolecule localization                         | 0.02996041         |
| GO:0071709 | membrane assembly                                           | 2.26E-09           |
| GO:0072657 | protein localization to membrane                            | 0.003660424        |
| GO:0090150 | establishment of protein localization to membrane           | 0.007259702        |
| GO:0098552 | side of membrane                                            | 0.001099312        |
| GO:0098656 | anion transmembrane transport                               | 0.04108586         |
| GO:0120009 | intermembrane lipid transfer                                | 0.03125707         |
| GO:0120010 | intermembrane phospholipid transfer                         | 0.03125707         |
| GO:1901264 | carbohydrate derivative transport                           | 0.000443946        |
| GO:1901678 | iron coordination entity transport                          | 0.01416171         |
| GO:1990063 | Bam protein complex                                         | 0.0027648          |



**Table S8.** GO terms of proteins underexpressed both in Ra4 (*Rahnella aquatilis*) and in Sp2 (*Serratia plymuthica*) treated with 0.4% NaCl vs Control.

| GO Term    | Description                                       | P-value (Rahnella) | P-value (Serratia) |
|------------|---------------------------------------------------|--------------------|--------------------|
| GO:0000217 | DNA secondary structure binding                   | 0.01305778         | 0.004660561        |
| GO:0000400 | four-way junction DNA binding                     | 0.01305778         | 0.004660561        |
| GO:0004743 | pyruvate kinase activity                          | 0.01238103         | 0.04065939         |
| GO:0004807 | triose-phosphate isomerase activity               | 0.03622317         | 0.004660561        |
| GO:0006066 | alcohol metabolic process                         | 0.002867256        | 0.003154162        |
| GO:0006071 | glycerol metabolic process                        | 0.01238103         | 0.04065939         |
| GO:0006115 | ethanol biosynthetic process                      | 0.03622317         | 0.004660561        |
| GO:0008774 | acetaldehyde dehydrogenase (acetylating) activity | 0.03622317         | 0.004660561        |
| GO:0019400 | alditol metabolic process                         | 0.01238103         | 0.04065939         |
| GO:0019405 | alditol catabolic process                         | 0.01238103         | 0.02552491         |
| GO:0019563 | glycerol catabolic process                        | 0.01238103         | 0.02552491         |
| GO:0034309 | primary alcohol biosynthetic process              | 0.03622317         | 0.004660561        |
| GO:0040011 | locomotion                                        | 0.02008507         | 0.000294434        |
| GO:0046165 | alcohol biosynthetic process                      | 0.03622317         | 0.004660561        |
| GO:0046166 | glyceraldehyde-3-phosphate biosynthetic process   | 0.03622317         | 0.004660561        |
| GO:0046184 | aldehyde biosynthetic process                     | 0.01238103         | 0.02552491         |
| GO:1901615 | organic hydroxy compound metabolic process        | 0.002781958        | 0.01572703         |
| GO:1901617 | organic hydroxy compound biosynthetic process     | 0.01238103         | 0.04065939         |

**Table S9.** GO terms of proteins underexpressed only in Ra4 (*Rahnella aquatilis*) treated with 0.4% NaCl vs Control.

| GO Term    | Description                                          | P-value (Rahnella) |
|------------|------------------------------------------------------|--------------------|
| GO:0000096 | sulfur amino acid metabolic process                  | 0.004778599        |
| GO:0000097 | sulfur amino acid biosynthetic process               | 0.002867256        |
| GO:0000966 | RNA 5'-end processing                                | 0.03622317         |
| GO:0000967 | rRNA 5'-end processing                               | 0.03622317         |
| GO:0003824 | catalytic activity                                   | 0.004035336        |
| GO:0004073 | aspartate-semialdehyde dehydrogenase activity        | 0.01305778         |
| GO:0004124 | cysteine synthase activity                           | 0.03622317         |
| GO:0004356 | glutamate-ammonia ligase activity                    | 0.03622317         |
| GO:0004375 | glycine dehydrogenase (decarboxylating) activity     | 0.001475094        |
| GO:0004470 | malic enzyme activity                                | 0.03622317         |
| GO:0004816 | asparagine-tRNA ligase activity                      | 0.01305778         |
| GO:0005622 | intracellular                                        | 0.002424878        |
| GO:0005737 | cytoplasm                                            | 0.00930345         |
| GO:0005829 | cytosol                                              | 0.008273604        |
| GO:0005975 | carbohydrate metabolic process                       | 0.01402159         |
| GO:0006082 | organic acid metabolic process                       | 0.003733665        |
| GO:0006090 | pyruvate metabolic process                           | 0.01341953         |
| GO:0006096 | glycolytic process                                   | 0.002644354        |
| GO:0006108 | malate metabolic process                             | 0.03622317         |
| GO:0006116 | NADH oxidation                                       | 0.01305778         |
| GO:0006163 | purine nucleotide metabolic process                  | 0.000936824        |
| GO:0006164 | purine nucleotide biosynthetic process               | 0.00040464         |
| GO:0006165 | nucleoside diphosphate phosphorylation               | 0.003468464        |
| GO:0006421 | asparaginyl-tRNA aminoacylation                      | 0.01305778         |
| GO:0006520 | cellular amino acid metabolic process                | 0.00991025         |
| GO:0006535 | cysteine biosynthetic process from serine            | 0.03622317         |
| GO:0006541 | glutamine metabolic process                          | 0.004380063        |
| GO:0006542 | glutamine biosynthetic process                       | 0.03622317         |
| GO:0006563 | L-serine metabolic process                           | 0.002867256        |
| GO:0006725 | cellular aromatic compound metabolic process         | 0.02721901         |
| GO:0006732 | coenzyme metabolic process                           | 0.02120952         |
| GO:0006733 | oxidoreduction coenzyme metabolic process            | 0.01902246         |
| GO:0006734 | NADH metabolic process                               | 0.01305778         |
| GO:0006753 | nucleoside phosphate metabolic process               | 0.01519071         |
| GO:0006754 | ATP biosynthetic process                             | 0.000339656        |
| GO:0006757 | ATP generation from ADP                              | 0.002644354        |
| GO:0006793 | phosphorus metabolic process                         | 0.008471227        |
| GO:0006796 | phosphate-containing compound metabolic process      | 0.01151261         |
| GO:0006935 | chemotaxis                                           | 0.007988557        |
| GO:0008152 | metabolic process                                    | 0.03327529         |
| GO:0008198 | ferrous iron binding                                 | 0.01305778         |
| GO:0008652 | cellular amino acid biosynthetic process             | 0.006700054        |
| GO:0009058 | biosynthetic process                                 | 0.002741617        |
| GO:0009069 | serine family amino acid metabolic process           | 0.008564943        |
| GO:0009070 | serine family amino acid biosynthetic process        | 0.000644798        |
| GO:0009086 | methionine biosynthetic process                      | 0.03644501         |
| GO:0009088 | threonine biosynthetic process                       | 0.01305778         |
| GO:0009089 | lysine biosynthetic process via diaminopimelate      | 0.03644501         |
| GO:0009090 | homoserine biosynthetic process                      | 0.03622317         |
| GO:0009092 | homoserine metabolic process                         | 0.03622317         |
| GO:0009108 | coenzyme biosynthetic process                        | 0.004646654        |
| GO:0009117 | nucleotide metabolic process                         | 0.01519071         |
| GO:0009123 | nucleoside monophosphate metabolic process           | 0.00040464         |
| GO:0009124 | nucleoside monophosphate biosynthetic process        | 0.000133828        |
| GO:0009126 | purine nucleoside monophosphate metabolic process    | 0.00036557         |
| GO:0009127 | purine nucleoside monophosphate biosynthetic process | 0.000241849        |
| GO:0009132 | nucleoside diphosphate metabolic process             | 0.001934503        |
| GO:0009135 | purine nucleoside diphosphate metabolic process      | 0.001471131        |
| GO:0009141 | nucleoside triphosphate metabolic process            | 0.004646654        |
| GO:0009142 | nucleoside triphosphate biosynthetic process         | 0.001010332        |

| GO Term    | Description                                                                                     | P-value (Rahnella) |
|------------|-------------------------------------------------------------------------------------------------|--------------------|
| GO:0009144 | purine nucleoside triphosphate metabolic process                                                | 0.00254214         |
| GO:0009145 | purine nucleoside triphosphate biosynthetic process                                             | 0.000599766        |
| GO:0009150 | purine ribonucleotide metabolic process                                                         | 0.001920768        |
| GO:0009152 | purine ribonucleotide biosynthetic process                                                      | 0.001082809        |
| GO:0009156 | ribonucleoside monophosphate biosynthetic process                                               | 7.67E-05           |
| GO:0009161 | ribonucleoside monophosphate metabolic process                                                  | 0.000124709        |
| GO:0009165 | nucleotide biosynthetic process                                                                 | 0.001818302        |
| GO:0009166 | nucleotide catabolic process                                                                    | 0.011015           |
| GO:0009167 | purine ribonucleoside monophosphate metabolic process                                           | 0.00036557         |
| GO:0009168 | purine ribonucleoside monophosphate biosynthetic process                                        | 0.000241849        |
| GO:0009179 | purine ribonucleoside diphosphate metabolic process                                             | 0.001471131        |
| GO:0009185 | ribonucleoside diphosphate metabolic process                                                    | 0.001471131        |
| GO:0009199 | ribonucleoside triphosphate metabolic process                                                   | 0.003829339        |
| GO:0009201 | ribonucleoside triphosphate biosynthetic process                                                | 0.001010332        |
| GO:0009205 | purine ribonucleoside triphosphate metabolic process                                            | 0.00254214         |
| GO:0009206 | purine ribonucleoside triphosphate biosynthetic process                                         | 0.000599766        |
| GO:0009259 | ribonucleotide metabolic process                                                                | 0.002599612        |
| GO:0009260 | ribonucleotide biosynthetic process                                                             | 0.001610841        |
| GO:0009333 | cysteine synthase complex                                                                       | 0.03622317         |
| GO:0009593 | detection of chemical stimulus                                                                  | 0.03622317         |
| GO:0009730 | detection of carbohydrate stimulus                                                              | 0.03622317         |
| GO:0009743 | response to carbohydrate                                                                        | 0.03622317         |
| GO:0015766 | disaccharide transport                                                                          | 0.03622317         |
| GO:0015768 | maltose transport                                                                               | 0.03622317         |
| GO:0015772 | oligosaccharide transport                                                                       | 0.03622317         |
| GO:0015774 | polysaccharide transport                                                                        | 0.03622317         |
| GO:0015821 | methionine transport                                                                            | 0.01305778         |
| GO:0016052 | carbohydrate catabolic process                                                                  | 0.001157467        |
| GO:0016053 | organic acid biosynthetic process                                                               | 0.001213802        |
| GO:0016211 | ammonia ligase activity                                                                         | 0.03622317         |
| GO:0016310 | phosphorylation                                                                                 | 0.003257328        |
| GO:0016477 | cell migration                                                                                  | 0.03622317         |
| GO:0016491 | oxidoreductase activity                                                                         | 0.02075898         |
| GO:0016614 | oxidoreductase activity, acting on CH-OH group of donors                                        | 0.01428636         |
| GO:0016615 | malate dehydrogenase activity                                                                   | 0.03622317         |
| GO:0016620 | oxidoreductase activity, acting on the aldehyde or oxo group of donors, NAD or NADP as acceptor | 0.007988557        |
| GO:0016638 | oxidoreductase activity, acting on the CH-NH2 group of donors                                   | 0.001475094        |
| GO:0016642 | oxidoreductase activity, acting on the CH-NH2 group of donors, disulfide as acceptor            | 0.001475094        |
| GO:0016740 | transferase activity                                                                            | 0.02307052         |
| GO:0016765 | transferase activity, transferring alkyl or aryl (other than methyl) groups                     | 0.004778599        |
| GO:0016879 | ligase activity, forming carbon-nitrogen bonds                                                  | 0.03308006         |
| GO:0016880 | acid-ammonia (or amide) ligase activity                                                         | 0.03622317         |
| GO:0016903 | oxidoreductase activity, acting on the aldehyde or oxo group of donors                          | 0.0392069          |
| GO:0017144 | drug metabolic process                                                                          | 0.003784371        |
| GO:0018130 | heterocycle biosynthetic process                                                                | 0.005195686        |
| GO:0019344 | cysteine biosynthetic process                                                                   | 0.03622317         |
| GO:0019359 | nicotinamide nucleotide biosynthetic process                                                    | 0.002644354        |
| GO:0019362 | pyridine nucleotide metabolic process                                                           | 0.01359257         |
| GO:0019363 | pyridine nucleotide biosynthetic process                                                        | 0.002644354        |
| GO:0019438 | aromatic compound biosynthetic process                                                          | 0.007948905        |
| GO:0019439 | aromatic compound catabolic process                                                             | 0.04476282         |
| GO:0019637 | organophosphate metabolic process                                                               | 0.01501704         |
| GO:0019674 | NAD metabolic process                                                                           | 0.01305778         |
| GO:0019676 | ammonia assimilation cycle                                                                      | 0.03622317         |
| GO:0019693 | ribose phosphate metabolic process                                                              | 0.003845109        |
| GO:0019740 | nitrogen utilization                                                                            | 0.03622317         |
| GO:0019751 | polyol metabolic process                                                                        | 0.02270289         |
| GO:0019752 | carboxylic acid metabolic process                                                               | 0.003733665        |
| GO:0019898 | extrinsic component of membrane                                                                 | 0.002059172        |
| GO:0030170 | pyridoxal phosphate binding                                                                     | 0.03631771         |

| GO Term    | Description                                                                          | P-value (Rahnella) |
|------------|--------------------------------------------------------------------------------------|--------------------|
| GO:0031234 | extrinsic component of cytoplasmic side of plasma membrane                           | 0.01305778         |
| GO:0033037 | polysaccharide localization                                                          | 0.03622317         |
| GO:0033178 | proton-transporting two-sector ATPase complex, catalytic domain                      | 0.03644501         |
| GO:0034022 | 3-(hydroxyamino)phenol mutase activity                                               | 0.03622317         |
| GO:0034285 | response to disaccharide                                                             | 0.03622317         |
| GO:0034286 | response to maltose                                                                  | 0.03622317         |
| GO:0034288 | detection of disaccharide stimulus                                                   | 0.03622317         |
| GO:0034289 | detection of maltose stimulus                                                        | 0.03622317         |
| GO:0034404 | nucleobase-containing small molecule biosynthetic process                            | 0.01338439         |
| GO:0034471 | ncRNA 5'-end processing                                                              | 0.03622317         |
| GO:0034654 | nucleobase-containing compound biosynthetic process                                  | 0.009931168        |
| GO:0034655 | nucleobase-containing compound catabolic process                                     | 0.04476282         |
| GO:0042330 | taxis                                                                                | 0.007988557        |
| GO:0042537 | benzene-containing compound metabolic process                                        | 0.03622317         |
| GO:0042866 | pyruvate biosynthetic process                                                        | 0.002644354        |
| GO:0042940 | D-amino acid transport                                                               | 0.01305778         |
| GO:0042956 | maltodextrin transport                                                               | 0.03622317         |
| GO:0043190 | ATP-binding cassette (ABC) transporter complex                                       | 0.004380063        |
| GO:0043436 | oxoacid metabolic process                                                            | 0.003733665        |
| GO:0043648 | dicarboxylic acid metabolic process                                                  | 0.001983787        |
| GO:0044249 | cellular biosynthetic process                                                        | 0.004313104        |
| GO:0044270 | cellular nitrogen compound catabolic process                                         | 0.04476282         |
| GO:0044272 | sulfur compound biosynthetic process                                                 | 0.04754571         |
| GO:0044281 | small molecule metabolic process                                                     | 2.23E-05           |
| GO:0044283 | small molecule biosynthetic process                                                  | 0.000119999        |
| GO:0044424 | obsolete intracellular part                                                          | 0.002424878        |
| GO:0044444 | obsolete cytoplasmic part                                                            | 0.01184802         |
| GO:0045260 | plasma membrane proton-transporting ATP synthase complex                             | 0.03644501         |
| GO:0045261 | proton-transporting ATP synthase complex, catalytic core F(1)                        | 0.03644501         |
| GO:0045262 | plasma membrane proton-transporting ATP synthase complex, catalytic core F(1)        | 0.03644501         |
| GO:0045281 | succinate dehydrogenase complex                                                      | 0.03622317         |
| GO:0045282 | plasma membrane succinate dehydrogenase complex                                      | 0.03622317         |
| GO:0045912 | negative regulation of carbohydrate metabolic process                                | 0.01305778         |
| GO:0046031 | ADP metabolic process                                                                | 0.004482494        |
| GO:0046034 | ATP metabolic process                                                                | 0.001632573        |
| GO:0046164 | alcohol catabolic process                                                            | 0.02270289         |
| GO:0046174 | polyol catabolic process                                                             | 0.02270289         |
| GO:0046390 | ribose phosphate biosynthetic process                                                | 0.001610841        |
| GO:0046394 | carboxylic acid biosynthetic process                                                 | 0.001213802        |
| GO:0046434 | organophosphate catabolic process                                                    | 0.01341953         |
| GO:0046483 | heterocycle metabolic process                                                        | 0.04421            |
| GO:0046496 | nicotinamide nucleotide metabolic process                                            | 0.01359257         |
| GO:0046658 | anchored component of plasma membrane                                                | 0.01305778         |
| GO:0046939 | nucleotide phosphorylation                                                           | 0.005714416        |
| GO:0048030 | disaccharide binding                                                                 | 0.03622317         |
| GO:0048473 | D-methionine transport                                                               | 0.01305778         |
| GO:0050486 | intramolecular transferase activity, transferring hydroxy groups                     | 0.03622317         |
| GO:0051188 | cofactor biosynthetic process                                                        | 0.01106151         |
| GO:0051606 | detection of stimulus                                                                | 0.03622317         |
| GO:0055052 | ATP-binding cassette (ABC) transporter complex, substrate-binding subunit-containing | 0.000753188        |
| GO:0055086 | nucleobase-containing small molecule metabolic process                               | 0.01359174         |
| GO:0055114 | oxidation-reduction process                                                          | 0.04831034         |
| GO:0060326 | cell chemotaxis                                                                      | 0.03622317         |
| GO:0070279 | vitamin B6 binding                                                                   | 0.03631771         |
| GO:0070403 | NAD+ binding                                                                         | 0.01305778         |
| GO:0070492 | oligosaccharide binding                                                              | 0.03622317         |
| GO:0072330 | monocarboxylic acid biosynthetic process                                             | 0.03762314         |
| GO:0072521 | purine-containing compound metabolic process                                         | 0.002216701        |
| GO:0072522 | purine-containing compound biosynthetic process                                      | 0.000501629        |
| GO:0072524 | pyridine-containing compound metabolic process                                       | 0.006617782        |
| GO:0072525 | pyridine-containing compound biosynthetic process                                    | 0.001102393        |

| GO Term    | Description                                      | P-value (Rahnella) |
|------------|--------------------------------------------------|--------------------|
| GO:0080146 | L-cysteine desulfhydrase activity                | 0.03622317         |
| GO:0090407 | organophosphate biosynthetic process             | 0.002707148        |
| GO:0098533 | ATPase dependent transmembrane transport complex | 0.004380063        |
| GO:0098797 | plasma membrane protein complex                  | 0.002644354        |
| GO:1901135 | carbohydrate derivative metabolic process        | 0.04819767         |
| GO:1901137 | carbohydrate derivative biosynthetic process     | 0.004888293        |
| GO:1901292 | nucleoside phosphate catabolic process           | 0.011015           |
| GO:1901293 | nucleoside phosphate biosynthetic process        | 0.001818302        |
| GO:1901360 | organic cyclic compound metabolic process        | 0.01621869         |
| GO:1901362 | organic cyclic compound biosynthetic process     | 0.003742089        |
| GO:1901566 | organonitrogen compound biosynthetic process     | 0.000889639        |
| GO:1901576 | organic substance biosynthetic process           | 0.00254786         |
| GO:1901605 | alpha-amino acid metabolic process               | 0.008698654        |
| GO:1901607 | alpha-amino acid biosynthetic process            | 0.007976329        |
| GO:1901616 | organic hydroxy compound catabolic process       | 0.02270289         |
| GO:1901982 | maltose binding                                  | 0.03622317         |
| GO:1902495 | transmembrane transporter complex                | 0.0392069          |
| GO:1904949 | ATPase complex                                   | 0.02862085         |
| GO:1990351 | transporter complex                              | 0.0392069          |



**Table S10.** GO terms of proteins underexpressed only in Sp2 (*Serratia plymuthica*) treated with 0.4% NaCl vs Control.

| GO Term    | Description                                               | P-value (Serratia) |
|------------|-----------------------------------------------------------|--------------------|
| GO:0000027 | ribosomal large subunit assembly                          | 0.01413104         |
| GO:0000028 | ribosomal small subunit assembly                          | 0.000351472        |
| GO:0001539 | cilium or flagellum-dependent cell motility               | 0.009156847        |
| GO:0003676 | nucleic acid binding                                      | 0.007824212        |
| GO:0003723 | RNA binding                                               | 0.04663955         |
| GO:0003735 | structural constituent of ribosome                        | 0.009758061        |
| GO:0004022 | alcohol dehydrogenase (NAD+) activity                     | 0.000312574        |
| GO:0004520 | endodeoxyribonuclease activity                            | 0.04065939         |
| GO:0005198 | structural molecule activity                              | 0.009758061        |
| GO:0005576 | extracellular region                                      | 0.001255743        |
| GO:0005840 | ribosome                                                  | 0.01065786         |
| GO:0006067 | ethanol metabolic process                                 | 0.01335653         |
| GO:0006310 | DNA recombination                                         | 0.04065939         |
| GO:0006417 | regulation of translation                                 | 0.03205971         |
| GO:0006566 | threonine metabolic process                               | 0.001996164        |
| GO:0006567 | threonine catabolic process                               | 0.000617077        |
| GO:0006928 | movement of cell or subcellular component                 | 0.000585109        |
| GO:0006996 | organelle organization                                    | 0.000868432        |
| GO:0007154 | cell communication                                        | 0.02406593         |
| GO:0008861 | formate C-acetyltransferase activity                      | 9.81E-05           |
| GO:0009063 | cellular amino acid catabolic process                     | 0.03619223         |
| GO:0009066 | aspartate family amino acid metabolic process             | 0.01596951         |
| GO:0009068 | aspartate family amino acid catabolic process             | 0.001169839        |
| GO:0009288 | bacterial-type flagellum                                  | 3.00E-09           |
| GO:0009314 | response to radiation                                     | 0.0433478          |
| GO:0009409 | response to cold                                          | 0.03010927         |
| GO:0009424 | bacterial-type flagellum hook                             | 0.001188158        |
| GO:0009425 | bacterial-type flagellum basal body                       | 0.01335653         |
| GO:0009432 | SOS response                                              | 0.02552491         |
| GO:0009893 | positive regulation of metabolic process                  | 0.0215086          |
| GO:0010212 | response to ionizing radiation                            | 0.03444911         |
| GO:0010604 | positive regulation of macromolecule metabolic process    | 0.0215086          |
| GO:0010608 | posttranscriptional regulation of gene expression         | 0.04554022         |
| GO:0010628 | positive regulation of gene expression                    | 0.04929504         |
| GO:0015935 | small ribosomal subunit                                   | 0.003133877        |
| GO:0016043 | cellular component organization                           | 0.01725526         |
| GO:0016407 | acetyltransferase activity                                | 0.00668461         |
| GO:0016408 | C-acyltransferase activity                                | 0.001996164        |
| GO:0016453 | C-acetyltransferase activity                              | 0.000617077        |
| GO:0017148 | negative regulation of translation                        | 0.02822709         |
| GO:0019843 | rRNA binding                                              | 0.002618538        |
| GO:0022607 | cellular component assembly                               | 0.00978186         |
| GO:0022613 | ribonucleoprotein complex biogenesis                      | 0.000930684        |
| GO:0022618 | ribonucleoprotein complex assembly                        | 0.000229534        |
| GO:0022626 | cytosolic ribosome                                        | 0.01065786         |
| GO:0022627 | cytosolic small ribosomal subunit                         | 0.003133877        |
| GO:0031323 | regulation of cellular metabolic process                  | 0.04814551         |
| GO:0031325 | positive regulation of cellular metabolic process         | 0.01596951         |
| GO:0032268 | regulation of cellular protein metabolic process          | 0.006029083        |
| GO:0032269 | negative regulation of cellular protein metabolic process | 0.0433478          |
| GO:0032270 | positive regulation of cellular protein metabolic process | 0.009156847        |
| GO:0034248 | regulation of cellular amide metabolic process            | 0.04554022         |
| GO:0034249 | negative regulation of cellular amide metabolic process   | 0.02822709         |
| GO:0034308 | primary alcohol metabolic process                         | 0.02552491         |
| GO:0034622 | cellular protein-containing complex assembly              | 0.000359931        |
| GO:0042254 | ribosome biogenesis                                       | 0.000718876        |
| GO:0042255 | ribosome assembly                                         | 0.000167364        |

| GO Term    | Description                                                  | P-value (Serratia) |
|------------|--------------------------------------------------------------|--------------------|
| GO:0042273 | ribosomal large subunit biogenesis                           | 0.01413104         |
| GO:0042274 | ribosomal small subunit biogenesis                           | 0.000752232        |
| GO:0042995 | cell projection                                              | 3.00E-09           |
| GO:0043226 | organelle                                                    | 8.01E-06           |
| GO:0043228 | non-membrane-bounded organelle                               | 9.70E-06           |
| GO:0043229 | intracellular organelle                                      | 0.02928948         |
| GO:0043232 | intracellular non-membrane-bounded organelle                 | 0.02367969         |
| GO:0043933 | protein-containing complex subunit organization              | 0.003362565        |
| GO:0044085 | cellular component biogenesis                                | 0.0389506          |
| GO:0044391 | ribosomal subunit                                            | 0.01065786         |
| GO:0044422 | obsolete organelle part                                      | 0.000452334        |
| GO:0044445 | obsolete cytosolic part                                      | 0.02481009         |
| GO:0044446 | obsolete intracellular organelle part                        | 0.01375375         |
| GO:0044461 | obsolete bacterial-type flagellum part                       | 9.81E-05           |
| GO:0044463 | obsolete cell projection part                                | 9.81E-05           |
| GO:0048518 | positive regulation of biological process                    | 0.01226333         |
| GO:0048522 | positive regulation of cellular process                      | 0.006543907        |
| GO:0048870 | cell motility                                                | 0.000585109        |
| GO:0051173 | positive regulation of nitrogen compound metabolic process   | 0.01150958         |
| GO:0051246 | regulation of protein metabolic process                      | 0.006029083        |
| GO:0051247 | positive regulation of protein metabolic process             | 0.009156847        |
| GO:0051248 | negative regulation of protein metabolic process             | 0.0433478          |
| GO:0051674 | localization of cell                                         | 0.000585109        |
| GO:0065003 | protein-containing complex assembly                          | 0.002788147        |
| GO:0070925 | organelle assembly                                           | 0.000149083        |
| GO:0071826 | ribonucleoprotein complex subunit organization               | 0.000229534        |
| GO:0071973 | bacterial-type flagellum-dependent cell motility             | 0.009156847        |
| GO:0071978 | bacterial-type flagellum-dependent swarming motility         | 0.000279027        |
| GO:0097588 | archaeal or bacterial-type flagellum-dependent cell motility | 0.009156847        |
| GO:1901606 | alpha-amino acid catabolic process                           | 0.03010927         |
| GO:1990904 | ribonucleoprotein complex                                    | 0.01492792         |
